# Supplementary material for: Understanding the design of warning signals: a predator’s view
Source: Research Square preprint supplement (doi:10.21203/rs.3.rs-777244/v1), 2021-08-13
Supplement: Supplementary file 1 [file 2890a44cc65d8066d0c83dd5.xlsx]

## Sheet: Sheet1
Species number	Species	Family	Aposematic/non-aposematic	Evidence of palatability, representative paper
1	Abraxas fulvobasalis	Geometridae	Aposematic	Nishida, R. (1994). Chemoecology, 5(3-4), 127-138.
2	Abraxas grossulariata	Geometridae	Aposematic	Nishida, R. (1994). Chemoecology, 5(3-4), 127-138.
3	Abraxas latifasciata	Geometridae	Aposematic	Nishida, R. (1994). Chemoecology, 5(3-4), 127-138.
4	Abraxas miranda	Geometridae	Aposematic	Nishida, R. (1994). Chemoecology, 5(3-4), 127-138.
5	Abraxas niphonibia	Geometridae	Aposematic	Nishida, R. (1994). Chemoecology, 5(3-4), 127-138.
6	Actinote anteas	Nymphalidae	Aposematic	Trigo, J. R. (2000). Journal of the Brazilian Chemical Society, 11(6), 551-561.
7	Adelpha bredowii	Nymphalidae	Aposematic	Prudic, K. L. et al. (2002). Ecological Entomology, 27(1), 68-75.
8	Aeria olena	Nymphalidae	Aposematic	Trigo, J. R. & Brown, K. S. Jr. (1990). Chemoecology, 1, 22-29
9	Aglais urticae	Nymphalidae	Aposematic	Hagen, S. B. et al. (2003). Ecological Entomology, 28(4), 503-509.
10	Agraulis vanillae	Nymphalidae	Aposematic	Ross, G. N. et al. (2001). Journal of Chemical Ecology, 27(6), 1219-1228. Brower et al 1963.
11	Amauris echeria	Nymphalidae	Aposematic	Rowe, C., & Halpin, C. (2013). Behavioral Ecology and Sociobiology, 67(9), 1425-1439.
12	Amauris niavius	Nymphalidae	Aposematic	Vane-Wright, R. I., & Boppre, M. (1993). Philosophical Transactions: Biological Sciences, 197-205.
13	Arctia caja	Erebidae	Aposematic	Rowe, C., & Halpin, C. (2013). Behavioral Ecology and Sociobiology, 67(9), 1425-1439.
14	Arctia villica	Erebidae	Aposematic	Rowe, C., & Halpin, C. (2013). Behavioral Ecology and Sociobiology, 67(9), 1425-1439.
15	Argina astrea	Erebidae	Aposematic	Opitz, S. E., & Müller, C. (2009). Chemoecology, 19(3), 117-154.
16	Arichanna gaschkevitchii	Geometridae	Aposematic	Nishida, R. (1994). Chemoecology, 5(3-4), 127-138.
17	Arichanna melanaria	Geometridae	Aposematic	Nishida, R. (1994). Chemoecology, 5(3-4), 127-138.
18	Astraptes creteus	Hesperiidae	Aposematic	Trigo, J. R. (2000). Journal of the Brazilian Chemical Society, 11(6), 551-561.
19	Battus archidamus	Papilionidae	Aposematic	Harborne, J. B. (2001). Natural Product Reports, 18(4), 361-379.
20	Battus belus	Papilionidae	Aposematic	Klitzke, C. F., & Brown Jr, K. S. (2000). Chemoecology, 10(2), 99-102.
21	Battus crassus	Papilionidae	Aposematic	Klitzke, C. F., & Brown Jr, K. S. (2000). Chemoecology, 10(2), 99-102.
22	Battus philenor	Papilionidae	Aposematic	Rutowski, R. L. et al. (2010). Functional Ecology,24(4), 767-775.
23	Battus polydamas	Papilionidae	Aposematic	Klitzke, C. F., & Brown Jr, K. S. (2000). Chemoecology, 10(2), 99-102.
24	Biblis hyperia	Nymphalidae	Aposematic	Pinheiro, C. E. (1996). Biological Journal of the Linnean Society, 59(4), 351-365.
25	Caligo beltrao	Nymphalidae	Aposematic	Trigo, J. R. (2000). Journal of the Brazilian Chemical Society, 11(6), 551-561.
26	Callicore astarte	Nymphalidae	Aposematic	Pinheiro, C. E. (1996). Biological Journal of the Linnean Society, 59(4), 351-365.
27	Colias eurytheme	Pieridae	Aposematic	Srygley, R. B., & Kingsolver, J. G. (1998). Biological Journal of the Linnean Society, 64(1), 41-55.
28	Composia fidelissima	Erebidae	Aposematic	Rowe, C., & Halpin, C. (2013). Behavioral Ecology and Sociobiology, 67(9), 1425-1439.
29	Cosmosoma myrodora	Erebidae	Aposematic	Conner, W.E. et al. (2000). Proceedings of the National Academy of Sciences, 97(26), 14406-14411.
30	Cycnia inopinatus	Erebidae	Aposematic	Opitz, S. E., & Müller, C. (2009). Chemoecology, 19(3), 117-154.
31	Cycnia tenera	Erebidae	Aposematic	Opitz, S. E., & Müller, C. (2009). Chemoecology, 19(3), 117-154.
32	Danaus chrysippus	Nymphalidae	Aposematic	Larsen, T. B. (1992). Tropical Lepidoptera, 3, 101-104.
33	Danaus eresimus	Nymphalidae	Aposematic	Pinheiro, C. E. (1996). Biological Journal of the Linnean Society, 59(4), 351-365.
34	Danaus plexippus	Nymphalidae	Aposematic	Pinheiro, C. E. (1996). Biological Journal of the Linnean Society, 59(4), 351-365.
35	Diaethria clymena	Nymphalidae	Aposematic	Pinheiro, C. E. (1996). Biological Journal of the Linnean Society, 59(4), 351-365.
36	Dione juno	Nymphalidae	Aposematic	Pinheiro, C. E. (1996). Biological Journal of the Linnean Society, 59(4), 351-365.
37	Dismorphia amphione	Pieridae	Aposematic	Beccaloni, G. (1997). Tropical Lepidoptera, 8, 103-124.
38	Eueides aliphera	Nymphalidae	Aposematic	Pinheiro, C. E. (1996). Biological Journal of the Linnean Society, 59(4), 351-365.
39	Eueides isabella	Nymphalidae	Aposematic	Pinheiro, C. E. (1996). Biological Journal of the Linnean Society, 59(4), 351-365.
40	Eueides tales	Nymphalidae	Aposematic	Pinheiro, C. E. (1996). Biological Journal of the Linnean Society, 59(4), 351-365.
41	Euphydryas anicia	Nymphalidae	Aposematic	Bowers, M. D., & Farley, S. (1990). Animal Behaviour, 39(4), 699-705.
42	Euphydryas cynthia	Nymphalidae	Aposematic	Opitz, S. E., & Müller, C. (2009). Chemoecology, 19(3), 117-154.
43	Euphydryas gillettii	Nymphalidae	Aposematic	Bowers, M. D., & Farley, S. (1990). Animal Behaviour, 39(4), 699-705.
44	Euphydryas phaeton	Nymphalidae	Aposematic	Bowers, M. D., & Farley, S. (1990). Animal Behaviour, 39(4), 699-705.
45	Heliconius burneyi	Nymphalidae	Aposematic	Orellana, A. M. (2006). Revista Peruana de Entomologia, 45, 71-74.
46	Heliconius charithonia	Nymphalidae	Aposematic	Cardoso, M. Z., & Gilbert, L. E. (2013). Journal of Evolutionary Biology, 26(6), 1254-1260.
47	Heliconius cydno	Nymphalidae	Aposematic	Kapan, D. D. (2001). Nature, 409, 338-340.
48	Heliconius eleuchia	Nymphalidae	Aposematic	Kapan, D. D. (2001). Nature, 409, 338-340.
49	Heliconius erato	Nymphalidae	Aposematic	Arias, M. et al. (2016). Evolutionary Ecology, 30(3), 419-433. Brower et al 1963.
50	Heliconius ethilla	Nymphalidae	Aposematic	Pinheiro, C. E. G., & de Campos V. C. (2013). Ornitologia Neotropical, 24, 365-367.
51	Heliconius himera	Nymphalidae	Aposematic	Jiggins, C. D., & McMillan, W. O. (1997). Proceedings of the Royal Society of London B: Biological Sciences, 264(1385), 1167-1175.
52	Heliconius melpomene	Nymphalidae	Aposematic	Arias, M. et al. (2016). Evolutionary Ecology, 30(3), 419-433.
53	Heliconius numata	Nymphalidae	Aposematic	Arias, M. et al. (2016). Evolutionary Ecology, 30(3), 419-433.
54	Heliconius sapho	Nymphalidae	Aposematic	Kapan, D. D. (2001). Nature, 409, 338-340.
55	Heliconius sara	Nymphalidae	Aposematic	Trigo, J. R. (2000). Journal of the Brazilian Chemical Society, 11(6), 551-561. Brower et al 1963.
56	Heliconius wallacei	Nymphalidae	Aposematic	Pinheiro, C. E. (1996). Biological Journal of the Linnean Society, 59(4), 351-365.
57	Heliconius xanthocles	Nymphalidae	Aposematic	Pinheiro, C. E. (1996). Biological Journal of the Linnean Society, 59(4), 351-365.
58	Hypoprepia fucosa	Erebidae	Aposematic	Scott, C. H. et al. (2014). Systematic Entomology, 39(2), 286-303.
59	Hypothyris daphnis	Nymphalidae	Aposematic	Pinheiro, C. E. (1996). Biological Journal of the Linnean Society, 59(4), 351-365.
60	Hypothyris ninonia	Nymphalidae	Aposematic	Pinheiro, C. E. (1996). Biological Journal of the Linnean Society, 59(4), 351-365.
61	Limenitis archippus	Nymphalidae	Aposematic	Ritland, D. B. (1995). Oecologia, 103(3), 327-336.
62	Mapeta xanthomelas	Pyralidae	Aposematic	Durán, J. et al. (2012). Journal of Chemical Ecology, 38(10), 1285-1288.
63	Mechanitis mazaeus	Nymphalidae	Aposematic	Pinheiro, C. E. (1996). Biological Journal of the Linnean Society, 59(4), 351-365.
64	Melanargia galathea	Nymphalidae	Aposematic	Dennis, R. L., & Shreeve, T. G. (2004). Royal Entomological Society, 28(3), 139-148.
65	Melinaea mneme	Nymphalidae	Aposematic	Pinheiro, C. E. (1996). Biological Journal of the Linnean Society, 59(4), 351-365.
66	Melitaea athalia	Nymphalidae	Aposematic	Tesarova, M. et al. (2013). Ecological Entomology, 38(2), 155-163.
67	Melitaea aurelia	Nymphalidae	Aposematic	Tesarova, M. et al. (2013). Ecological Entomology, 38(2), 155-163.
68	Melitaea didyma	Nymphalidae	Aposematic	Tesarova, M. et al. (2013). Ecological Entomology, 38(2), 155-163.
69	Nica flavilla	Nymphalidae	Aposematic	Trigo, J. R. (2000). Journal of the Brazilian Chemical Society, 11(6), 551-561.
70	Ornithoptera goliath	Papilionidae	Aposematic	Opitz, S. E., & Müller, C. (2009). Chemoecology, 19(3), 117-154.
71	Pachliopta aristolochiae	Papilionidae	Aposematic	Klitzke, C. F., & Brown Jr, K. S. (2000). Chemoecology, 10(2), 99-102.
72	Parasemia plantaginis	Erebidae	Aposematic	Lindstedt, C. et al. (2011). Behavioral Ecology, 22(3), 580-587.
73	Parides agavus	Papilionidae	Aposematic	Morais, A. D., & Brown, K. S. (1991). J Res Lepid,30(1-2), 19-37.
74	Parides anchises	Papilionidae	Aposematic	Morais, A. D., & Brown, K. S. (1991). J Res Lepid,30(1-2), 19-37.
75	Parides bunichus	Papilionidae	Aposematic	Morais, A. D., & Brown, K. S. (1991). J Res Lepid,30(1-2), 19-37.
76	Parides childrenae	Papilionidae	Aposematic	Klitzke, C. F., & Brown Jr, K. S. (2000). Chemoecology, 10(2), 99-102.
77	Parides erithalion	Papilionidae	Aposematic	Klitzke, C. F., & Brown Jr, K. S. (2000). Chemoecology, 10(2), 99-102.
78	Parides lycimenes	Papilionidae	Aposematic	Klitzke, C. F., & Brown Jr, K. S. (2000). Chemoecology, 10(2), 99-102.
79	Parides lysander	Papilionidae	Aposematic	Pinheiro, C. E. (1996). Biological Journal of the Linnean Society, 59(4), 351-365.
80	Parides neophilus	Papilionidae	Aposematic	Pinheiro, C. E. (1996). Biological Journal of the Linnean Society, 59(4), 351-365.
81	Parides proneus	Papilionidae	Aposematic	Morais, A. D., & Brown, K. S. (1991). J Res Lepid,30(1-2), 19-37.
82	Parnassius phoebus	Papilionidae	Aposematic	Nishida, R., & Rothschild, M. (1995). Experientia, 51(3), 267-269.
83	Pieris rapae	Pieridae	Aposematic	Srygley, R. B., & Kingsolver, J. G. (1998). Biological Journal of the Linnean Society, 64(1), 41-55.
84	Placidula euryanassa	Nymphalidae	Aposematic	Freitas, A. V. L. et al. (1996). Chemoecology, 7, 61-67.
85	Poladryas arachne	Nymphalidae	Aposematic	Trigo, J. R. (2000). Journal of the Brazilian Chemical Society, 11(6), 551-561. L'Empereur 1989, unpubl thesis.
86	Pontia occidentalis	Pieridae	Aposematic	Srygley, R. B., & Kingsolver, J. G. (1998). Biological Journal of the Linnean Society, 64(1), 41-55.
87	Spilosoma lubricipeda	Erebidae	Aposematic	Von Nickisch-Rosenegk, E., & Wink, M. (1993). Journal of Chemical Ecology, 19(9), 1889-1903.
88	Stalachtis phlegia	Riodinidae	Aposematic	Pinheiro, C. E. (1996). Biological Journal of the Linnean Society, 59(4), 351-365.
89	Syntomeida epilais	Erebidae	Aposematic	Von Nickisch-Rosenegk, E., & Wink, M. (1993). Journal of Chemical Ecology, 19(9), 1889-1903.
90	Taenaris onolaus	Nymphalidae	Aposematic	Nash, R. J., Bell, E. A., & Ackery, P. R. (1992). Phytochemistry, 31(6), 1955-1957.
91	Thessalia leanira	Nymphalidae	Aposematic	Mead, E. W. et al. (1993). Journal of Chemical Ecology, 19(6), 1155-1166.
92	Urania fulgens	Uraniidae	Aposematic	Harborne, J. B. (2001). Natural Product Reports, 18(4), 361-379.
93	Utetheisa galapagensis	Erebidae	Aposematic	Garrett, S. E. et al. (2008). Galápagos Research, 65, 2-6.
94	Zerenopsis lepida	Geometridae	Aposematic	Donaldson, J. S., & Bösenberg, J. D. (1995). African Entomology, 3(2), 103-110.
95	Zygaena filipendulae	Zygaenidae	Aposematic	Nash, R. J., & Watson, A. A. (1994). Chemoecology, 5(3-4), 167-171.
96	Zygaena trifolii	Zygaenidae	Aposematic	Harborne, J. B. (2001). Natural Product Reports, 18(4), 361-379.
97	Agrotis exclamationis	Noctuidae	Non-aposematic	Riccucci, M., & Lanza, B. (2014). Vespertilio, 17, 161–169.
98	Aphrissa boisduvalii	Pieridae	Non-aposematic	Srygley, R. B., & Chai, P. (1990). Oecologia, 84(4), 491-499.
99	Aphrissa statira	Pieridae	Non-aposematic	Burger, J., & Gochfeld, M. (2001). Behavioral Ecology and Sociobiology, 49(6), 482-492.
100	Appias drusilla	Pieridae	Non-aposematic	Chai, P. (1996). Biological Journal of the Linnean Society, 59(1), 37-67.
101	Ascalapha odorata	Erebidae	Non-aposematic	Collins, C. T., & Watson, A. (1983). Biotropica, 15(1), 53- 60.
102	Ascotis selenaria	Geometridae	Non-aposematic	Wysoki, M. et al. (1974). California Avocado Society Yearbook, 58, 77-82.
103	Autographa gamma	Noctuidae	Non-aposematic	Riccucci, M., & Lanza, B. (2014). Vespertilio, 17, 161–169.
104	Biston betularia	Geometridae	Non-aposematic	Cook, L. M. et al. (2012). Biology Letters, 8(4), 609-612.
105	Cercyonis pegala	Nymphalidae	Non-aposematic	Bowers, M. D., & Wiernasz, D. C. (1979). Ecological Entomology, 4(3), 205-209.
106	Colobura dirce	Nymphalidae	Non-aposematic	Chai, P. (1996). Biological Journal of the Linnean Society, 59(1), 37-67.
107	Colotois pennaria	Geometridae	Non-aposematic	Miková, E. et al. (2013). Central European Journal of Biology, 8(9), 848–853.
108	Eunica monima	Nymphalidae	Non-aposematic	Burger, J., & Gochfeld, M. (2001). Behavioral Ecology and Sociobiology, 49(6), 482-492.
109	Eutrapela clemataria	Geometridae	Non-aposematic	Burford, L. S., & Lacki, M. J. (1988). The American Midland Naturalist 139(1), 141-146. No Access.
110	Galleria mellonella	Pyralidae	Non-aposematic	Bowers, M. D., & Farley, S. (1990). Animal Behaviour, 39(4), 699-705.
111	Hamadryas chloe	Nymphalidae	Non-aposematic	Pinheiro, C. E. (1996). Biological Journal of the Linnean Society, 59(4), 351-365.
112	Historis odius	Nymphalidae	Non-aposematic	Pinheiro, C. E. (1996). Biological Journal of the Linnean Society, 59(4), 351-365.
113	Junonia coenia	Nymphalidae	Non-aposematic	Bowers, M. D., & Farley, S. (1990). Animal Behaviour, 39(4), 699-705.
114	Marpesia chiron	Nymphalidae	Non-aposematic	Pinheiro, C. E. (1996). Biological Journal of the Linnean Society, 59(4), 351-365.
115	Marpesia norica	Nymphalidae	Non-aposematic	Pinheiro, C. E. G., & Martins, M. (1992). Journal of the Lepidopterists' Society, 46(1), 77-79.
116	Oeneis jutta	Nymphalidae	Non-aposematic	Krzysztofiak, L. et al. (2009). Polish Journal of Entomology, 78, 265-275.
117	Ourapteryx sambucaria	Geometridae	Non-aposematic	Riccucci, M., & Lanza, B. (2014). Vespertilio, 17, 161–169.
118	Peribatodes rhomboidaria	Geometridae	Non-aposematic	Aizpurua et al (2018). Molecular Ecology, 2018, 1-11.
119	Pero ancetaria	Geometridae	Non-aposematic	Clare et al. (2009). Molecular Ecology, 18(11), 2532-2542.
120	Phoebis argante	Pieridae	Non-aposematic	Chai, P. (1996). Biological Journal of the Linnean Society, 59(1), 37-67.
121	Pierella luna	Nymphalidae	Non-aposematic	Srygley, R. B., & Chai, P. (1990). Oecologia, 84(4), 491-499.
122	Sphacelodes vulneraria	Geometridae	Non-aposematic	Rolfe, A. K. et al. (2014). Journal of Mammalogy, 95(3), 587-596.
123	Temenis laothoe	Nymphalidae	Non-aposematic	Pinheiro, C. E. G., & Martins, M. (1992). Journal of the Lepidopterists' Society, 46(1), 77-79.
124	Thera obeliscata	Geometridae	Non-aposematic	Eeva, T. et al. (2010). Journal of Chemical Ecology, 36(6), 608-613.
125	Zaretis ellops	Nymphalidae	Non-aposematic	Chai, P. (1996). Biological Journal of the Linnean Society, 59(1), 37-67.
