# Supplementary material for: Understanding the design of warning signals: a predator’s view
Source: Research Square preprint supplement (doi:10.21203/rs.3.rs-777244/v1), 2021-08-13
Supplement: Supplementary file 2 [file 74babc60d1fc0322f4eb2399.xlsx]

## Sheet: Sheet1
Specimen number	Species number	Scan name	Species	Genus	Family	Date scanned	Aposematic/non-aposematic	Collection	NHMUK collection number	Included in analysis	Reason for exclusion	Luminance energy	Isotropy departure	Colour energy
1	1	Abraxas fulvobasalis_1D_040917	Abraxas fulvobasalis	Abraxas	Geometridae	09/04/17	Aposematic	NHM	NHM_71-609.5	yes		0.0257012676004801	0.115117125416667	0.0223261205692119
2	1	Abraxas fulvobasalis_1V_040917	Abraxas fulvobasalis	Abraxas	Geometridae	09/04/17	Aposematic	NHM	NHM_71-609.5	yes		0.0247645593094915	0.116567298414100	0.0119535114054374
3	1	Abraxas fulvobasalis_2D_040917	Abraxas fulvobasalis	Abraxas	Geometridae	09/04/17	Aposematic	NHM	NHM_71-609.5	yes		0.0263893822433626	0.117077763212733	0.0259699040417365
4	1	Abraxas fulvobasalis_2V_040917	Abraxas fulvobasalis	Abraxas	Geometridae	09/04/17	Aposematic	NHM	NHM_71-609.5	yes		0.0254678382635429	0.117235330221002	0.0134159221392149
5	2	Abraxas grossulariata_1D_070218	Abraxas grossulariata	Abraxas	Geometridae	02/07/18	Aposematic	Manchester		yes		0.0424672067964807	0.116663502685121	0.0377609465077629
6	2	Abraxas grossulariata_1V_070218	Abraxas grossulariata	Abraxas	Geometridae	02/07/18	Aposematic	Manchester		yes		0.0383748310578274	0.117233197845885	0.0327730895307291
7	2	Abraxas grossulariata_2D_070218	Abraxas grossulariata	Abraxas	Geometridae	02/07/18	Aposematic	Manchester		yes		0.0466961507685053	0.117857496191153	0.0415101070566006
8	2	Abraxas grossulariata_2V_070218	Abraxas grossulariata	Abraxas	Geometridae	02/07/18	Aposematic	Manchester		yes		0.0403434426432059	0.117122472493960	0.0367538910451672
9	3	Abraxis latifasciata_1D_070218	Abraxas latifasciata	Abraxas	Geometridae	02/07/18	Aposematic	AMNH		yes		0.0189198425355726	0.111788651204012	0.0335767883859265
10	3	Abraxis latifasciata_1V_070218	Abraxas latifasciata	Abraxas	Geometridae	02/07/18	Aposematic	AMNH		yes		0.0204418506098115	0.112345446671504	0.0233385787792836
11	4	Abraxas miranda_1D_040917	Abraxas miranda	Abraxas	Geometridae	09/04/17	Aposematic	NHM	NHM_70.252-20	yes		0.0243896693734317	0.117067155659539	0.0263545360247658
12	4	Abraxas miranda_1V_040917	Abraxas miranda	Abraxas	Geometridae	09/04/17	Aposematic	NHM	NHM_70.252-20	yes		0.0244662583642781	0.118040145943139	0.0139611762786491
13	4	Abraxas miranda_2D_040917	Abraxas miranda	Abraxas	Geometridae	09/04/17	Aposematic	NHM	NHM_70.252-20	yes		0.0269138470457420	0.117342276744903	0.0263731546105314
14	4	Abraxas miranda_2V_040917	Abraxas miranda	Abraxas	Geometridae	09/04/17	Aposematic	NHM	NHM_70.252-20	yes		0.0257631597718365	0.117468767718008	0.0174955546484664
15	5	Abraxas niphonibia_1D_040917	Abraxas niphonibia	Abraxas	Geometridae	09/04/17	Aposematic	NHM	NHM_70.252-20	yes		0.0274844442694067	0.116502704782308	0.0219611306193159
16	5	Abraxas niphonibia_1V_040917	Abraxas niphonibia	Abraxas	Geometridae	09/04/17	Aposematic	NHM	NHM_70.252-20	yes		0.0274378778033543	0.115382557940368	0.0142177451374842
17	5	Abraxas niphonibia_2D_040917	Abraxas niphonibia	Abraxas	Geometridae	09/04/17	Aposematic	NHM	NHM_70.252-20	yes		0.0275102285102640	0.116771879748438	0.0193450537907566
18	5	Abraxas niphonibia_2V_040917	Abraxas niphonibia	Abraxas	Geometridae	09/04/17	Aposematic	NHM	NHM_70.252-20	yes		0.0288273774078705	0.115801436808217	0.0179210529640943
19	6	Actinote anteas_1D_170517	Actinote anteas	Actinote	Nymphalidae	17/05/17	Aposematic	NHM	NHM_02.081-4	yes		0.0297176425301692	0.121199762735093	0.0488668664746704
20	6	Actinote anteas_1V_170517	Actinote anteas	Actinote	Nymphalidae	17/05/17	Aposematic	NHM	NHM_02.081-4	yes		0.0302488671152079	0.124162434083467	0.0178134023080921
21	6	Actinote anteas_2D_170517	Actinote anteas	Actinote	Nymphalidae	17/05/17	Aposematic	NHM	NHM_7-380	yes		0.0329600220540424	0.119050458892472	0.0429742303817772
22	6	Actinote anteas_2V_170517	Actinote anteas	Actinote	Nymphalidae	17/05/17	Aposematic	NHM	NHM_7-380	yes		0.0318648712563127	0.119256093106071	0.0171193172930856
23	7	Adelpha bredowii_1D_050717	Adelpha bredowii	Adelpha	Nymphalidae	07/05/17	Aposematic	NHM	NHM_8a-179	yes		0.0400870386247897	0.116790826762445	0.0580174925501450
24	7	Adelpha bredowii_1V_050717	Adelpha bredowii	Adelpha	Nymphalidae	07/05/17	Aposematic	NHM	NHM_8a-179	yes		0.0442844834173074	0.116608793591594	0.0576215765988445
25	7	Adelpha bredowii_2D_050717	Adelpha bredowii	Adelpha	Nymphalidae	07/05/17	Aposematic	NHM	NHM_8a-179	yes		0.0366222000540830	0.115991314013595	0.0543578997350233
26	7	Adelpha bredowii_2V_050717	Adelpha bredowii	Adelpha	Nymphalidae	07/05/17	Aposematic	NHM	NHM_8a-179	yes		0.0437527323880999	0.116523916133088	0.0607231646813301
27	8	Aeria olena_1D_070218	Aeria olena	Aeria	Nymphalidae	02/07/18	Aposematic	AMNH		yes		0.0338879605705437	0.116501860754237	0.0323879231834711
28	8	Aeria olena_1V_070218	Aeria olena	Aeria	Nymphalidae	02/07/18	Aposematic	AMNH		yes		0.0277640287821619	0.115987852026241	0.0240874642420681
29	9	Aglais urticae_1D_030717	Aglais urticae	Aglais	Nymphalidae	07/03/17	Aposematic	NHM	NHM_89-31	yes		0.0385966408310603	0.115775081191750	0.0893861506671985
30	9	Aglais urticae_1V_030717	Aglais urticae	Aglais	Nymphalidae	07/03/17	Aposematic	NHM	NHM_89-31	yes		0.0366302401348500	0.113710609658516	0.0217726820980749
31	9	Aglais urticae_2D_030717	Aglais urticae	Aglais	Nymphalidae	07/03/17	Aposematic	NHM	NHM_89-31	yes		0.0373336388417837	0.115190420815369	0.0868292572428856
32	9	Aglais urticae_2V_030717	Aglais urticae	Aglais	Nymphalidae	07/03/17	Aposematic	NHM	NHM_89-31	yes		0.0346348552179060	0.114288501342037	0.0229050418076876
33	10	Agraulis vanillae_1D_040717	Agraulis vanillae	Agraulis	Nymphalidae	07/04/17	Aposematic	NHM	NHM_Ma 42344	yes		0.0376045571782479	0.123235377670603	0.0618737615262794
34	10	Agraulis vanillae_1V_040717	Agraulis vanillae	Agraulis	Nymphalidae	07/04/17	Aposematic	NHM	NHM_Ma 42344	yes		0.0502328064664701	0.126710970434742	0.0542086898825825
35	10	Agraulis vanillae_2D_040717	Agraulis vanillae	Agraulis	Nymphalidae	07/04/17	Aposematic	NHM	NHM_Ma 42344	yes		0.0293183548164565	0.118607515575079	0.0712042623976411
36	10	Agraulis vanillae_2V_040717	Agraulis vanillae	Agraulis	Nymphalidae	07/04/17	Aposematic	NHM	NHM_Ma 42344	yes		0.0370963254809164	0.124090166751481	0.0554866681408395
37	11	Amauris echeria_1D_040717	Amauris echeria	Amauris	Nymphalidae	07/04/17	Aposematic	NHM	NHM_Ma 41956	yes		0.0443683535405861	0.121228637357204	0.0348226145166867
38	11	Amauris echeria_1V_040717	Amauris echeria	Amauris	Nymphalidae	07/04/17	Aposematic	NHM	NHM_Ma 41956	yes		0.0433437069436819	0.124274829323503	0.0318227266644670
39	11	Amauris echeria_2D_040717	Amauris echeria	Amauris	Nymphalidae	07/04/17	Aposematic	NHM	NHM_Ma 41956	yes		0.0391048349864151	0.118850049348946	0.0414942079051505
40	11	Amauris echeria_2V_040717	Amauris echeria	Amauris	Nymphalidae	07/04/17	Aposematic	NHM	NHM_Ma 41956	yes		0.0378861442517156	0.120595431842208	0.0351322739001861
41	12	Amauris niavius_1D_170517	Amauris niavius	Amauris	Nymphalidae	17/05/17	Aposematic	NHM	NHM_Ma 41636	yes		0.0433693199244260	0.120230944079860	0.0420825690608989
42	12	Amauris niavius_1V_170517	Amauris niavius	Amauris	Nymphalidae	17/05/17	Aposematic	NHM	NHM_Ma 41636	yes		0.0420663240277377	0.121968318463543	0.0412736210988216
43	12	Amauris niavius_2D_170517	Amauris niavius	Amauris	Nymphalidae	17/05/17	Aposematic	NHM	NHM_Ma 41636	yes		0.0414941442330565	0.119419989275491	0.0389544782429444
44	12	Amauris niavius_2V_170517	Amauris niavius	Amauris	Nymphalidae	17/05/17	Aposematic	NHM	NHM_Ma 41636	yes		0.0418102283190354	0.122387658263496	0.0381938435284605
45	13	Arctia caja_1D_030717	Arctia caja	Arctia	Erebidae	07/03/17	Aposematic	NHM	NHMG_G10.1.11	yes		0.0444702018498656	0.120460434144571	0.0550214520019319
46	13	Arctia caja_1V_030717	Arctia caja	Arctia	Erebidae	07/03/17	Aposematic	NHM	NHMG_G10.1.11	yes		0.0349401600846304	0.117179620316486	0.0506257689399946
47	13	Arctia caja_2D_030717	Arctia caja	Arctia	Erebidae	07/03/17	Aposematic	NHM	NHMG_G10.1.11	yes		0.0457188345706830	0.119573885280141	0.0666653521902472
48	13	Arctia caja_2V_030717	Arctia caja	Arctia	Erebidae	07/03/17	Aposematic	NHM	NHMG_G10.1.11	yes		0.0376698094295797	0.118107578068067	0.0444063067068156
49	14	Arctia villica_1D_030717	Arctia villica / Epicallia villica	Arctia	Erebidae	07/03/17	Aposematic	NHM	NHMG_G3.11.10	yes		0.0478092046851767	0.121650426302196	0.0450866971277891
50	14	Arctia villica_1V_030717	Arctia villica / Epicallia villica	Arctia	Erebidae	07/03/17	Aposematic	NHM	NHMG_G3.11.11	yes		0.0374430367106838	0.119197265798877	0.0763512463414882
51	14	Arctia villica_2D_030717	Arctia villica / Epicallia villica	Arctia	Erebidae	07/03/17	Aposematic	NHM	NHMG_G3.11.12	yes		0.0488558366623328	0.122181764417879	0.0610880572652957
52	14	Arctia villica_2V_030717	Arctia villica / Epicallia villica	Arctia	Erebidae	07/03/17	Aposematic	NHM	NHMG_G3.11.13	yes		0.0385101013777541	0.119723583388910	0.0817704991750998
53	14	Arctia villica_1D_080218	Arctia villica / Epicallia villica	Arctia	Erebidae	02/08/18	Aposematic	NHM	NHMG_G3.11.10	yes		0.0489506140050844	0.121015543795110	0.0499514243644876
54	14	Arctia villica_1V_080218	Arctia villica / Epicallia villica	Arctia	Erebidae	02/08/18	Aposematic	NHM	NHMG_G3.11.11	yes		0.0371078828081589	0.117880902854767	0.0820783703999843
55	14	Arctia villica_2D_080218	Arctia villica / Epicallia villica	Arctia	Erebidae	02/08/18	Aposematic	NHM	NHMG_G3.11.12	yes		0.0478324654713180	0.120095843690960	0.0613383908687854
56	14	Arctia villica_2V_080218	Arctia villica / Epicallia villica	Arctia	Erebidae	02/08/18	Aposematic	NHM	NHMG_G3.11.13	yes		0.0371537813916118	0.118509140160468	0.0749390840212802
57	15	Argina astrea_1D_080218	Argina astrea	Argina	Erebidae	02/08/18	Aposematic	Manchester		yes		0.0274632989482761	0.117344564522418	0.0302692488766770
58	15	Argina astrea_1V_080218	Argina astrea	Argina	Erebidae	02/08/18	Aposematic	Manchester		yes		0.0317691540391615	0.116096600715703	0.0197662383239165
59	15	Argina astrea_2D_080218	Argina astrea	Argina	Erebidae	02/08/18	Aposematic	Manchester		yes		0.0288901661371809	0.116265024588145	0.0226675858233527
60	15	Argina astrea_2V_080218	Argina astrea	Argina	Erebidae	02/08/18	Aposematic	Manchester		yes		0.0334212800683040	0.115578161021408	0.0216557206661635
61	16	Arichanna gaschkevitchii_1D_160517	Arichanna gaschkevitchii	Arichanna	Geometridae	17/05/16	Aposematic	NHM	NHMG_G14.8.7	yes		0.0330642132178266	0.116934812000063	0.0230502140720535
62	16	Arichanna gaschkevitchii_1V_160517	Arichanna gaschkevitchii	Arichanna	Geometridae	17/05/16	Aposematic	NHM	NHMG_G14.8.7	yes		0.0273650499491202	0.115594627183445	0.0201352355112110
63	16	Arichanna gaschkevitchii_2D_160517	Arichanna gaschkevitchii	Arichanna	Geometridae	17/05/16	Aposematic	NHM	NHMG_G14.8.7	yes		0.0292330758225444	0.116464819110755	0.0198557020259729
64	16	Arichanna gaschkevitchii_2V_160517	Arichanna gaschkevitchii	Arichanna	Geometridae	17/05/16	Aposematic	NHM	NHMG_G14.8.7	yes		0.0241620807784082	0.115657501889421	0.0192600814505239
65	17	Arichanna melanaria_1D_160517	Arichanna melanaria	Arichanna	Geometridae	17/05/16	Aposematic	NHM	NHMG_G14.8.7	yes		0.0369738768527220	0.113827901009463	0.0230987769191760
66	17	Arichanna melanaria_1V_160517	Arichanna melanaria	Arichanna	Geometridae	17/05/16	Aposematic	NHM	NHMG_G14.8.7	yes		0.0317812539057412	0.113508837721172	0.0122506610669401
67	17	Arichanna melanaria_2D_160517	Arichanna melanaria	Arichanna	Geometridae	17/05/16	Aposematic	NHM	NHMG_G14.8.7	yes		0.0382196079780349	0.115723379091166	0.0251279129205570
68	17	Arichanna melanaria_2V_160517	Arichanna melanaria	Arichanna	Geometridae	17/05/16	Aposematic	NHM	NHMG_G14.8.7	yes		0.0372800425323529	0.115311482707678	0.0147919490842424
69	17	Arichanna_melanaria_1D_060318	Arichanna melanaria	Arichanna	Geometridae	03/06/18	Aposematic	NHM	NHMG_G14.8.7	yes		0.0425022441657240	0.115047713865342	0.0232875631985568
70	17	Arichanna_melanaria_1V_060318	Arichanna melanaria	Arichanna	Geometridae	03/06/18	Aposematic	NHM	NHMG_G14.8.7	yes		0.0342259975795540	0.114045298533253	0.0180712671180691
71	18	Astraptres creteus_1D_07092017	Astraptes creteus	Astraptes	Hesperiidae	09/07/20	Aposematic	NHM	NHM_G.13.24.11	yes		0.0237083352850957	0.112449777927013	0.0526516903928872
72	18	Astraptres creteus_1V_07092017	Astraptes creteus	Astraptes	Hesperiidae	09/07/20	Aposematic	NHM	NHM_G.13.24.11	yes		0.0222150998067016	0.112285398679259	0.0291797063110368
73	18	Astraptres creteus_2D_07092017	Astraptes creteus	Astraptes	Hesperiidae	09/07/20	Aposematic	NHM	NHM_G.13.24.11	yes		0.0266843629663381	0.114806952228355	0.0460934617952833
74	18	Astraptres creteus_2V_07092017	Astraptes creteus	Astraptes	Hesperiidae	09/07/20	Aposematic	NHM	NHM_G.13.24.11	yes		0.0291285159607014	0.115640943556512	0.0308411231434889
75	19	Battus archidamus_1D_060717	Battus archidamus	Battus	Papilionidae	07/06/17	Aposematic	NHM	NHM_G.17.12.7	yes		0.0389311570936845	0.116429996805737	0.0157644848817474
76	19	Battus archidamus_1V_060717	Battus archidamus	Battus	Papilionidae	07/06/17	Aposematic	NHM	NHM_G.17.12.7	yes		0.0423096770665746	0.117481074356609	0.0212233295380736
77	19	Battus archidamus_2D_060717	Battus archidamus	Battus	Papilionidae	07/06/17	Aposematic	NHM	NHM_G.17.14.9	yes		0.0359879558000844	0.116404702690220	0.0155116209477148
78	19	Battus archidamus_2V_060717	Battus archidamus	Battus	Papilionidae	07/06/17	Aposematic	NHM	NHM_G.17.14.9	yes		0.0426363526195480	0.118678848064115	0.0291491004645133
79	20	Battus belus_1D_180517	Battus belus	Battus	Papilionidae	17/05/18	Aposematic	NHM	NHM_G.17.14.9	yes		0.0316257510598778	0.116741883951841	0.0194460757059876
80	20	Battus belus_1V_180517	Battus belus	Battus	Papilionidae	17/05/18	Aposematic	NHM	NHM_G.17.14.9	yes		0.0348394143743927	0.123083591085411	0.0368917252191066
81	20	Battus belus_2D_180517	Battus belus	Battus	Papilionidae	17/05/18	Aposematic	NHM	NHM_G.23.4.7	yes		0.0296734822932115	0.115310315715603	0.0175606015890839
82	20	Battus belus_2V_180517	Battus belus	Battus	Papilionidae	17/05/18	Aposematic	NHM	NHM_G.23.4.7	yes		0.0330932773595193	0.120296978773527	0.0376297294031728
83	21	Battus crassus_1D_060717	Battus crassus	Battus	Papilionidae	07/06/17	Aposematic	NHM	NHM_G.23.4.7	yes		0.0329576522500375	0.115719273881521	0.0304978257823590
84	21	Battus crassus_1V_060717	Battus crassus	Battus	Papilionidae	07/06/17	Aposematic	NHM	NHM_G.23.4.7	yes		0.0371711605132549	0.118760071082708	0.0368235375683889
85	21	Battus crassus_2D_060717	Battus crassus	Battus	Papilionidae	07/06/17	Aposematic	NHM	NHM_G.38.2.11	yes		0.0378562061889805	0.116421831210441	0.0237827194490635
86	21	Battus crassus_2V_060717	Battus crassus	Battus	Papilionidae	07/06/17	Aposematic	NHM	NHM_G.38.2.11	yes		0.0369089873937616	0.117579284552718	0.0331549774574272
87	22	Battus philenor_1D_060717	Battus philenor	Battus	Papilionidae	07/06/17	Aposematic	NHM	NHM_G.42.12.10	yes		0.0236929421638896	0.114536807617457	0.0226857219546934
88	22	Battus philenor_1V_060717	Battus philenor	Battus	Papilionidae	07/06/17	Aposematic	NHM	NHM_G.42.12.10	yes		0.0370654516918281	0.119648154797108	0.0397007181933159
89	22	Battus philenor_2D_060717	Battus philenor	Battus	Papilionidae	07/06/17	Aposematic	NHM	NHM_G.43.13.1	yes		0.0269368777426579	0.115442153712485	0.0255284785917730
90	22	Battus philenor_2V_060717	Battus philenor	Battus	Papilionidae	07/06/17	Aposematic	NHM	NHM_G.43.13.1	yes		0.0359276669623711	0.118381965782334	0.0489094379484621
91	23	Battus polydamas_1D_180517	Battus polydamas	Battus	Papilionidae	17/05/18	Aposematic	NHM	NHM_G.43.13.1	yes		0.0382676255717953	0.117714734069187	0.0170986066566143
92	23	Battus polydamas_1V_180517	Battus polydamas	Battus	Papilionidae	17/05/18	Aposematic	NHM	NHM_G.43.13.1	yes		0.0372536111666827	0.120450946713271	0.0318128965638578
93	23	Battus polydamas_2D_180517	Battus polydamas	Battus	Papilionidae	17/05/18	Aposematic	NHM	NHM_G.43.3.13	yes		0.0374587265169453	0.118161686574804	0.0142993512144551
94	23	Battus polydamas_2V_180517	Battus polydamas	Battus	Papilionidae	17/05/18	Aposematic	NHM	NHM_G.43.3.13	yes		0.0352801128380100	0.119077038236802	0.0291686742905408
95	24	Biblis hyperia_1D_050717	Biblis hyperia	Biblis	Nymphalidae	07/05/17	Aposematic	NHM	NHM_G.43.3.13	yes		0.0316194379213357	0.116778085459195	0.0894808482816480
96	24	Biblis hyperia_1V_050717	Biblis hyperia	Biblis	Nymphalidae	07/05/17	Aposematic	NHM	NHM_G.43.3.13	yes		0.0240800853797776	0.115456830223097	0.0368855787672691
97	24	Biblis hyperia_2D_050717	Biblis hyperia	Biblis	Nymphalidae	07/05/17	Aposematic	NHM	NHM_G.43.3.6	yes		0.0311585287222075	0.115911606006103	0.0617390397695344
98	24	Biblis hyperia_2V_050717	Biblis hyperia	Biblis	Nymphalidae	07/05/17	Aposematic	NHM	NHM_G.43.3.6	yes		0.0293746322957344	0.116551808149468	0.0265808348111086
99	25	Caligo_beltrao_1D_060318	Caligo beltrao	Caligo	Nymphalidae	03/06/18	Aposematic	Manchester		yes		0.0200824194668684	0.114666136364377	0.0812004451972316
100	25	Caligo_beltrao_1V_060318	Caligo beltrao	Caligo	Nymphalidae	03/06/18	Aposematic	Manchester		yes		0.0402998437850110	0.113061242920326	0.0411551778089302
101	26	Callicore astarte_1D_180517	Callicore astarte	Callicore	Nymphalidae	17/05/18	Aposematic	NHM	NHM_G.23.4.4	yes		0.0378360704112845	0.117498366187811	0.205546233111643
102	26	Callicore astarte_1V_180517	Callicore astarte	Callicore	Nymphalidae	17/05/18	Aposematic	NHM	NHM_G.23.4.4	yes		0.0592437562333327	0.119011748911216	0.0968440841737786
103	26	Callicore astarte_2D_180517	Callicore astarte	Callicore	Nymphalidae	17/05/18	Aposematic	NHM	NHM_G.23.4.4	yes		0.0320961050368404	0.115101820029617	0.137446552574182
104	26	Callicore astarte_2V_180517	Callicore astarte	Callicore	Nymphalidae	17/05/18	Aposematic	NHM	NHM_G.23.4.4	yes		0.0579978281031830	0.117181751715621	0.0934960504002353
105	26	Callicore astarte_3D_180517	Callicore astarte	Callicore	Nymphalidae	17/05/18	Aposematic	NHM	NHM_G.23.4.4	yes		0.0313551473515386	0.116531441609087	0.0434637632143155
106	26	Callicore astarte_3V_180517	Callicore astarte	Callicore	Nymphalidae	17/05/18	Aposematic	NHM	NHM_G.23.4.4	yes		0.0623153416884662	0.118815862535982	0.0382920755566751
107	26	Callicore astarte_4D_180517	Callicore astarte	Callicore	Nymphalidae	17/05/18	Aposematic	NHM	NHM_G.23.4.4	yes		0.0290499415466593	0.117663107317425	0.0496181769309753
108	26	Callicore astarte_4V_180517	Callicore astarte	Callicore	Nymphalidae	17/05/18	Aposematic	NHM	NHM_G.23.4.4	yes		0.0601220093559220	0.117984486923530	0.0371008269993128
109	26	Callicore astarte_5D_180517	Callicore astarte	Callicore	Nymphalidae	17/05/18	Aposematic	NHM	NHM_G.23.4.4	yes		0.0335801171255191	0.116902473561551	0.106510301774121
110	26	Callicore astarte_5V_180517	Callicore astarte	Callicore	Nymphalidae	17/05/18	Aposematic	NHM	NHM_G.23.4.4	yes		0.0610013428106265	0.118583276102651	0.0855346531839330
111	26	Callicore astarte_6D_180517	Callicore astarte	Callicore	Nymphalidae	17/05/18	Aposematic	NHM	NHM_G.37.4.2	yes		0.0337742347050035	0.118631078292361	0.0849408103936418
112	26	Callicore astarte_6V_180517	Callicore astarte	Callicore	Nymphalidae	17/05/18	Aposematic	NHM	NHM_G.37.4.2	yes		0.0563430001609683	0.118358226228616	0.0630689461482170
113	27	Colias eurytheme_1D_050417	Colias eurytheme	Colias	Pieridae	04/05/17	Aposematic			yes		0.0328928131934295	0.117026873627145	0.0413105651819793
114	27	Colias eurytheme_1V_050417	Colias eurytheme	Colias	Pieridae	04/05/17	Aposematic			yes		0.0190025556431802	0.117222038528206	0.0126749561225904
115	27	Colias eurytheme_2D_050417	Colias eurytheme	Colias	Pieridae	04/05/17	Aposematic			yes		0.0282588136879820	0.116797197076082	0.0403065289865265
116	27	Colias eurytheme_2V_050417	Colias eurytheme	Colias	Pieridae	04/05/17	Aposematic			yes		0.0187309799648819	0.117439391921078	0.00850221121606077
117	27	Colias eurytheme_3D_060417	Colias eurytheme	Colias	Pieridae	04/06/17	Aposematic			yes		0.0272377933029605	0.114411534740177	0.0409474555177265
118	27	Colias eurytheme_3V_060417	Colias eurytheme	Colias	Pieridae	04/06/17	Aposematic			yes		0.0156933181092014	0.114846089714636	0.0220294233843764
119	27	Colias eurytheme_1D_080218	Colias eurytheme	Colias	Pieridae	02/08/18	Aposematic			yes		0.0282841900730863	0.119655698260521	0.107607989143148
120	27	Colias eurytheme_1V_080218	Colias eurytheme	Colias	Pieridae	02/08/18	Aposematic			yes		0.0175539724731129	0.116847719738569	0.0238372157185726
121	27	Colias eurytheme_2D_080218	Colias eurytheme	Colias	Pieridae	02/08/18	Aposematic			yes		0.0313344815396137	0.115164893473846	0.0644189559254036
122	27	Colias eurytheme_2V_080218	Colias eurytheme	Colias	Pieridae	02/08/18	Aposematic			yes		0.0154142903621520	0.114209557016733	0.0286915503510573
123	28	Composia fidelissima_1D_030717	Composia fidelissima	Composia	Erebidae	07/03/17	Aposematic	NHM	NHM_LG.70.020_13	yes		0.0523007574888902	0.119070459979016	0.0407881276576312
124	28	Composia fidelissima_1V_030717	Composia fidelissima	Composia	Erebidae	07/03/17	Aposematic	NHM	NHM_LG.70.020_13	yes		0.0490544149484208	0.119649762404715	0.0536998899073391
125	28	Composia fidelissima_2D_030717	Composia fidelissima	Composia	Erebidae	07/03/17	Aposematic	NHM	NHM_LG.70.020_13	yes		0.0520037716987562	0.119527099609662	0.0425760132905471
126	28	Composia fidelissima_2V_030717	Composia fidelissima	Composia	Erebidae	07/03/17	Aposematic	NHM	NHM_LG.72.025_1	yes		0.0519706068193116	0.118899271091812	0.0570869314928781
127	29	Cosmosoma myrodora_1D_030717	Cosmosoma myrodora	Cosmosoma	Arctiidae	07/03/17	Aposematic	NHM	NHM_LG.72.025_1	yes		0.0541959314256997	0.116710628928410	0.101473451759589
128	29	Cosmosoma myrodora_1V_030717	Cosmosoma myrodora	Cosmosoma	Arctiidae	07/03/17	Aposematic	NHM	NHM_LG.72.025_1	yes		0.0524103874494545	0.113436828980391	0.0833474024952002
129	29	Cosmosoma myrodora_2D_030717	Cosmosoma myrodora	Cosmosoma	Arctiidae	07/03/17	Aposematic	NHM	NHM_LG.72.025_1	yes		0.0515874920675494	0.118336856052041	0.0935500696147925
130	29	Cosmosoma myrodora_2V_030717	Cosmosoma myrodora	Cosmosoma	Arctiidae	07/03/17	Aposematic	NHM	NHM_LG.72.025_1	yes		0.0528079889220340	0.118665157105781	0.0882023268846402
131	30	Cycnia inopinatus_1D_030717	Cycnia inopinatus	Cycnia	Erebidae	07/03/17	Aposematic	NHM	NHM_LG.72.025_1	yes		0.0177567012471091	0.114324549599602	0.0142932646357253
132	30	Cycnia inopinatus_1V_030717	Cycnia inopinatus	Cycnia	Erebidae	07/03/17	Aposematic	NHM	NHM_LG.72.025_1	yes		0.0168949608252119	0.113803856753869	0.0133415422959369
133	30	Cycnia inopinatus_2D_030717	Cycnia inopinatus	Cycnia	Erebidae	07/03/17	Aposematic	NHM	NHM_LG.72.025_1	yes		0.0182266618725192	0.116647456942086	0.0201902855237274
134	30	Cycnia inopinatus_2V_030717	Cycnia inopinatus	Cycnia	Erebidae	07/03/17	Aposematic	NHM	NHM_LG.97.9.16	yes		0.0179605861372011	0.115115137140747	0.0175781386138207
135	31	Cycnia tenera_1D_030717	Cycnia tenera	Cycnia	Erebidae	07/03/17	Aposematic	NHM	NHM_LG.97.9.16	yes		0.0206711089416018	0.120352627692186	0.0171823486635097
136	31	Cycnia tenera_1V_030717	Cycnia tenera	Cycnia	Erebidae	07/03/17	Aposematic	NHM	NHM_LG.97.9.16	yes		0.0192299588987094	0.118217002913626	0.0126872634867815
137	31	Cycnia tenera_2D_030717	Cycnia tenera	Cycnia	Erebidae	07/03/17	Aposematic	NHM	NHM_LG.97.9.16	yes		0.0217215445164128	0.115052275774158	0.0130520235351188
138	31	Cycnia tenera_2V_030717	Cycnia tenera	Cycnia	Erebidae	07/03/17	Aposematic	NHM	NHM_LG.72.027_1	yes		0.0209034802317828	0.114073871534122	0.0140359960456530
139	32	Danaus chrysippus_1D_040717	Danaus chrysippus	Danaus	Nymphalidae	07/04/17	Aposematic	NHM	NHM_LG.72.027_1	yes		0.0356321091619461	0.118711647820953	0.0427786355026531
140	32	Danaus chrysippus_1V_040717	Danaus chrysippus	Danaus	Nymphalidae	07/04/17	Aposematic	NHM	NHM_LG.72.027_1	yes		0.0437831038022115	0.120227767952465	0.0535392085598068
141	32	Danaus chrysippus_2D_040717	Danaus chrysippus	Danaus	Nymphalidae	07/04/17	Aposematic	NHM	NHM_LG.72.027_1	yes		0.0345081515927384	0.121448941050867	0.0515553817220660
142	32	Danaus chrysippus_2V_040717	Danaus chrysippus	Danaus	Nymphalidae	07/04/17	Aposematic	NHM	NHM_LG.72.026_1	yes		0.0443811549659108	0.122612878851078	0.0518444716921367
143	32	Danaus chrysippus_3D_040717	Danaus chrysippus	Danaus	Nymphalidae	07/04/17	Aposematic	NHM	NHM_LG.72.026_1	yes		0.0294230794940871	0.118545117492391	0.0568228369449966
144	32	Danaus chrysippus_3V_040717	Danaus chrysippus	Danaus	Nymphalidae	07/04/17	Aposematic	NHM	NHM_LG.72.026_1	yes		0.0368404831407469	0.120557844658909	0.0506391517148029
145	32	Danaus chrysippus_4D_040717	Danaus chrysippus	Danaus	Nymphalidae	07/04/17	Aposematic	NHM	NHM_LG.72.026_1	yes		0.0337135539579532	0.120459631881035	0.0750800397843862
146	32	Danaus chrysippus_4V_040717	Danaus chrysippus	Danaus	Nymphalidae	07/04/17	Aposematic	NHM	NHM_3.5.12.13	yes		0.0459991661121658	0.120036005001521	0.0643720258291984
147	32	Danaus chrysippus_5D_040717	Danaus chrysippus	Danaus	Nymphalidae	07/04/17	Aposematic	NHM	NHM_3.5.12.13	yes		0.0359090276042666	0.118448441963209	0.0558802436241021
148	32	Danaus chrysippus_5V_040717	Danaus chrysippus	Danaus	Nymphalidae	07/04/17	Aposematic	NHM	NHM_3.5.12.13	yes		0.0409633678889893	0.119223799663438	0.0523973042221576
149	32	Danaus chrysippus_6D_040717	Danaus chrysippus	Danaus	Nymphalidae	07/04/17	Aposematic	NHM	NHM_3.5.12.13	yes		0.0488043798750109	0.121802832909837	0.0692964340177816
150	32	Danaus chrysippus_6V_040717	Danaus chrysippus	Danaus	Nymphalidae	07/04/17	Aposematic	NHM	NHM_G.10.8.6	yes		0.0444095230998485	0.122099631283722	0.0695877530565637
151	33	Danaus eresimus_1D_050917	Danaus eresimus	Danaus	Nymphalidae	09/05/17	Aposematic	NHM	NHM_G.10.8.6	yes		0.0397226189476968	0.118163752497280	0.0596697959591240
152	33	Danaus eresimus_1V_050917	Danaus eresimus	Danaus	Nymphalidae	09/05/17	Aposematic	NHM	NHM_G.10.16.14	yes		0.0445496831375428	0.121673236629391	0.0492218389560845
153	33	Danaus eresimus_2D_050917	Danaus eresimus	Danaus	Nymphalidae	09/05/17	Aposematic	NHM	NHM_G.10.16.14	yes		0.0394422259776022	0.120725511597330	0.0448485753606109
154	33	Danaus eresimus_2V_050917	Danaus eresimus	Danaus	Nymphalidae	09/05/17	Aposematic	NHM	NHM_G.10.16.14	yes		0.0398432458330954	0.123093625960106	0.0363598452799032
155	34	Danaus plexippus_1D_070218	Danaus plexippus	Danaus	Nymphalidae	02/07/18	Aposematic	Manchester		yes		0.0456638633472506	0.118575753842836	0.0674916408711515
156	34	Danaus plexippus_1V_070218	Danaus plexippus	Danaus	Nymphalidae	02/07/18	Aposematic	Manchester		yes		0.0565132163653403	0.121932473475587	0.0584430639038812
157	34	Danaus plexippus_2D_070218	Danaus plexippus	Danaus	Nymphalidae	02/07/18	Aposematic	Manchester		yes		0.0482389509916004	0.118370662620334	0.0718446484179000
158	34	Danaus plexippus_2V_070218	Danaus plexippus	Danaus	Nymphalidae	02/07/18	Aposematic	Manchester		yes		0.0584917176535027	0.122661908587649	0.0585353707613100
159	35	Diaethria clymena_1D_060917	Diaethria clymena	Diaethria	Nymphalidae	09/06/17	Aposematic	NHM	NHM_G.19.4.11	yes		0.0441800571716775	0.119419013878138	0.0374507385764407
160	35	Diaethria clymena_1V_060917	Diaethria clymena	Diaethria	Nymphalidae	09/06/17	Aposematic	NHM	NHM_G.19.4.11	yes		0.0651683617157749	0.121471804041522	0.0776470012280569
161	35	Diaethria clymena_2D_060917	Diaethria clymena	Diaethria	Nymphalidae	09/06/17	Aposematic	NHM	NHM_G.19.4.11	yes		0.0472812442534297	0.118125809293253	0.0233415863630953
162	35	Diaethria clymena_2V_060917	Diaethria clymena	Diaethria	Nymphalidae	09/06/17	Aposematic	NHM	NHM_G.19.4.11	yes		0.0634168168223864	0.120174253616389	0.137452749351769
163	36	Dione juno_1D_060917	Dione juno	Dione	Nymphalidae	09/06/17	Aposematic	NHM	NHM_G.19.4.11	yes		0.0259525838254546	0.119406998677417	0.0583877056877814
164	36	Dione juno_1V_060917	Dione juno	Dione	Nymphalidae	09/06/17	Aposematic	NHM	NHM_G.19.4.11	yes		0.0400847200863098	0.122712121833814	0.0334809927228328
165	36	Dione juno_2D_060917	Dione juno	Dione	Nymphalidae	09/06/17	Aposematic	NHM	NHM_G.19.4.11	yes		0.0314007230355310	0.120025801128482	0.0695065200120726
166	36	Dione juno_2V_060917	Dione juno	Dione	Nymphalidae	09/06/17	Aposematic	NHM	NHM_G.19.4.11	yes		0.0505886363913858	0.121237294039343	0.0408292674665384
167	37	Dismorphia amphione_1D_070917	Dismorphia amphione	Dismorphia	Pieridae	09/07/17	Aposematic	NHM	NHM_G.19.4.11	yes		0.0375203429324537	0.120401374378782	0.0859403611966083
168	37	Dismorphia amphione_1V_070917	Dismorphia amphione	Dismorphia	Pieridae	09/07/17	Aposematic	NHM	NHM_G.16.20.9	yes		0.0213616395611758	0.116836431208377	0.0224776180276925
169	37	Dismorphia amphione_2D_070917	Dismorphia amphione	Dismorphia	Pieridae	09/07/17	Aposematic	NHM	NHM_G.16.20.9	yes		0.0437810895738901	0.123318148649665	0.0757401749837161
170	37	Dismorphia amphione_2V_070917	Dismorphia amphione	Dismorphia	Pieridae	09/07/17	Aposematic	NHM	NHM_G.16.20.9	yes		0.0210170081047971	0.117020133892785	0.0188088340586159
171	37	Dismorphia amphione_3D_070917	Dismorphia amphione	Dismorphia	Pieridae	09/07/17	Aposematic	NHM	NHM_G.16.20.9	yes		0.0413032803977330	0.122511466109611	0.0330847257299315
172	37	Dismorphia amphione_3V_070917	Dismorphia amphione	Dismorphia	Pieridae	09/07/17	Aposematic	NHM	NHM_G.16.20.9	yes		0.0201421929969705	0.116862744177850	0.0172798674938512
173	37	Dismorphia amphione_4D_070917	Dismorphia amphione	Dismorphia	Pieridae	09/07/17	Aposematic	NHM	NHM_G.16.20.9	yes		0.0435801878097186	0.127257024016547	0.0407125413154841
174	37	Dismorphia amphione_4V_070917	Dismorphia amphione	Dismorphia	Pieridae	09/07/17	Aposematic	NHM	NHM_G.16.20.9	yes		0.0271451583675243	0.119380026849002	0.0246063841644827
175	38	Eueides aliphera_1D_040717	Eueides aliphera	Eueides	Nymphalidae	07/04/17	Aposematic	NHM	NHM_G.16.15.14	yes		0.0357202824235170	0.122548269185605	0.0818459217001939
176	38	Eueides aliphera_1V_040717	Eueides aliphera	Eueides	Nymphalidae	07/04/17	Aposematic	NHM	NHM_G.16.16.3	yes		0.0284439252562410	0.129189138530091	0.0150121416574438
177	38	Eueides aliphera_2D_040717	Eueides aliphera	Eueides	Nymphalidae	07/04/17	Aposematic	NHM	NHM_G.16.16.3	yes		0.0210537122438601	0.119082766509325	0.0597530905527497
178	38	Eueides aliphera_2V_040717	Eueides aliphera	Eueides	Nymphalidae	07/04/17	Aposematic	NHM	NHM_G.16.16.3	yes		0.0253591947511381	0.131346435285986	0.0149380234571444
179	39	Eueides isabella_1D_060917	Eueides isabella	Eueides	Nymphalidae	09/06/17	Aposematic	NHM	NHM_G.16.16.3	yes		0.0458540885683601	0.125426974732274	0.0420458956474592
180	39	Eueides isabella_1V_060917	Eueides isabella	Eueides	Nymphalidae	09/06/17	Aposematic	NHM	NHM_G.16.16.7	yes		0.0367504639024945	0.122560237280236	0.0297169046336528
181	39	Eueides isabella_2D_060917	Eueides isabella	Eueides	Nymphalidae	09/06/17	Aposematic	NHM	NHM_G.16.16.7	yes		0.0465678609260948	0.125748684208680	0.0590011391824695
182	39	Eueides isabella_2V_060917	Eueides isabella	Eueides	Nymphalidae	09/06/17	Aposematic	NHM	NHM_G.16.16.7	yes		0.0319715407875689	0.119390085968462	0.0266266337208670
183	39	Eueides isabella_3D_060917	Eueides isabella	Eueides	Nymphalidae	09/06/17	Aposematic	NHM	NHM_G.16.16.7	yes		0.0464674460019798	0.124429172137466	0.0612994863383111
184	39	Eueides isabella_3V_060917	Eueides isabella	Eueides	Nymphalidae	09/06/17	Aposematic	NHM	NHM_G.16.16.11	yes		0.0360222590616354	0.117875832665400	0.0326158312432694
185	39	Eueides isabella_4D_060917	Eueides isabella	Eueides	Nymphalidae	09/06/17	Aposematic	NHM	NHM_G.16.16.11	yes		0.0418368846578119	0.123646877283726	0.0450261356375538
186	39	Eueides isabella_4V_060917	Eueides isabella	Eueides	Nymphalidae	09/06/17	Aposematic	NHM	NHM_G.16.16.11	yes		0.0318230366151545	0.117776274403828	0.0279390163818156
187	40	Eueides tales_1D_060917	Eueides tales	Eueides	Nymphalidae	09/06/17	Aposematic	NHM	NHM_G.16.16.11	yes		0.0402642558953510	0.120570795269952	0.0695397096387625
188	40	Eueides tales_1V_060917	Eueides tales	Eueides	Nymphalidae	09/06/17	Aposematic	NHM	NHM_G.16.16.11	yes		0.0443848414874405	0.123348888243863	0.0480739599994453
189	40	Eueides tales_2D_060917	Eueides tales	Eueides	Nymphalidae	09/06/17	Aposematic	NHM	NHM_G.16.16.11	yes		0.0394353874900658	0.119572497535278	0.0682702716632247
190	40	Eueides tales_2V_060917	Eueides tales	Eueides	Nymphalidae	09/06/17	Aposematic	NHM	NHM_G.16.16.11	yes		0.0409515287991704	0.119961594356286	0.0413632806275642
191	40	Eueides tales_3D_060917	Eueides tales	Eueides	Nymphalidae	09/06/17	Aposematic	NHM	NHM_G.16.16.11	yes		0.0524126593710675	0.122384325491143	0.0879068409458501
192	40	Eueides tales_3V_060917	Eueides tales	Eueides	Nymphalidae	09/06/17	Aposematic	NHM	NHM_G.16.19.11	yes		0.0501379555513567	0.123804184597897	0.0416438890697527
193	40	Eueides tales_4D_060917	Eueides tales	Eueides	Nymphalidae	09/06/17	Aposematic	NHM	NHM_G.16.19.11	yes		0.0448333563330626	0.120503165444748	0.0781544186323653
194	40	Eueides tales_4V_060917	Eueides tales	Eueides	Nymphalidae	09/06/17	Aposematic	NHM	NHM_G.16.19.11	yes		0.0442978489179717	0.122457614384824	0.0482392464381317
195	41	Euphydryas anicia_1D_040717	Euphydryas anicia	Euphydryas	Nymphalidae	07/04/17	Aposematic	NHM	NHM_G.17.2.4	yes		0.0535386592917224	0.118308038334606	0.0580863402810641
196	41	Euphydryas anicia_1V_040717	Euphydryas anicia	Euphydryas	Nymphalidae	07/04/17	Aposematic	NHM	NHM_G.17.3.8	yes		0.0419111599092109	0.115560635558903	0.0727790260125891
197	41	Euphydryas anicia_2D_040717	Euphydryas anicia	Euphydryas	Nymphalidae	07/04/17	Aposematic	NHM	NHM_G.17.3.8	yes		0.0527909674240646	0.119522440225999	0.0509530307036226
198	41	Euphydryas anicia_2V_040717	Euphydryas anicia	Euphydryas	Nymphalidae	07/04/17	Aposematic	NHM	NHM_G.17.3.8	yes		0.0424476417098898	0.115894177180335	0.0607858336911914
199	42	Euphydryas cynthia_1D_050717	Euphydryas cynthia	Euphydryas	Nymphalidae	07/05/17	Aposematic	NHM	NHM_G.22.7.11	yes		0.0481178364702910	0.119370478034947	0.0358625218888952
200	42	Euphydryas cynthia_1V_050717	Euphydryas cynthia	Euphydryas	Nymphalidae	07/05/17	Aposematic	NHM	NHM_G.25.1.14	yes		0.0383279533057194	0.115685533189667	0.0398132260767762
201	42	Euphydryas cynthia_2D_050717	Euphydryas cynthia	Euphydryas	Nymphalidae	07/05/17	Aposematic	NHM	NHM_G.25.1.14	yes		0.0503329181283384	0.119181874330528	0.0345934956009358
202	42	Euphydryas cynthia_2V_050717	Euphydryas cynthia	Euphydryas	Nymphalidae	07/05/17	Aposematic	NHM	NHM_G.25.1.14	yes		0.0354466164539935	0.115132367964364	0.0395995767328620
203	42	Euphydryas cynthia_3D_050717	Euphydryas cynthia	Euphydryas	Nymphalidae	07/05/17	Aposematic	NHM	NHM_G.25.1.14	yes		0.0271661360406059	0.115748554352267	0.0380654395514436
204	42	Euphydryas cynthia_3V_050717	Euphydryas cynthia	Euphydryas	Nymphalidae	07/05/17	Aposematic	NHM	NHM_G.22.9.9	yes		0.0283300345120536	0.115119478317438	0.0367012466013618
205	42	Euphydryas cynthia_4D_050717	Euphydryas cynthia	Euphydryas	Nymphalidae	07/05/17	Aposematic	NHM	NHM_G.22.9.9	yes		0.0355598517243548	0.116561370654364	0.0465821635253307
206	42	Euphydryas cynthia_4V_050717	Euphydryas cynthia	Euphydryas	Nymphalidae	07/05/17	Aposematic	NHM	NHM_G.22.9.9	yes		0.0331562905804427	0.115045608875814	0.0466239784696468
207	43	Euphydryas gillettii_1D_050717	Euphydryas gillettii	Euphydryas	Nymphalidae	07/05/17	Aposematic	NHM	NHM_G.22.9.9	yes		0.0535245116987857	0.117150585463349	0.0648611704752309
208	43	Euphydryas gillettii_1V_050717	Euphydryas gillettii	Euphydryas	Nymphalidae	07/05/17	Aposematic	NHM	NHM_G.37.11.12	yes		0.0414052156832475	0.115477496662316	0.0599093878590856
209	43	Euphydryas gillettii_2D_050717	Euphydryas gillettii	Euphydryas	Nymphalidae	07/05/17	Aposematic	NHM	NHM_G.37.11.12	yes		0.0478455730569229	0.117728026298993	0.0591931068348435
210	43	Euphydryas gillettii_2V_050717	Euphydryas gillettii	Euphydryas	Nymphalidae	07/05/17	Aposematic	NHM	NHM_G.37.11.12	yes		0.0439053214322556	0.115284348238551	0.0665370158333242
211	44	Euphydryas phaeton_1D_040717	Euphydryas phaeton	Euphydryas	Nymphalidae	07/04/17	Aposematic	NHM	NHM_G.37.11.12	yes		0.0560819158047754	0.117887669996458	0.0251018716424239
212	44	Euphydryas phaeton_1V_040717	Euphydryas phaeton	Euphydryas	Nymphalidae	07/04/17	Aposematic	NHM	NHM_G.25.1.11	yes		0.0637110447962228	0.117787370179347	0.0548448093669826
213	44	Euphydryas phaeton_2D_040717	Euphydryas phaeton	Euphydryas	Nymphalidae	07/04/17	Aposematic	NHM	NHM_G.25.1.11	yes		0.0567631555144249	0.119337231123069	0.0317060942499972
214	44	Euphydryas phaeton_2V_040717	Euphydryas phaeton	Euphydryas	Nymphalidae	07/04/17	Aposematic	NHM	NHM_G.25.1.11	yes		0.0624309460144277	0.117953350996911	0.0488381980127113
215	45	Heliconius burneyi_1D_060917	Heliconius burneyi	Heliconius	Nymphalidae	09/06/17	Aposematic	NHM	NHM_G.42.12.13	yes		0.0509176744743756	0.124194400092463	0.0847416376859295
216	45	Heliconius burneyi_1V_060917	Heliconius burneyi	Heliconius	Nymphalidae	09/06/17	Aposematic	NHM	NHM_G.42.12.10	yes		0.0414406857939739	0.126196027922185	0.0448462656722726
217	45	Heliconius burneyi_2D_060917	Heliconius burneyi	Heliconius	Nymphalidae	09/06/17	Aposematic	NHM	NHM_G.42.12.10	yes		0.0489190918664512	0.123421570327699	0.0862455344424958
218	45	Heliconius burneyi_2V_060917	Heliconius burneyi	Heliconius	Nymphalidae	09/06/17	Aposematic	NHM	NHM_G.42.12.10	yes		0.0427097329248714	0.124766535598448	0.0314208753918041
219	46	Heliconius charitonia_1D_170517	Heliconius charithonia	Heliconius	Nymphalidae	17/05/17	Aposematic	NHM	NHM_G.42.12.10	yes		0.0552479283694190	0.123695991301638	0.0356687202349525
220	46	Heliconius charitonia_1V_170517	Heliconius charithonia	Heliconius	Nymphalidae	17/05/17	Aposematic	NHM	NHM_G.42.13.10	yes		0.0445679220274444	0.122346907562267	0.0381206402510742
221	46	Heliconius charitonia_2D_170517	Heliconius charithonia	Heliconius	Nymphalidae	17/05/17	Aposematic	NHM	NHM_G.42.13.10	yes		0.0534594838553825	0.121858698928142	0.0390803407532431
222	46	Heliconius charitonia_2V_170517	Heliconius charithonia	Heliconius	Nymphalidae	17/05/17	Aposematic	NHM	NHM_G.42.13.10	yes		0.0433231644017990	0.121424106162113	0.0377726072052744
223	47	Heliconius cydno_1D_060917	Heliconius cydno	Heliconius	Nymphalidae	09/06/17	Aposematic	NHM	NHM_G.42.13.10	yes		0.0417657201954992	0.121571120570136	0.0320054115806763
224	47	Heliconius cydno_1V_060917	Heliconius cydno	Heliconius	Nymphalidae	09/06/17	Aposematic	NHM	NHM_G.43.2.8	yes		0.0371451980624321	0.122997152424283	0.0459732001179209
225	47	Heliconius cydno_2D_060917	Heliconius cydno	Heliconius	Nymphalidae	09/06/17	Aposematic	NHM	NHM_G.43.2.8	yes		0.0392389283196142	0.121945887614724	0.0329145687055964
226	47	Heliconius cydno_2V_060917	Heliconius cydno	Heliconius	Nymphalidae	09/06/17	Aposematic	NHM	NHM_G.43.2.8	yes		0.0344787970417524	0.122247353788432	0.0425429480304092
227	47	Heliconius cydno_3D_060917	Heliconius cydno	Heliconius	Nymphalidae	09/06/17	Aposematic	NHM	NHM_G.43.2.8	yes		0.0378968365334403	0.118268463805585	0.0280393870942519
228	47	Heliconius cydno_3V_060917	Heliconius cydno	Heliconius	Nymphalidae	09/06/17	Aposematic	NHM	NHM_G.43.13.6	yes		0.0315550661013272	0.118917532111576	0.0313971842498225
229	47	Heliconius cydno_4D_060917	Heliconius cydno	Heliconius	Nymphalidae	09/06/17	Aposematic	NHM	NHM_G.43.13.6	yes		0.0408783515243248	0.122008335815698	0.0282941000016119
230	47	Heliconius cydno_4V_060917	Heliconius cydno	Heliconius	Nymphalidae	09/06/17	Aposematic	NHM	NHM_G.43.13.6	yes		0.0343147681642607	0.121567730337366	0.0328234994445296
231	47	Heliconius cydno_5D_060917	Heliconius cydno	Heliconius	Nymphalidae	09/06/17	Aposematic	NHM	NHM_G.43.13.6	yes		0.0433593919974169	0.121189477477250	0.0288594225568511
232	47	Heliconius cydno_5V_060917	Heliconius cydno	Heliconius	Nymphalidae	09/06/17	Aposematic	NHM	NHM_G.43.9.2	yes		0.0301303637791659	0.119459177151197	0.0436464988478728
233	47	Heliconius cydno_6D_060917	Heliconius cydno	Heliconius	Nymphalidae	09/06/17	Aposematic	NHM	NHM_G.43.9.2	yes		0.0448836849644344	0.120218271628579	0.0303874801226129
234	47	Heliconius cydno_6V_060917	Heliconius cydno	Heliconius	Nymphalidae	09/06/17	Aposematic	NHM	NHM_G.43.9.2	yes		0.0307462852778790	0.119679143368953	0.0469908319423522
235	47	Heliconius cydno_7D_060917	Heliconius cydno	Heliconius	Nymphalidae	09/06/17	Aposematic	NHM	NHM_G.43.9.2	yes		0.0433866403541924	0.121597820628211	0.0288211199130292
236	47	Heliconius cydno_7V_060917	Heliconius cydno	Heliconius	Nymphalidae	09/06/17	Aposematic	NHM	NHM_G.43.8.6	yes		0.0309242167652093	0.119935613906448	0.0414454145717256
237	47	Heliconius cydno_8D_060917	Heliconius cydno	Heliconius	Nymphalidae	09/06/17	Aposematic	NHM	NHM_G.43.8.6	yes		0.0410693815638652	0.120527345595524	0.0315224230050601
238	47	Heliconius cydno_8V_060917	Heliconius cydno	Heliconius	Nymphalidae	09/06/17	Aposematic	NHM	NHM_G.43.8.6	yes		0.0295793138071462	0.122161178678234	0.0450792227014899
239	48	Heliconius eleuchia_1D_060917	Heliconius eleuchia	Heliconius	Nymphalidae	09/06/17	Aposematic	NHM	NHM_G.43.8.6	yes		0.0354618857112086	0.121064058473418	0.0276727279273651
240	48	Heliconius eleuchia_1V_060917	Heliconius eleuchia	Heliconius	Nymphalidae	09/06/17	Aposematic	NHM	NHM_G.43.5.7	yes		0.0353263649932106	0.121424204544917	0.0400419813534962
241	48	Heliconius eleuchia_2D_060917	Heliconius eleuchia	Heliconius	Nymphalidae	09/06/17	Aposematic	NHM	NHM_G.43.5.7	yes		0.0389668757595500	0.123203013359248	0.0234394144616996
242	48	Heliconius eleuchia_2V_060917	Heliconius eleuchia	Heliconius	Nymphalidae	09/06/17	Aposematic	NHM	NHM_G.43.5.7	yes		0.0374520797480557	0.124095494697284	0.0332815525090968
243	49	Heliconius erato_1D_080218	Heliconius erato hydara	Heliconius	Nymphalidae	02/08/18	Aposematic	Manchester		yes		0.0331199075599289	0.120194724477806	0.105714933703521
244	49	Heliconius erato_1V_080218	Heliconius erato hydara	Heliconius	Nymphalidae	02/08/18	Aposematic	Manchester		yes		0.0269250637866412	0.119507261463492	0.0346812446150366
245	49	Heliconius erato_2D_080218	Heliconius erato hydara	Heliconius	Nymphalidae	02/08/18	Aposematic	Manchester		yes		0.0413390941225001	0.120733533377550	0.101030389911543
246	49	Heliconius erato_2V_080218	Heliconius erato hydara	Heliconius	Nymphalidae	02/08/18	Aposematic	Manchester		yes		0.0394688955624971	0.120195629018764	0.0408645558213471
247	49	Heliconius erato_3D_080218	Heliconius erato hydara	Heliconius	Nymphalidae	02/08/18	Aposematic	Manchester		yes		0.0606198082111778	0.125157777853294	0.107708465850358
248	49	Heliconius erato_3V_080218	Heliconius erato hydara	Heliconius	Nymphalidae	02/08/18	Aposematic	Manchester		yes		0.0591619477720363	0.123305262216227	0.0696522817668274
249	50	Heliconius ethilla_1D_050917	Heliconius ethilla	Heliconius	Nymphalidae	09/05/17	Aposematic	NHM	NHM_G.43.5.7	yes		0.0429795077885783	0.121938305652521	0.0580387620395187
250	50	Heliconius ethilla_1V_050917	Heliconius ethilla	Heliconius	Nymphalidae	09/05/17	Aposematic	NHM	NHM_G.43.4.9	yes		0.0423620679441275	0.120139747575551	0.0382598493732657
251	50	Heliconius ethilla_2D_050917	Heliconius ethilla	Heliconius	Nymphalidae	09/05/17	Aposematic	NHM	NHM_G.43.4.9	yes		0.0419617803964512	0.121298493596048	0.0666860788818152
252	50	Heliconius ethilla_2V_050917	Heliconius ethilla	Heliconius	Nymphalidae	09/05/17	Aposematic	NHM	NHM_G.43.4.9	yes		0.0453090208300546	0.122164759291425	0.0459212131877751
253	50	Heliconius ethilla_3D_050917	Heliconius ethilla	Heliconius	Nymphalidae	09/05/17	Aposematic	NHM	NHM_G.43.4.9	yes		0.0377609325683328	0.119571201616239	0.0501724465132721
254	50	Heliconius ethilla_3V_050917	Heliconius ethilla	Heliconius	Nymphalidae	09/05/17	Aposematic	NHM	NHM_G.43.2.1	yes		0.0358208758664204	0.118769293848803	0.0298437168427472
255	50	Heliconius ethilla_4D_050917	Heliconius ethilla	Heliconius	Nymphalidae	09/05/17	Aposematic	NHM	NHM_G.43.2.1	yes		0.0418736275826652	0.121183270405792	0.0760974589949124
256	50	Heliconius ethilla_4V_050917	Heliconius ethilla	Heliconius	Nymphalidae	09/05/17	Aposematic	NHM	NHM_G.43.2.1	yes		0.0434736954077686	0.121905063501594	0.0454262212273032
257	51	Heliconius himera_1D_060917	Heliconius himera	Heliconius	Nymphalidae	09/06/17	Aposematic	NHM	NHM_G.42.11.10	yes		0.0311180676801225	0.120845615211159	0.0837980300563541
258	51	Heliconius himera_1V_060917	Heliconius himera	Heliconius	Nymphalidae	09/06/17	Aposematic	NHM	NHM_G.42.11.10	yes		0.0293189324674521	0.120265606714793	0.0319966701157558
259	51	Heliconius himera_2D_060917	Heliconius himera	Heliconius	Nymphalidae	09/06/17	Aposematic	NHM	NHM_G.42.11.10	yes		0.0322783667874587	0.122687615733316	0.0859784854996370
260	51	Heliconius himera_2V_060917	Heliconius himera	Heliconius	Nymphalidae	09/06/17	Aposematic	NHM	NHM_G.42.11.10	yes		0.0279345181697174	0.119519593483331	0.0280438361149598
261	52	Heliconius melpomene_1D_050917	Heliconius melpomene	Heliconius	Nymphalidae	09/05/17	Aposematic	NHM	NHM_G.58.4.3	yes		0.0395048769778976	0.118859727033641	0.0917303994892644
262	52	Heliconius melpomene_1V_050917	Heliconius melpomene	Heliconius	Nymphalidae	09/05/17	Aposematic	NHM	NHM_G.58.4.3	yes		0.0305435519107682	0.117770635871708	0.0389614622128335
263	52	Heliconius melpomene_2D_050917	Heliconius melpomene	Heliconius	Nymphalidae	09/05/17	Aposematic	NHM	NHM_G.58.4.3	yes		0.0374662971500027	0.119968011612255	0.0818632564143017
264	52	Heliconius melpomene_2V_050917	Heliconius melpomene	Heliconius	Nymphalidae	09/05/17	Aposematic	NHM	NHM_G.58.2.2	yes		0.0316539110654251	0.118618451648922	0.0445043600281564
265	52	Heliconius melpomene_3D_050917	Heliconius melpomene	Heliconius	Nymphalidae	09/05/17	Aposematic	NHM	NHM_G.58.2.2	yes		0.0387344736985210	0.120782488898425	0.0799599589734000
266	52	Heliconius melpomene_3V_050917	Heliconius melpomene	Heliconius	Nymphalidae	09/05/17	Aposematic	NHM	NHM_G.58.2.2	yes		0.0329472446127424	0.120696496836086	0.0341714971670381
267	52	Heliconius melpomene_4D_050917	Heliconius melpomene	Heliconius	Nymphalidae	09/05/17	Aposematic	NHM	NHM_G.58.2.2	yes		0.0399406590696419	0.120179012649805	0.0868934209964290
268	52	Heliconius melpomene_4V_050917	Heliconius melpomene	Heliconius	Nymphalidae	09/05/17	Aposematic	NHM	NHM_G.58.2.2	yes		0.0328296728497352	0.120589955186193	0.0397748216343052
269	53	Heliconius numata_1D_050917	Heliconius numata	Heliconius	Nymphalidae	09/05/17	Aposematic	NHM	NHM_G.42.11.10	yes		0.0367348022424042	0.120468784550760	0.0754178488570951
270	53	Heliconius numata_1V_050917	Heliconius numata	Heliconius	Nymphalidae	09/05/17	Aposematic	NHM	NHM_G.42.9.15	yes		0.0322676071494112	0.120641434723347	0.0528387714381381
271	53	Heliconius numata_2D_050917	Heliconius numata	Heliconius	Nymphalidae	09/05/17	Aposematic	NHM	NHM_G.42.9.15	yes		0.0335890523515798	0.119977711907490	0.0684155125169553
272	53	Heliconius numata_2V_050917	Heliconius numata	Heliconius	Nymphalidae	09/05/17	Aposematic	NHM	NHM_G.42.9.15	yes		0.0330959927754762	0.120251835507072	0.0461871675219856
273	53	Heliconius numata_3D_050917	Heliconius numata	Heliconius	Nymphalidae	09/05/17	Aposematic	NHM	NHM_G.42.9.15	yes		0.0277021131152910	0.116978910469587	0.0724897132101398
274	53	Heliconius numata_3V_050917	Heliconius numata	Heliconius	Nymphalidae	09/05/17	Aposematic	NHM	NHM_G.42.9.15	yes		0.0248910830005671	0.116409572054810	0.0485220820927203
275	53	Heliconius numata_4D_050917	Heliconius numata	Heliconius	Nymphalidae	09/05/17	Aposematic	NHM	NHM_G.42.9.15	yes		0.0337932210652495	0.119831201539104	0.0663576844477365
276	53	Heliconius numata_4V_050917	Heliconius numata	Heliconius	Nymphalidae	09/05/17	Aposematic	NHM	NHM_G.42.9.15	yes		0.0308160614186680	0.119112497472062	0.0406133289037920
277	53	Heliconius numata_5D_050917	Heliconius numata	Heliconius	Nymphalidae	09/05/17	Aposematic	NHM	NHM_G.42.9.15	yes		0.0351594781975038	0.120003839560681	0.0582653049432345
278	53	Heliconius numata_5V_050917	Heliconius numata	Heliconius	Nymphalidae	09/05/17	Aposematic	NHM	NHM_G.42.9.15	yes		0.0289626905440944	0.119810486261347	0.0370588331509435
279	53	Heliconius numata_6D_050917	Heliconius numata	Heliconius	Nymphalidae	09/05/17	Aposematic	NHM	NHM_G.42.9.15	yes		0.0354403456478590	0.117696970666942	0.0478740139819263
280	53	Heliconius numata_6V_050917	Heliconius numata	Heliconius	Nymphalidae	09/05/17	Aposematic	NHM	NHM_G.42.10.1	yes		0.0310373908059498	0.117807008064999	0.0349684918215130
281	53	Heliconius numata_7D_050917	Heliconius numata	Heliconius	Nymphalidae	09/05/17	Aposematic	NHM	NHM_G.42.10.1	yes		0.0337312514252380	0.120038949522231	0.0696748256674958
282	53	Heliconius numata_7V_050917	Heliconius numata	Heliconius	Nymphalidae	09/05/17	Aposematic	NHM	NHM_G.42.10.1	yes		0.0338374676983287	0.120274383570754	0.0593039490109472
283	53	Heliconius numata_8D_050917	Heliconius numata	Heliconius	Nymphalidae	09/05/17	Aposematic	NHM	NHM_G.42.10.1	yes		0.0366803924025743	0.117154821579804	0.0715116615961893
284	53	Heliconius numata_8V_050917	Heliconius numata	Heliconius	Nymphalidae	09/05/17	Aposematic	NHM	NHM_G.57.12.10	yes		0.0329051827531374	0.118342712572942	0.0495743747186246
285	53	Heliconius numata_9D_050917	Heliconius numata	Heliconius	Nymphalidae	09/05/17	Aposematic	NHM	NHM_G.57.12.10	yes		0.0384827687680058	0.121142878728767	0.0647536648114360
286	53	Heliconius numata_9V_050917	Heliconius numata	Heliconius	Nymphalidae	09/05/17	Aposematic	NHM	NHM_G.57.12.10	yes		0.0345463968892724	0.119790803804519	0.0476271592947713
287	53	Heliconius numata_10D_050917	Heliconius numata	Heliconius	Nymphalidae	09/05/17	Aposematic	NHM	NHM_G.57.12.10	yes		0.0396444260017833	0.120872165240090	0.0632746029085972
288	53	Heliconius numata_10V_050917	Heliconius numata	Heliconius	Nymphalidae	09/05/17	Aposematic	NHM	NHM_G.57.12.10	yes		0.0339661995623602	0.119252804915894	0.0430350907128510
289	54	Heliconius sapho_1D_060917	Heliconius sapho	Heliconius	Nymphalidae	09/06/17	Aposematic	NHM	NHM_G.57.12.10	yes		0.0334831295655873	0.120449792101300	0.0373915616626503
290	54	Heliconius sapho_1V_060917	Heliconius sapho	Heliconius	Nymphalidae	09/06/17	Aposematic	NHM	NHM_G.57.12.10	yes		0.0306542455998383	0.119463402460792	0.0471632334301167
291	54	Heliconius sapho_2D_060917	Heliconius sapho	Heliconius	Nymphalidae	09/06/17	Aposematic	NHM	NHM_G.57.12.10	yes		0.0355883028511309	0.123689118864509	0.0371390518528676
292	54	Heliconius sapho_2V_060917	Heliconius sapho	Heliconius	Nymphalidae	09/06/17	Aposematic	NHM	NHM_G.57.9.3	yes		0.0332867135744935	0.120313114418879	0.0446790564252351
293	54	Heliconius sapho_3D_060917	Heliconius sapho	Heliconius	Nymphalidae	09/06/17	Aposematic	NHM	NHM_G.57.9.3	yes		0.0354281656364440	0.123222331137343	0.0290979519173487
294	54	Heliconius sapho_3V_060917	Heliconius sapho	Heliconius	Nymphalidae	09/06/17	Aposematic	NHM	NHM_G.57.9.3	yes		0.0365216753415834	0.120432895186177	0.0544291404464356
295	54	Heliconius sapho_4D_060917	Heliconius sapho	Heliconius	Nymphalidae	09/06/17	Aposematic	NHM	NHM_G.57.9.3	yes		0.0345670722693957	0.121202669646062	0.0294294976868729
296	54	Heliconius sapho_4V_060917	Heliconius sapho	Heliconius	Nymphalidae	09/06/17	Aposematic	NHM	NHM_G.57.9.3	yes		0.0322988910967255	0.120641346719119	0.0525889862478606
297	55	Heliconius sara_1D_060917	Heliconius sara	Heliconius	Nymphalidae	09/06/17	Aposematic	NHM	NHM_G.57.9.3	yes		0.0377669137631302	0.119798006218423	0.0430304166198292
298	55	Heliconius sara_1V_060917	Heliconius sara	Heliconius	Nymphalidae	09/06/17	Aposematic	NHM	NHM_G.57.9.3	yes		0.0344016890417855	0.119114678801167	0.0282815643840250
299	55	Heliconius sara_2D_060917	Heliconius sara	Heliconius	Nymphalidae	09/06/17	Aposematic	NHM	NHM_G.57.9.3	yes		0.0397582201818252	0.118338290791196	0.0330093906923667
300	55	Heliconius sara_2V_060917	Heliconius sara	Heliconius	Nymphalidae	09/06/17	Aposematic	NHM	NHM_G.58.4.1	yes		0.0366917858669269	0.123293016664355	0.0297380482874149
301	56	Heliconius wallacei_1D_060917	Heliconius wallacei	Heliconius	Nymphalidae	09/06/17	Aposematic	NHM	NHM_G.58.4.1	yes		0.0426766393980536	0.120953948777278	0.0376036793034349
302	56	Heliconius wallacei_1V_060917	Heliconius wallacei	Heliconius	Nymphalidae	09/06/17	Aposematic	NHM	NHM_G.58.4.1	yes		0.0423105252492483	0.127258294803968	0.0353206836258127
303	56	Heliconius wallacei_2D_060917	Heliconius wallacei	Heliconius	Nymphalidae	09/06/17	Aposematic	NHM	NHM_G.58.4.1	yes		0.0381505760963962	0.119252369630473	0.0370309043362238
304	56	Heliconius wallacei_2V_060917	Heliconius wallacei	Heliconius	Nymphalidae	09/06/17	Aposematic	NHM	NHM_G.58.4.1	yes		0.0361066002956447	0.123944023090504	0.0336732395797157
305	56	Heliconius wallacei_3D_060917	Heliconius wallacei	Heliconius	Nymphalidae	09/06/17	Aposematic	NHM	NHM_G.58.4.1	yes		0.0416202500433719	0.121624982589305	0.0298160871480146
306	56	Heliconius wallacei_3V_060917	Heliconius wallacei	Heliconius	Nymphalidae	09/06/17	Aposematic	NHM	NHM_G.58.4.1	yes		0.0389947212328958	0.129682069582379	0.0337061501583303
307	56	Heliconius wallacei_4D_060917	Heliconius wallacei	Heliconius	Nymphalidae	09/06/17	Aposematic	NHM	NHM_G.58.4.1	yes		0.0424750556350920	0.121671691084137	0.0281224391323564
308	56	Heliconius wallacei_4V_060917	Heliconius wallacei	Heliconius	Nymphalidae	09/06/17	Aposematic	NHM	NHM_G.58.4.6	yes		0.0371382751456080	0.127049199462496	0.0326806929954095
309	57	Heliconius xanthocles_1D_060917	Heliconius xanthocles	Heliconius	Nymphalidae	09/06/17	Aposematic	NHM	NHM_G.58.4.6	yes		0.0530694735857907	0.124562734965421	0.0991356601044240
310	57	Heliconius xanthocles_1V_060917	Heliconius xanthocles	Heliconius	Nymphalidae	09/06/17	Aposematic	NHM	NHM_G.58.4.6	yes		0.0543309168922102	0.124900294058450	0.0591909393032130
311	57	Heliconius xanthocles_2D_060917	Heliconius xanthocles	Heliconius	Nymphalidae	09/06/17	Aposematic	NHM	NHM_G.58.4.6	yes		0.0548074758446777	0.122699040113479	0.101504204702021
312	57	Heliconius xanthocles_2V_060917	Heliconius xanthocles	Heliconius	Nymphalidae	09/06/17	Aposematic	NHM	NHM_G.58.4.3	yes		0.0615716836719875	0.125311078770707	0.0607234905006248
313	58	Hypoprepia fucosa_1D_040917	Hypoprepia fucosa	Hypoprepia	Erebidae	09/04/17	Aposematic	NHM	NHM_G.58.2.14	yes		0.0227662224342567	0.116172236560434	0.0126564469097044
314	58	Hypoprepia fucosa_1V_040917	Hypoprepia fucosa	Hypoprepia	Erebidae	09/04/17	Aposematic	NHM	NHM_G.58.2.14	yes		0.0267467682715727	0.117166206854948	0.0194601171293305
315	59	Hypothyris daphnis_1D_040917	Hypothyris daphnis	Hypothyris	Nymphalidae	09/04/17	Aposematic	NHM	NHM_G.58.2.14	yes		0.0364259625365656	0.118879056658750	0.0634679044199296
316	59	Hypothyris daphnis_1V_040917	Hypothyris daphnis	Hypothyris	Nymphalidae	09/04/17	Aposematic	NHM	NHM_G.57.10.10	yes		0.0383730385745354	0.117595314359546	0.0330297715344624
317	59	Hypothyris daphnis_2D_040917	Hypothyris daphnis	Hypothyris	Nymphalidae	09/04/17	Aposematic	NHM	NHM_G.57.10.10	yes		0.0455611671660248	0.119813412314907	0.0727866385210997
318	59	Hypothyris daphnis_2V_040917	Hypothyris daphnis	Hypothyris	Nymphalidae	09/04/17	Aposematic	NHM	NHM_G.57.10.10	yes		0.0438665302902507	0.120013309681463	0.0433959662954535
319	60	Hypothyris ninonia_1D_040917	Hypothyris ninonia	Hypothyris	Nymphalidae	09/04/17	Aposematic	NHM	NHM_G.57.10.10	yes		0.0439944167074963	0.119720103414630	0.0646786977464976
320	60	Hypothyris ninonia_1V_040917	Hypothyris ninonia	Hypothyris	Nymphalidae	09/04/17	Aposematic	NHM	NHM_G.51.3.2	yes		0.0419915686031487	0.117986279003876	0.0370780091808561
321	60	Hypothyris ninonia_2D_040917	Hypothyris ninonia	Hypothyris	Nymphalidae	09/04/17	Aposematic	NHM	NHM_G.51.3.2	yes		0.0421142499324837	0.120703901025191	0.0668148341023229
322	60	Hypothyris ninonia_2V_040917	Hypothyris ninonia	Hypothyris	Nymphalidae	09/04/17	Aposematic	NHM	NHM_G.51.3.2	yes		0.0406354122586484	0.118662830120237	0.0371893287319502
323	61	Limenitis archippus_1D_070917	Limenitis archippus	Limenitis	Nymphalidae	09/07/17	Aposematic	NHM	NHM_3.115.13.3022	yes		0.0540201917254812	0.121421197404337	0.0671901418451763
324	61	Limenitis archippus_1V_070917	Limenitis archippus	Limenitis	Nymphalidae	09/07/17	Aposematic	NHM	NHM_3.115.13.3022	yes		0.0585542686699254	0.121568736946537	0.0537501408617557
325	61	Limenitis archippus_2D_070917	Limenitis archippus	Limenitis	Nymphalidae	09/07/17	Aposematic	NHM	NHM_3.108.11.1035	yes		0.0558355474285409	0.123882184051244	0.0439121940930320
326	61	Limenitis archippus_2V_070917	Limenitis archippus	Limenitis	Nymphalidae	09/07/17	Aposematic	NHM	NHM_3.108.11.1035	yes		0.0588014423989834	0.123769559115826	0.0442787723233494
327	62	Mapeta xanthomelas_1D_070218	Mapeta xanthomelas	Mapeta	Pyralidae	02/07/18	Aposematic	AMNH		yes		0.0358266862836864	0.117199852609648	0.0483687100706585
328	62	Mapeta xanthomelas_1V_070218	Mapeta xanthomelas	Mapeta	Pyralidae	02/07/18	Aposematic	AMNH		yes		0.0339629663926386	0.121058713291584	0.0492378266330638
329	63	Mechanitis mazaeus_1D_040917	Mechanitis mazaeus	Mechanitis	Nymphalidae	09/04/17	Aposematic	NHM	NHM_G.3.11.11	yes		0.0353700206920610	0.119951931905440	0.0644644416196904
330	63	Mechanitis mazaeus_1V_040917	Mechanitis mazaeus	Mechanitis	Nymphalidae	09/04/17	Aposematic	NHM	NHM_G.3.11.11	yes		0.0347239102687292	0.117173301682455	0.0540675014026686
331	63	Mechanitis mazaeus_2D_040917	Mechanitis mazaeus	Mechanitis	Nymphalidae	09/04/17	Aposematic	NHM	NHM_G.3.11.12	yes		0.0328749759410505	0.120170848692859	0.0614158535775394
332	63	Mechanitis mazaeus_2V_040917	Mechanitis mazaeus	Mechanitis	Nymphalidae	09/04/17	Aposematic	NHM	NHM_G.3.11.12	yes		0.0330413481004793	0.118987482195236	0.0526705148215516
333	64	Melanargia_galathea_1D_070218	Melanargia galathea	Melanargia	Nymphalidae	02/07/18	Aposematic	Manchester		yes		0.0524094506557886	0.117786315375932	0.0301604286734138
334	64	Melanargia_galathea_1V_070218	Melanargia galathea	Melanargia	Nymphalidae	02/07/18	Aposematic	Manchester		yes		0.0408287236365564	0.115832171143090	0.0238091023839998
335	64	Melanargia_galathea_2D_070218	Melanargia galathea	Melanargia	Nymphalidae	02/07/18	Aposematic	Manchester		yes		0.0448166472667887	0.117585396992493	0.0354648764661530
336	64	Melanargia_galathea_2V_070218	Melanargia galathea	Melanargia	Nymphalidae	02/07/18	Aposematic	Manchester		yes		0.0313908248391904	0.117011443311812	0.0208547704121216
337	65	Melinaea mneme_1D_040917	Melinaea mneme	Melinaea	Nymphalidae	09/04/17	Aposematic	NHM	NHM_G.3.11.12	yes		0.0390288309654196	0.123025976996505	0.0694325860930700
338	65	Melinaea mneme_1V_040917	Melinaea mneme	Melinaea	Nymphalidae	09/04/17	Aposematic	NHM	NHM_G.3.11.12	yes		0.0504706793978204	0.122013949235320	0.0629250659619452
339	65	Melinaea mneme_2D_040917	Melinaea mneme	Melinaea	Nymphalidae	09/04/17	Aposematic	NHM	NHM_G.9.20.1	yes		0.0353066964304050	0.120992496775911	0.0680813686542865
340	65	Melinaea mneme_2V_040917	Melinaea mneme	Melinaea	Nymphalidae	09/04/17	Aposematic	NHM	NHM_G.9.20.1	yes		0.0418521868521118	0.121502522151245	0.0529884210596974
341	66	Melitaea athalia_1D_030717	Melitaea athalia	Melitaea	Nymphalidae	07/03/17	Aposematic	NHM	NHM_G.9.20.1	yes		0.0496043246724555	0.117970213701705	0.0429593623282772
342	66	Melitaea athalia_1V_030717	Melitaea athalia	Melitaea	Nymphalidae	07/03/17	Aposematic	NHM	NHM_G.9.20.1	yes		0.0423290101886381	0.114977293332050	0.0567445891135167
343	66	Melitaea athalia_2D_030717	Melitaea athalia	Melitaea	Nymphalidae	07/03/17	Aposematic	NHM	NHM_G.3.8.13	yes		0.0473215215985319	0.118306983519721	0.0316983626194245
344	66	Melitaea athalia_2V_030717	Melitaea athalia	Melitaea	Nymphalidae	07/03/17	Aposematic	NHM	NHM_G.3.8.13	yes		0.0395340699860941	0.114338721966476	0.0504032165503720
345	67	Melitaea aurelia_1D_050717	Melitaea aurelia	Melitaea	Nymphalidae	07/05/17	Aposematic	NHM	NHM_G.3.8.13	yes		0.0429613848241253	0.118321279222287	0.0480893555237242
346	67	Melitaea aurelia_1V_050717	Melitaea aurelia	Melitaea	Nymphalidae	07/05/17	Aposematic	NHM	NHM_G.3.8.13	yes		0.0421711575870116	0.115585762246377	0.0419614458181889
347	67	Melitaea aurelia_2D_050717	Melitaea aurelia	Melitaea	Nymphalidae	07/05/17	Aposematic	NHM	NHM_G.3.8.13	yes		0.0535608909196542	0.120309209442436	0.0413233764319162
348	67	Melitaea aurelia_2V_050717	Melitaea aurelia	Melitaea	Nymphalidae	07/05/17	Aposematic	NHM	NHM_G.3.8.13	yes		0.0401521306763777	0.114440542460203	0.0440241662589227
349	68	Melitaea didyma_1D_040717	Melitaea didyma	Melitaea	Nymphalidae	07/04/17	Aposematic	NHM	NHM_G.3.8.13	yes		0.0442031813691550	0.114505722945214	0.0448934903281156
350	68	Melitaea didyma_1V_040717	Melitaea didyma	Melitaea	Nymphalidae	07/04/17	Aposematic	NHM	NHM_G.3.8.13	yes		0.0369457744371648	0.115024651428098	0.0517669204859993
351	68	Melitaea didyma_2D_040717	Melitaea didyma	Melitaea	Nymphalidae	07/04/17	Aposematic	NHM	NHM_G.3.4.3	yes		0.0408985522767647	0.113995694540357	0.0478870543757432
352	68	Melitaea didyma_2V_040717	Melitaea didyma	Melitaea	Nymphalidae	07/04/17	Aposematic	NHM	NHM_G.3.4.3	yes		0.0334409595017296	0.115865838661450	0.0449544990292345
353	68	Melitaea didyma_3D_040717	Melitaea didyma	Melitaea	Nymphalidae	07/04/17	Aposematic	NHM	NHM_G.3.4.3	yes		0.0353463238193937	0.116849910638262	0.0715404687219243
354	68	Melitaea didyma_3V_040717	Melitaea didyma	Melitaea	Nymphalidae	07/04/17	Aposematic	NHM	NHM_G.3.4.3	yes		0.0383205481926583	0.115955173119282	0.0623211165381677
355	68	Melitaea didyma_4D_040717	Melitaea didyma	Melitaea	Nymphalidae	07/04/17	Aposematic	NHM	NHM_G.3.4.3	yes		0.0426593634212513	0.114930740653454	0.0888061391017462
356	68	Melitaea didyma_4V_040717	Melitaea didyma	Melitaea	Nymphalidae	07/04/17	Aposematic	NHM	NHM_G.3.4.3	yes		0.0448052450027142	0.115550844899017	0.0687446479066625
357	68	Melitaea didyma_5D_040717	Melitaea didyma	Melitaea	Nymphalidae	07/04/17	Aposematic	NHM	NHM_G.3.4.3	yes		0.0432797879473931	0.115554367913744	0.0265813104349840
358	68	Melitaea didyma_5V_040717	Melitaea didyma	Melitaea	Nymphalidae	07/04/17	Aposematic	NHM	NHM_G.3.4.3	yes		0.0332839907156548	0.115791189901745	0.0335304060758002
359	68	Melitaea didyma_6D_040717	Melitaea didyma	Melitaea	Nymphalidae	07/04/17	Aposematic	NHM	NHM_G.1.1.11	yes		0.0436772830332939	0.115529039598354	0.0341935309870125
360	68	Melitaea didyma_6V_040717	Melitaea didyma	Melitaea	Nymphalidae	07/04/17	Aposematic	NHM	NHM_G.1.1.11	yes		0.0409139729073461	0.115330131842558	0.0409945859107517
361	69	Nica flavilla_1D_060917	Nica flavilla	Nica	Nymphalidae	09/06/17	Aposematic	NHM	NHM_G.13.21.12	yes		0.0248075073767586	0.115834958048391	0.0650636154848350
362	69	Nica flavilla_1V_060917	Nica flavilla	Nica	Nymphalidae	09/06/17	Aposematic	NHM	NHM_G.13.21.12	yes		0.0253613418342194	0.116207638940880	0.0294733906370612
363	69	Nica flavilla_2D_060917	Nica flavilla	Nica	Nymphalidae	09/06/17	Aposematic	NHM	NHM_G.13.21.12	yes		0.0212822831876183	0.114318135542870	0.0574306639311476
364	69	Nica flavilla_2V_060917	Nica flavilla	Nica	Nymphalidae	09/06/17	Aposematic	NHM	NHM_G.13.21.12	yes		0.0209890766186360	0.116489009270251	0.0270935021346363
365	70	Ornithoptera_goliath_1D_060318	Ornithoptera goliath	Ornithoptera	Papilionidae	03/06/18	Aposematic	Manchester		yes		0.0362125582382874	0.116810360442134	0.0438587510683467
366	70	Ornithoptera_goliath_1V_060318	Ornithoptera goliath	Ornithoptera	Papilionidae	03/06/18	Aposematic	Manchester		yes		0.0428796934909675	0.118907468881590	0.0309550988177664
367	71	Pachliopta aristolochiae_1D_050717	Pachliopta aristolochiae	Pachliopta	Papilionidae	07/05/17	Aposematic	NHM	NHM_G.13.20.9	yes		0.0402655955863990	0.119597249752977	0.0245232864304011
368	71	Pachliopta aristolochiae_1V_050717	Pachliopta aristolochiae	Pachliopta	Papilionidae	07/05/17	Aposematic	NHM	NHM_G.13.20.9	yes		0.0481609472059361	0.122423715926928	0.0509144737307007
369	71	Pachliopta aristolochiae_2D_050717	Pachliopta aristolochiae	Pachliopta	Papilionidae	07/05/17	Aposematic	NHM	NHM_G.13.20.9	yes		0.0321332815052512	0.119577771644869	0.0196173465401028
370	71	Pachliopta aristolochiae_2V_050717	Pachliopta aristolochiae	Pachliopta	Papilionidae	07/05/17	Aposematic	NHM	NHM_G.13.20.9	yes		0.0402496939733183	0.121795914598251	0.0420385383459838
371	72	Parasemia plantaginis_1D_030717	Parasemia plantaginis	Parasemia	Erebidae	07/03/17	Aposematic	NHM	NHM_G.14.7.12	yes		0.0565350854447560	0.120122984670890	0.0240929029675499
372	72	Parasemia plantaginis_1V_030717	Parasemia plantaginis	Parasemia	Erebidae	07/03/17	Aposematic	NHM	NHM_G.14.7.12	yes		0.0469046635257095	0.117915538514693	0.0185383694881347
373	72	Parasemia plantaginis_2D_030717	Parasemia plantaginis	Parasemia	Erebidae	07/03/17	Aposematic	NHM	NHM_G.14.7.12	yes		0.0544264290739674	0.120420985090252	0.0323043647615974
374	72	Parasemia plantaginis_2V_030717	Parasemia plantaginis	Parasemia	Erebidae	07/03/17	Aposematic	NHM	NHM_G.14.7.12	yes		0.0454201262792453	0.117504976124302	0.0231868414950794
375	72	Parasemia plantaginis_3D_030717	Parasemia plantaginis	Parasemia	Erebidae	07/03/17	Aposematic	NHM	NHM_G.14.2.14	yes		0.0608504344316514	0.119650252452027	0.0274881570424204
376	72	Parasemia plantaginis_3V_030717	Parasemia plantaginis	Parasemia	Erebidae	07/03/17	Aposematic	NHM	NHM_G.14.2.14	yes		0.0441968372988442	0.116811436815385	0.0191379312209579
377	72	Parasemia plantaginis_4D_030717	Parasemia plantaginis	Parasemia	Erebidae	07/03/17	Aposematic	NHM	NHM_G.14.2.14	yes		0.0567312573827598	0.121632662597543	0.0297661886162075
378	72	Parasemia plantaginis_4V_030717	Parasemia plantaginis	Parasemia	Erebidae	07/03/17	Aposematic	NHM	NHM_G.14.2.14	yes		0.0442849462596079	0.117625351042137	0.0289630032829433
379	73	Parides agavus_1D_060717	Parides agavus	Parides	Papilionidae	07/06/17	Aposematic	NHM	NHM_G.14.2.14	yes		0.0424847421775395	0.117761519365597	0.107342655160025
380	73	Parides agavus_1V_060717	Parides agavus	Parides	Papilionidae	07/06/17	Aposematic	NHM	NHM_G.14.2.14	yes		0.0428872162661869	0.117382871754202	0.0863169215841497
381	73	Parides agavus_2D_060717	Parides agavus	Parides	Papilionidae	07/06/17	Aposematic	NHM	NHM_G.14.2.14	yes		0.0415124104087904	0.117084069304994	0.0873409327718303
382	73	Parides agavus_2V_060717	Parides agavus	Parides	Papilionidae	07/06/17	Aposematic	NHM	NHM_G.14.2.15	yes		0.0430766602283748	0.117025624916730	0.0766477718449726
383	73	Parides agavus_3D_060717	Parides agavus	Parides	Papilionidae	07/06/17	Aposematic	NHM	NHM_G.14.2.16	yes		0.0409547185203212	0.118170345189318	0.0213578150801826
384	73	Parides agavus_3V_060717	Parides agavus	Parides	Papilionidae	07/06/17	Aposematic	NHM	NHM_G.14.2.17	yes		0.0440360219499141	0.116468100188467	0.0221815881241354
385	74	Parides anchises_1D_050717	Parides anchises	Parides	Papilionidae	07/05/17	Aposematic	NHM	NHM_G.14.2.18	yes		0.0320396157828537	0.116948801007694	0.128624480693330
386	74	Parides anchises_1V_050717	Parides anchises	Parides	Papilionidae	07/05/17	Aposematic	NHM	NHM_G.14.2.19	yes		0.0300461726772202	0.118816571737457	0.0291772260732504
387	74	Parides anchises_2D_050717	Parides anchises	Parides	Papilionidae	07/05/17	Aposematic	NHM	NHM_G.14.2.20	yes		0.0366749527214783	0.117346729191628	0.122460140197562
388	74	Parides anchises_2V_050717	Parides anchises	Parides	Papilionidae	07/05/17	Aposematic	NHM	NHM_G.14.2.21	yes		0.0337142705505242	0.121559095915886	0.0327745549662070
389	75	Parides bunichus_1D_050717	Parides bunichus	Parides	Papilionidae	07/05/17	Aposematic	NHM	NHM_G.14.7.9	yes		0.0414460566555158	0.116688339351162	0.0168824716036199
390	75	Parides bunichus_1V_050717	Parides bunichus	Parides	Papilionidae	07/05/17	Aposematic	NHM	NHM_G.14.7.9	yes		0.0408526603156604	0.118614967625738	0.0359993301373268
391	75	Parides bunichus_2D_050717	Parides bunichus	Parides	Papilionidae	07/05/17	Aposematic	NHM	NHM_G.14.7.9	yes		0.0401804633057248	0.115408037075872	0.0256736836776482
392	75	Parides bunichus_2V_050717	Parides bunichus	Parides	Papilionidae	07/05/17	Aposematic	NHM	NHM_G.14.7.9	yes		0.0418491071573185	0.116702168091954	0.0536923017325449
393	76	Parides childrenae_1D_060717	Parides childrenae	Parides	Papilionidae	07/06/17	Aposematic	NHM	NHM_G.14.7.9	yes		0.0366536115617471	0.117347546911828	0.101499796993877
394	76	Parides childrenae_1V_060717	Parides childrenae	Parides	Papilionidae	07/06/17	Aposematic	NHM	NHM_G.14.7.9	yes		0.0308036327363886	0.115880310929431	0.0315517188630298
395	76	Parides childrenae_2D_060717	Parides childrenae	Parides	Papilionidae	07/06/17	Aposematic	NHM	NHM_G.23.3.1	yes		0.0378628412777873	0.118094314764000	0.106052397466832
396	76	Parides childrenae_2V_060717	Parides childrenae	Parides	Papilionidae	07/06/17	Aposematic	NHM	NHM_G.23.3.1	yes		0.0301844424415333	0.115679628695347	0.0327217426528175
397	76	Parides childrenae_3D_060717	Parides childrenae	Parides	Papilionidae	07/06/17	Aposematic	NHM	NHM_G.23.3.1	yes		0.0305149937399000	0.115872668907794	0.0772984852531549
398	76	Parides childrenae_3V_060717	Parides childrenae	Parides	Papilionidae	07/06/17	Aposematic	NHM	NHM_G.23.3.1	yes		0.0315179930730437	0.116526140055668	0.0335084223931837
399	76	Parides childrenae_4D_060717	Parides childrenae	Parides	Papilionidae	07/06/17	Aposematic	NHM	NHM_G.23.1.14	yes		0.0343858015842283	0.117162866268229	0.100042091347048
400	76	Parides childrenae_4V_060717	Parides childrenae	Parides	Papilionidae	07/06/17	Aposematic	NHM	NHM_G.23.1.14	yes		0.0334310797818092	0.118133454119795	0.0386682117859976
401	77	Parides erithalion_1D_050717	Parides erithalion	Parides	Papilionidae	07/05/17	Aposematic	NHM	NHM_G.23.1.14	yes		0.0376340428262558	0.115999190291453	0.0782890309208612
402	77	Parides erithalion_1V_050717	Parides erithalion	Parides	Papilionidae	07/05/17	Aposematic	NHM	NHM_G.23.1.14	yes		0.0324871253760555	0.116451482619382	0.0336567455844470
403	77	Parides erithalion_2D_050717	Parides erithalion	Parides	Papilionidae	07/05/17	Aposematic	NHM	NHM_G.23.1.14	yes		0.0349931935872895	0.116322457906630	0.0741014258949326
404	77	Parides erithalion_2V_050717	Parides erithalion	Parides	Papilionidae	07/05/17	Aposematic	NHM	NHM_G.23.1.14	yes		0.0312465191724924	0.116073960808817	0.0308398796551782
405	78	Parides lycimenes_1D_050717	Parides lycimenes	Parides	Papilionidae	07/05/17	Aposematic	NHM	NHM_G.23.1.14	yes		0.0346434217641242	0.116848877405150	0.124455938358680
406	78	Parides lycimenes_1V_050717	Parides lycimenes	Parides	Papilionidae	07/05/17	Aposematic	NHM	NHM_G.23.1.14	yes		0.0288038127196173	0.121019509416098	0.0281718986148461
407	78	Parides lycimenes_2D_050717	Parides lycimenes	Parides	Papilionidae	07/05/17	Aposematic	NHM	NHM_G.23.1.12	yes		0.0323621051023220	0.116468266364378	0.116062653364711
408	78	Parides lycimenes_2V_050717	Parides lycimenes	Parides	Papilionidae	07/05/17	Aposematic	NHM	NHM_G.23.1.12	yes		0.0304897567779131	0.119262706038398	0.0487767546570526
409	79	Parides lysander_1D_080917	Parides lysander	Parides	Papilionidae	09/08/17	Aposematic	NHM	NHM_G.23.1.12	yes		0.0339668176679160	0.116100067229391	0.0709476298316176
410	79	Parides lysander_1V_080917	Parides lysander	Parides	Papilionidae	09/08/17	Aposematic	NHM	NHM_G.23.1.12	yes		0.0388113466222052	0.118998145255854	0.0271910884820544
411	79	Parides lysander_2D_080917	Parides lysander	Parides	Papilionidae	09/08/17	Aposematic	NHM	NHM_G.22.12.3	yes		0.0345271313437945	0.115390799960110	0.0507383222285230
412	79	Parides lysander_2V_080917	Parides lysander	Parides	Papilionidae	09/08/17	Aposematic	NHM	NHM_G.22.12.3	yes		0.0404962978675834	0.118638234214095	0.0282368061237804
413	80	Parides neophilus_1D_070917	Parides neophilus	Parides	Papilionidae	09/07/17	Aposematic	NHM	NHM_G.22.12.3	yes		0.0348081302375471	0.118286953406615	0.0607979592665846
414	80	Parides neophilus_1V_070917	Parides neophilus	Parides	Papilionidae	09/07/17	Aposematic	NHM	NHM_G.22.12.3	yes		0.0367583439479496	0.121725216515284	0.0316941805868332
415	80	Parides neophilus_2D_070917	Parides neophilus	Parides	Papilionidae	09/07/17	Aposematic	NHM	NHM_G.22.8.1	yes		0.0318751266145146	0.118695894855710	0.0608706335287845
416	80	Parides neophilus_2V_070917	Parides neophilus	Parides	Papilionidae	09/07/17	Aposematic	NHM	NHM_G.22.8.1	yes		0.0337299073730499	0.122989202827704	0.0333745200336727
417	80	Parides neophilus_3D_070917	Parides neophilus	Parides	Papilionidae	09/07/17	Aposematic	NHM	NHM_G.22.8.1	yes		0.0403309298258003	0.118247998877499	0.158710633838086
418	80	Parides neophilus_3V_070917	Parides neophilus	Parides	Papilionidae	09/07/17	Aposematic	NHM	NHM_G.22.8.1	yes		0.0437574029738458	0.120643913042924	0.0302121695240256
419	80	Parides neophilus_4D_070917	Parides neophilus	Parides	Papilionidae	09/07/17	Aposematic	NHM	NHM_G.22.8.1	yes		0.0392655964994345	0.118269518519068	0.103785404416529
420	80	Parides neophilus_4V_070917	Parides neophilus	Parides	Papilionidae	09/07/17	Aposematic	NHM	NHM_G.22.8.1	yes		0.0379256407842169	0.120543787093354	0.0297794091360596
421	81	Parides proneus_1D_060717	Parides proneus	Parides	Papilionidae	07/06/17	Aposematic	NHM	NHM_G.22.8.1	yes		0.0395417988407008	0.117197073585037	0.0538767433757886
422	81	Parides proneus_1V_060717	Parides proneus	Parides	Papilionidae	07/06/17	Aposematic	NHM	NHM_G.22.8.1	yes		0.0366342849083697	0.116430987164709	0.0609655350718895
423	81	Parides proneus_2D_060717	Parides proneus	Parides	Papilionidae	07/06/17	Aposematic	NHM	NHM_G.17.2.4	yes		0.0374897775783999	0.115843379517522	0.0323729276475512
424	81	Parides proneus_2V_060717	Parides proneus	Parides	Papilionidae	07/06/17	Aposematic	NHM	NHM_G.17.2.4	yes		0.0361658607450067	0.115600485484610	0.0504431345118664
425	82	Parnassius phoebus_1D_08092017	Parnassius phoebus	Parnassius	Papilionidae	09/08/20	Aposematic	NHM	NHM_G.38.11.11	yes		0.0291222983977085	0.112525051358533	0.0105982973639634
426	82	Parnassius phoebus_1V_08092017	Parnassius phoebus	Parnassius	Papilionidae	09/08/20	Aposematic	NHM	NHM_G.38.11.11	yes		0.0247839482178704	0.112934548211293	0.0121396154660891
427	82	Parnassius phoebus_2D_08092017	Parnassius phoebus	Parnassius	Papilionidae	09/08/20	Aposematic	NHM	NHM_G.38.11.11	yes		0.0341576233110721	0.113355550400419	0.0266501121440318
428	82	Parnassius phoebus_2V_08092017	Parnassius phoebus	Parnassius	Papilionidae	09/08/20	Aposematic	NHM	NHM_G.38.11.11	yes		0.0289696173863894	0.112994436177283	0.0218446025612084
429	82	Parnassius phoebus_3D_08092017	Parnassius phoebus	Parnassius	Papilionidae	09/08/20	Aposematic	NHM	NHM_G.38.11.11	yes		0.0316830489151457	0.113139379903523	0.0298018968527586
430	82	Parnassius phoebus_3V_08092017	Parnassius phoebus	Parnassius	Papilionidae	09/08/20	Aposematic	NHM	NHM_G.38.11.11	yes		0.0269579981652174	0.112854501479701	0.0259860748062552
431	82	Parnassius phoebus_4D_08092017	Parnassius phoebus	Parnassius	Papilionidae	09/08/20	Aposematic	NHM	NHM_G.31.11.1	yes		0.0333047032249280	0.113025397286506	0.0497232543281716
432	82	Parnassius phoebus_4V_08092017	Parnassius phoebus	Parnassius	Papilionidae	09/08/20	Aposematic	NHM	NHM_G.31.11.1	yes		0.0320179407856841	0.113470596620403	0.0354311886453032
433	83	Pieris rapae_1D_030717	Pieris rapae	Pieris	Pieridae	07/03/17	Aposematic	NHM	NHM_G.25.1.12	yes		0.0193774122493649	0.117654951097503	0.00585024079343927
434	83	Pieris rapae_1V_030717	Pieris rapae	Pieris	Pieridae	07/03/17	Aposematic	NHM	NHM_G.25.1.12	yes		0.0173044418400904	0.119504668182091	0.0102492176452350
435	83	Pieris rapae_2D_030717	Pieris rapae	Pieris	Pieridae	07/03/17	Aposematic	NHM	NHM_G.24.5.9	yes		0.0211990370508748	0.117057821911140	0.00866296504092143
436	83	Pieris rapae_2V_030717	Pieris rapae	Pieris	Pieridae	07/03/17	Aposematic	NHM	NHM_G.24.5.9	yes		0.0199583426303709	0.118195196008606	0.0135619860012524
437	83	Pieris rapae_3D_030717	Pieris rapae	Pieris	Pieridae	07/03/17	Aposematic	NHM	NHM_G.24.5.9	yes		0.0197368845588448	0.114293668504512	0.00753858572016317
438	83	Pieris rapae_3V_030717	Pieris rapae	Pieris	Pieridae	07/03/17	Aposematic	NHM	NHM_G.24.5.9	yes		0.0168530796285589	0.114643006080961	0.00917110651312815
439	84	Placidula_eurynassa_1D_060318	Placidula euryanassa	Placidula	Nymphalidae	03/06/18	Aposematic	Manchester		yes		0.0382721657579444	0.120170638990683	0.0520138291608387
440	84	Placidula_eurynassa_1V_060318	Placidula euryanassa	Placidula	Nymphalidae	03/06/18	Aposematic	Manchester		yes		0.0409225529641594	0.119480142284548	0.0430560660290918
441	85	Poladryas arachne_1D_050717	Poladryas arachne	Poladryas	Nymphalidae	07/05/17	Aposematic	NHM	NHM_G.24.5.8	yes		0.0443377395697418	0.112735916203598	0.0456716764834302
442	85	Poladryas arachne_1V_050717	Poladryas arachne	Poladryas	Nymphalidae	07/05/17	Aposematic	NHM	NHM_G.24.5.8	yes		0.0423279218323357	0.114240230298272	0.0623217847098974
443	85	Poladryas arachne_2D_050717	Poladryas arachne	Poladryas	Nymphalidae	07/05/17	Aposematic	NHM	NHM_G.24.5.8	yes		0.0407483551214440	0.114272681087410	0.0367863552412677
444	85	Poladryas arachne_2V_050717	Poladryas arachne	Poladryas	Nymphalidae	07/05/17	Aposematic	NHM	NHM_G.24.5.8	yes		0.0401402955519284	0.114475900671795	0.0547408092389725
445	86	Pontia occidentalis_1D_070917	Pontia occidentalis	Pontia	Pieridae	09/07/17	Aposematic	NHM	NHM_G.73.2.2	yes		0.0202939653399404	0.119966966028865	0.00838762306002097
446	86	Pontia occidentalis_1V_070917	Pontia occidentalis	Pontia	Pieridae	09/07/17	Aposematic	NHM	NHM_G.73.2.2	yes		0.0169476533875926	0.119521640015219	0.00569692814474491
447	86	Pontia occidentalis_2D_070917	Pontia occidentalis	Pontia	Pieridae	09/07/17	Aposematic	NHM	NHM_G.73.2.2	no	ventral side missing	0.0193085991388668	0.119610299101648	0.00672033613882779
448	86	Pontia occidentalis_2V_070917	Pontia occidentalis	Pontia	Pieridae	09/07/17	Aposematic	NHM	NHM_G.73.2.2	n/a	n/a	NaN	NaN	NaN
449	86	Pontia occidentalis_3D_080917	Pontia occidentalis	Pontia	Pieridae	09/08/17	Aposematic	NHM	NHM_G.73.2.2	yes		0.0236026029317961	0.114580298501668	0.0131352090789781
450	86	Pontia occidentalis_3V_080917	Pontia occidentalis	Pontia	Pieridae	09/08/17	Aposematic	NHM	NHM_G.73.2.2	yes		0.0175019829645914	0.115940996958038	0.00864007875227330
451	86	Pontia occidentalis_4D_080917	Pontia occidentalis	Pontia	Pieridae	09/08/17	Aposematic	NHM	NHM_G.73.2.2	yes		0.0227305360902917	0.114170204686945	0.0118731547969397
452	86	Pontia occidentalis_4V_080917	Pontia occidentalis	Pontia	Pieridae	09/08/17	Aposematic	NHM	NHM_G.73.2.2	yes		0.0190224343151195	0.114437321410061	0.0134046838645036
453	87	Spilosoma lubricipeda_1D_030717	Spilosoma lubricipeda	Spilosoma	Erebidae	07/03/17	Aposematic	NHM	NHM_G.60.2.4	yes		0.0199468758987206	0.120919556887586	0.0242649203494897
454	87	Spilosoma lubricipeda_1V_030717	Spilosoma lubricipeda	Spilosoma	Erebidae	07/03/17	Aposematic	NHM	NHM_G.60.2.4	yes		0.0239059079528700	0.119627906477301	0.0167026340099252
455	87	Spilosoma lubricipeda_2D_030717	Spilosoma lubricipeda	Spilosoma	Erebidae	07/03/17	Aposematic	NHM	NHM_G.60.2.4	yes		0.0241375654635444	0.121376665349301	0.0239555961107986
456	87	Spilosoma lubricipeda_2V_030717	Spilosoma lubricipeda	Spilosoma	Erebidae	07/03/17	Aposematic	NHM	NHM_G.60.2.4	yes		0.0224312407863048	0.119308965710240	0.0225414620275275
457	88	Stalachtis phlegia_1D_050917	Stalachtis phlegia	Stalachtis	Riodinidae	09/05/17	Aposematic	NHM	NHM_G.59.3.7	yes		0.0623005168939151	0.122395184762233	0.0754983559035433
458	88	Stalachtis phlegia_1V_050917	Stalachtis phlegia	Stalachtis	Riodinidae	09/05/17	Aposematic	NHM	NHM_G.59.3.7	yes		0.0670059851348354	0.123166098594855	0.0838096678290630
459	88	Stalachtis phlegia_2D_050917	Stalachtis phlegia	Stalachtis	Riodinidae	09/05/17	Aposematic	NHM	NHM_G.59.3.7	yes		0.0599996173299907	0.122436329376298	0.0739148934314440
460	88	Stalachtis phlegia_2V_050917	Stalachtis phlegia	Stalachtis	Riodinidae	09/05/17	Aposematic	NHM	NHM_G.59.3.7	yes		0.0645436294526680	0.121784105693179	0.0770031928962163
461	89	Syntomeida epilais_1D_160517	Syntomeida epilais	Syntomeida	Erebidae (Arctiidae)	17/05/16	Aposematic	NHM	NHM_G.59.3.7	yes		0.0523232194073521	0.118461243731324	0.0297643307879915
462	89	Syntomeida epilais_1V_160517	Syntomeida epilais	Syntomeida	Erebidae (Arctiidae)	17/05/16	Aposematic	NHM	NHM_G.59.3.7	yes		0.0483630950505933	0.118308845193372	0.0296910586412963
463	89	Syntomeida epilais_2D_160517	Syntomeida epilais	Syntomeida	Erebidae (Arctiidae)	17/05/16	Aposematic	NHM	NHM_G.59.3.7	yes		0.0509432914589825	0.118242568032182	0.0331230140434722
464	89	Syntomeida epilais_2V_160517	Syntomeida epilais	Syntomeida	Erebidae (Arctiidae)	17/05/16	Aposematic	NHM	NHM_G.59.3.7	yes		0.0541842114559701	0.118532487537847	0.0405635148612334
465	89	Syntomeida _epilais_1D_060318	Syntomeida epilais	Syntomeida	Erebidae (Arctiidae)	03/06/18	Aposematic	NHM	NHM_G.59.3.7	yes		0.0514843912156076	0.118464328593614	0.0307839719847416
466	89	Syntomeida _epilais_1V_060318	Syntomeida epilais	Syntomeida	Erebidae (Arctiidae)	03/06/18	Aposematic	NHM	NHM_G.59.3.7	yes		0.0501127150295176	0.118419750430379	0.0242453157751382
467	90	Taenaris_onolaus_1D_060318	Taenaris onolaus	Taenaris	Nymphalidae	03/06/18	Aposematic	Manchester		yes		0.0184169985101797	0.115244596796319	0.0245075562756918
468	90	Taenaris_onolaus_1V_060318	Taenaris onolaus	Taenaris	Nymphalidae	03/06/18	Aposematic	Manchester		yes		0.0277601249326783	0.115734593744227	0.0513798033620819
469	91	Thessalia leanira_1D_050717	Thessalia leanira	Thessalia	Nymphalidae	07/05/17	Aposematic	NHM	NHM.G.42.14.8	yes		0.0670670743795108	0.121253799382386	0.0308732619024636
470	91	Thessalia leanira_1V_050717	Thessalia leanira	Thessalia	Nymphalidae	07/05/17	Aposematic	NHM	NHM.G.42.14.8	yes		0.0624537422810967	0.119540118140405	0.0782660491241940
471	91	Thessalia leanira_2D_050717	Thessalia leanira	Thessalia	Nymphalidae	07/05/17	Aposematic	NHM	NHM.G.42.14.8	yes		0.0579249267098836	0.120538819936949	0.0233936308271773
472	91	Thessalia leanira_2V_050717	Thessalia leanira	Thessalia	Nymphalidae	07/05/17	Aposematic	NHM	NHM.G.42.14.8	yes		0.0557999065452421	0.119982772389328	0.0698023436618954
473	92	Urania fulgens_1D_080218	Urania fulgens	Urania	Uraniidae	02/08/18	Aposematic	Manchester		yes		0.0518176027139702	0.116519182481104	0.0321550312706870
474	92	Urania fulgens_1V_080218	Urania fulgens	Urania	Uraniidae	02/08/18	Aposematic	Manchester		yes		0.0534759464941288	0.116279897637168	0.0571947658523567
475	92	Urania fulgens_2D_080218	Urania fulgens	Urania	Uraniidae	02/08/18	Aposematic	Manchester		yes		0.0488144815201085	0.115941849302020	0.0417369587419906
476	92	Urania fulgens_2V_080218	Urania fulgens	Urania	Uraniidae	02/08/18	Aposematic	Manchester		yes		0.0537771740683001	0.116287460532268	0.0565238839129483
477	93	Utetheisa galapagensis_1D_030717	Utetheisa galapagensis / Euchelia galapagenis	Utetheisa	Erebidae	07/03/17	Aposematic	NHM	NHM.G.37.7.6	yes		0.0202430778574454	0.113348358613846	0.0163534153052456
478	93	Utetheisa galapagensis_1V_030717	Utetheisa galapagensis / Euchelia galapagenis	Utetheisa	Erebidae	07/03/17	Aposematic	NHM	NHM.G.37.7.6	yes		0.0236778425636723	0.116957623846663	0.0156351123244848
479	93	Utetheisa galapagensis_2D_030717	Utetheisa galapagensis / Euchelia galapagenis	Utetheisa	Erebidae	07/03/17	Aposematic	NHM	NHM.G.17.14.8	yes		0.0227716218996108	0.112979015401783	0.0138939649326422
480	93	Utetheisa galapagensis_2V_030717	Utetheisa galapagensis / Euchelia galapagenis	Utetheisa	Erebidae	07/03/17	Aposematic	NHM	NHM.G.17.14.8	yes		0.0214269433308607	0.116328579068639	0.0134061870080152
481	94	Zerenopsis lepida_1D_080218	Zerenopsis leopardina/lepida	Zerenopsis	Geometridae	02/08/18	Aposematic	Manchester		yes		0.0342314205193389	0.117746249445252	0.0460198081243309
482	94	Zerenopsis lepida_1V_080218	Zerenopsis leopardina/lepida	Zerenopsis	Geometridae	02/08/18	Aposematic	Manchester		yes		0.0342027680191167	0.118734555498737	0.0462910231878132
483	95	Zygaena filipendulae_1D_070218	Zygaena filipendulae	Zygaena	Zygaenidae	02/07/18	Aposematic	Manchester		yes		0.0271825194217569	0.114466824874823	0.193346497311879
484	95	Zygaena filipendulae_1V_070218	Zygaena filipendulae	Zygaena	Zygaenidae	02/07/18	Aposematic	Manchester		yes		0.0285336882141138	0.113963452170938	0.129634734660449
485	96	Zygaena trifolii_1D_070218	Zygaena trifolii	Zygaena	Zygaenidae	02/07/18	Aposematic	Manchester		yes		0.0241347643946881	0.115120845832976	0.189039988028134
486	96	Zygaena trifolii_1V_070218	Zygaena trifolii	Zygaena	Zygaenidae	02/07/18	Aposematic	Manchester		yes		0.0344421110909445	0.113278794716568	0.132216089576622
487	96	Zygaena trifolii_2D_070218	Zygaena trifolii	Zygaena	Zygaenidae	02/07/18	Aposematic	Manchester		yes		0.0264891270078446	0.117358079313507	0.199365406468315
488	96	Zygaena trifolii_2V_070218	Zygaena trifolii	Zygaena	Zygaenidae	02/07/18	Aposematic	Manchester		yes		0.0230188845774575	0.113026999829241	0.152640143099717
489	97	Agrotis exclamationis_1D_070218	Agrotis exclamationis	Agrotis	Noctuidae	02/07/18	Non-aposematic	Manchester		yes		0.0221688236831432	0.112969650244401	0.0301092748808158
490	97	Agrotis exclamationis_1V_070218	Agrotis exclamationis	Agrotis	Noctuidae	02/07/18	Non-aposematic	Manchester		yes		0.0201492487878530	0.114461068881857	0.0276064590657650
491	97	Agrotis exclamationis_2D_070218	Agrotis exclamationis	Agrotis	Noctuidae	02/07/18	Non-aposematic	Manchester		yes		0.0213488492339862	0.112575510064986	0.0382198809274242
492	97	Agrotis exclamationis_2V_070218	Agrotis exclamationis	Agrotis	Noctuidae	02/07/18	Non-aposematic	Manchester		yes		0.0219360094663685	0.114658660795393	0.0267389892189158
493	98	Aphrissa boisduvalii_1D_07092017	Aphrissa boisduvalii	Aphrissa	Pieridae	09/07/20	Non-aposematic	NHM	NHM_3.1.17.6	yes		0.0137009593601909	0.120690599884437	0.00540039731210184
494	98	Aphrissa boisduvalii_1V_07092017	Aphrissa boisduvalii	Aphrissa	Pieridae	09/07/20	Non-aposematic	NHM	NHM_3.1.17.6	yes		0.00979899692857769	0.119865085193538	0.00288708121950556
495	98	Aphrissa boisduvalii_2D_07092017	Aphrissa boisduvalii	Aphrissa	Pieridae	09/07/20	Non-aposematic	NHM	NHM_3.1.17.6	yes		0.0157093174891383	0.118491828985063	0.0129665327336803
496	98	Aphrissa boisduvalii_2V_07092017	Aphrissa boisduvalii	Aphrissa	Pieridae	09/07/20	Non-aposematic	NHM	NHM_3.1.17.6	yes		0.0131389514948897	0.120248428127055	0.00573736323640658
497	98	Aphrissa boisduvalii_3D_07092017	Aphrissa boisduvalii	Aphrissa	Pieridae	09/07/20	Non-aposematic	NHM	NHM_G.12.20.7	yes		0.0160152527076096	0.117627502661874	0.0172453602938130
498	98	Aphrissa boisduvalii_3V_07092017	Aphrissa boisduvalii	Aphrissa	Pieridae	09/07/20	Non-aposematic	NHM	NHM_G.12.20.7	yes		0.0144023054025330	0.116175358298643	0.0155408213478059
499	98	Aphrissa boisduvalii_4D_07092017	Aphrissa boisduvalii	Aphrissa	Pieridae	09/07/20	Non-aposematic	NHM	NHM_G.12.20.7	yes		0.0181596535679354	0.118959227120871	0.0127669682218922
500	98	Aphrissa boisduvalii_4V_07092017	Aphrissa boisduvalii	Aphrissa	Pieridae	09/07/20	Non-aposematic	NHM	NHM_G.12.20.7	yes		0.0124803362840375	0.119283637144361	0.00954083683971438
501	99	Aphrissa statira_1D_07092017	Aphrissa statira	Aphrissa	Pieridae	09/07/20	Non-aposematic	NHM	NHM_G.10.9.3	yes		0.0147042930420931	0.117566334894713	0.00587035466691820
502	99	Aphrissa statira_1V_07092017	Aphrissa statira	Aphrissa	Pieridae	09/07/20	Non-aposematic	NHM	NHM_G.10.9.3	yes		0.0120040088896516	0.117484452913489	0.00684940901206771
503	99	Aphrissa statira_2D_07092017	Aphrissa statira	Aphrissa	Pieridae	09/07/20	Non-aposematic	NHM	NHM_G.10.9.3	yes		0.0129810737091343	0.118862495375443	0.00386193609142498
504	99	Aphrissa statira_2V_07092017	Aphrissa statira	Aphrissa	Pieridae	09/07/20	Non-aposematic	NHM	NHM_G.10.9.3	yes		0.0112102306079117	0.118640200373882	0.00292427371046004
505	99	Aphrissa statira_3D_07092017	Aphrissa statira	Aphrissa	Pieridae	09/07/20	Non-aposematic	NHM	NHM_G.12.18.3	yes		0.0164861520567609	0.115485957825890	0.0185147051377180
506	99	Aphrissa statira_3V_07092017	Aphrissa statira	Aphrissa	Pieridae	09/07/20	Non-aposematic	NHM	NHM_G.12.18.3	yes		0.0128447149040597	0.114070252426001	0.0133949995637596
507	99	Aphrissa statira_4D_07092017	Aphrissa statira	Aphrissa	Pieridae	09/07/20	Non-aposematic	NHM	NHM_G.12.18.3	yes		0.0169857150062887	0.116139696149426	0.0156170540239313
508	99	Aphrissa statira_4V_07092017	Aphrissa statira	Aphrissa	Pieridae	09/07/20	Non-aposematic	NHM	NHM_G.12.18.3	yes		0.0133579779721396	0.114488648287416	0.0160054198931373
509	100	Appias drusilla_1D_08092017	Appias drusilla	Appias	Pieridae	09/08/20	Non-aposematic	NHM	NHMG_G.10.18.14	yes		0.0167296094273371	0.120914739099387	0.00506109132242024
510	100	Appias drusilla_1V_08092017	Appias drusilla	Appias	Pieridae	09/08/20	Non-aposematic	NHM	NHMG_G.10.18.14	yes		0.0169403239889191	0.119302094012999	0.00622608584190425
511	100	Appias drusilla_2D_08092017	Appias drusilla	Appias	Pieridae	09/08/20	Non-aposematic	NHM	NHMG_G.10.18.14	yes		0.0182626287955852	0.124778590757457	0.00519742508322187
512	100	Appias drusilla_2V_08092017	Appias drusilla	Appias	Pieridae	09/08/20	Non-aposematic	NHM	NHMG_G.10.18.14	yes		0.0168976520921726	0.125369004338174	0.00485967867513361
513	100	Appias drusilla_3D_08092017	Appias drusilla	Appias	Pieridae	09/08/20	Non-aposematic	NHM	NHMG_G.10.6.13	yes		0.0197605929582976	0.122246695275051	0.0123778921297984
514	100	Appias drusilla_3V_08092017	Appias drusilla	Appias	Pieridae	09/08/20	Non-aposematic	NHM	NHMG_G.10.6.13	yes		0.0155069646321234	0.122766872152019	0.0103349462506531
515	100	Appias drusilla_4D_08092017	Appias drusilla	Appias	Pieridae	09/08/20	Non-aposematic	NHM	NHMG_G.10.6.13	yes		0.0199321680415895	0.120491837735853	0.0120164595981601
516	100	Appias drusilla_4V_08092017	Appias drusilla	Appias	Pieridae	09/08/20	Non-aposematic	NHM	NHMG_G.10.6.13	yes		0.0142172467055455	0.119495165463449	0.0101733280861696
517	100	Appias drusilla_5D_08092017	Appias drusilla	Appias	Pieridae	09/08/20	Non-aposematic	NHM	NHMG_G.10.14.15	yes		0.0221260578650713	0.115701469127233	0.0221284812329194
518	100	Appias drusilla_5V_08092017	Appias drusilla	Appias	Pieridae	09/08/20	Non-aposematic	NHM	NHMG_G.10.14.15	yes		0.0167304606635902	0.117569376918602	0.0112310662882442
519	100	Appias drusilla_6D_08092017	Appias drusilla	Appias	Pieridae	09/08/20	Non-aposematic	NHM	NHMG_G.10.14.15	yes		0.0220341355053133	0.115724561720730	0.0186437404495503
520	100	Appias drusilla_6V_08092017	Appias drusilla	Appias	Pieridae	09/08/20	Non-aposematic	NHM	NHMG_G10.14.15	yes		0.0177772335858615	0.117400953977939	0.0130131318032908
521	101	Ascalapha odorata_1D_080218	Ascalapha odorata	Ascalapha	Erebidae	02/08/18	Non-aposematic	Manchester		yes		0.0298671480858096	0.112404373964264	0.0245697465805335
522	101	Ascalapha odorata_1V_080218	Ascalapha odorata	Ascalapha	Erebidae	02/08/18	Non-aposematic	Manchester		yes		0.0171379750225728	0.112326885931357	0.0186835289991212
523	101	Ascalapha odorata_2D_080218	Ascalapha odorata	Ascalapha	Erebidae	02/08/18	Non-aposematic	Manchester		yes		0.0183850279388569	0.110983871201064	0.0189047560506475
524	101	Ascalapha odorata_2V_080218	Ascalapha odorata	Ascalapha	Erebidae	02/08/18	Non-aposematic	Manchester		yes		0.0131173389964788	0.113436513742833	0.0162288787460606
525	102	Ascotis selenaria_1D_160517	Ascotis selenaria	Ascotis	Geometridae	17/05/16	Non-aposematic	NHM	NHM_G.14.6.6	yes		0.0252871249843141	0.111309056345359	0.0137905878793197
526	102	Ascotis selenaria_1V_160517	Ascotis selenaria	Ascotis	Geometridae	17/05/16	Non-aposematic	NHM	NHM_G.14.6.6	yes		0.0188726793159416	0.112068842980527	0.0127998524612903
527	102	Ascotis selenaria_2D_160517	Ascotis selenaria	Ascotis	Geometridae	17/05/16	Non-aposematic	NHM	NHM_G.14.6.6	yes		0.0240753268657040	0.111119974223416	0.0132891587565472
528	102	Ascotis selenaria_2V_160517	Ascotis selenaria	Ascotis	Geometridae	17/05/16	Non-aposematic	NHM	NHM_G.14.6.6	yes		0.0210919082215948	0.111370850532409	0.0160516547575216
529	103	Autographa gamma_1D_070218	Autographa gamma	Autographa	Noctuidae	02/07/18	Non-aposematic	Manchester		yes		0.0368858372892225	0.113261845539950	0.0197663761950682
530	103	Autographa gamma_1V_070218	Autographa gamma	Autographa	Noctuidae	02/07/18	Non-aposematic	Manchester		yes		0.0198616366931580	0.113389212915497	0.0147730694213580
531	103	Autographa gamma_2D_070218	Autographa gamma	Autographa	Noctuidae	02/07/18	Non-aposematic	Manchester		yes		0.0287962492512879	0.112471862307488	0.0223318005116068
532	103	Autographa gamma_2V_070218	Autographa gamma	Autographa	Noctuidae	02/07/18	Non-aposematic	Manchester		yes		0.0184496204444122	0.113877809889598	0.0152577899774409
533	104	Biston betularia_1D_150517	Biston betularia	Biston	Geometridae	17/05/15	Non-aposematic	NHM	NHM_G.43.3.6	yes		0.0298531024956210	0.115805735464891	0.0129305893226317
534	104	Biston betularia_1V_150517	Biston betularia	Biston	Geometridae	17/05/15	Non-aposematic	NHM	NHM_G.43.3.6	yes		0.0260713141904954	0.113930268280977	0.0121102791799013
535	104	Biston betularia_2D_150517	Biston betularia	Biston	Geometridae	17/05/15	Non-aposematic	NHM	NHM_G.43.3.14	yes		0.0276599699404254	0.116040428929434	0.0133079378538087
536	104	Biston betularia_2V_150517	Biston betularia	Biston	Geometridae	17/05/15	Non-aposematic	NHM	NHM_G.43.3.14	yes		0.0275236115248153	0.113373272072588	0.0134538432596038
537	104	Biston betularia_3D_150517	Biston betularia	Biston	Geometridae	17/05/15	Non-aposematic	NHM	NHM_G.43.3.14	yes		0.0409986979467660	0.113466964614791	0.0187149143728057
538	104	Biston betularia_3V_150517	Biston betularia	Biston	Geometridae	17/05/15	Non-aposematic	NHM	NHM_G.43.3.14	yes		0.0334045176187678	0.113153065110006	0.0158080756633788
539	104	Biston betularia_4D_150517	Biston betularia	Biston	Geometridae	17/05/15	Non-aposematic	NHM	NHM_G.41.10.3	yes		0.0390385227504972	0.111679798322126	0.0210248082715660
540	104	Biston betularia_4V_150517	Biston betularia	Biston	Geometridae	17/05/15	Non-aposematic	NHM	NHM_G.41.10.3	yes		0.0312389230601753	0.112205716987242	0.0196092878657321
541	104	Biston betularia_5D_150517	Biston betularia	Biston	Geometridae	17/05/15	Non-aposematic	NHM	NHM_G.41.10.3	yes		0.0364084565541379	0.111659572284866	0.0177473778196885
542	104	Biston betularia_5V_150517	Biston betularia	Biston	Geometridae	17/05/15	Non-aposematic	NHM	NHM_G.41.10.3	yes		0.0286625674782699	0.111700569101756	0.0214398573961036
543	105	Cercyonis pegala_1D_050917	Cercyonis pegala	Cercyonis	Nymphalidae	09/05/17	Non-aposematic	NHM	NHM_G.39.11.3	yes		0.0222772586230285	0.114461469873050	0.0251192609908173
544	105	Cercyonis pegala_1V_050917	Cercyonis pegala	Cercyonis	Nymphalidae	09/05/17	Non-aposematic	NHM	NHM_G.39.11.3	yes		0.0382112189812706	0.116157620829845	0.0204949822726098
545	105	Cercyonis pegala_2D_050917	Cercyonis pegala	Cercyonis	Nymphalidae	09/05/17	Non-aposematic	NHM	NHM_G.39.11.3	yes		0.0212432218303818	0.114244869408821	0.0184428852115641
546	105	Cercyonis pegala_2V_050917	Cercyonis pegala	Cercyonis	Nymphalidae	09/05/17	Non-aposematic	NHM	NHM_G.39.11.3	yes		0.0405752088777612	0.116074175413202	0.0239762266010143
547	105	Cercyonis pegala_3D_050917	Cercyonis pegala	Cercyonis	Nymphalidae	09/05/17	Non-aposematic	NHM	NHM_G.37.6.8	yes		0.0245677973743012	0.114649020802361	0.0204656644735173
548	105	Cercyonis pegala_3V_050917	Cercyonis pegala	Cercyonis	Nymphalidae	09/05/17	Non-aposematic	NHM	NHM_G.37.6.8	yes		0.0404706881031483	0.116567050022944	0.0240709733314938
549	105	Cercyonis pegala_4D_050917	Cercyonis pegala	Cercyonis	Nymphalidae	09/05/17	Non-aposematic	NHM	NHM_G.37.6.8	yes		0.0216381326516750	0.114965234250912	0.0228860906427258
550	105	Cercyonis pegala_4V_050917	Cercyonis pegala	Cercyonis	Nymphalidae	09/05/17	Non-aposematic	NHM	NHM_G.37.6.8	yes		0.0399972392439643	0.116884577892910	0.0271434758720994
551	106	Colobura dirce_1D_08092017	Colobura dirce	Colobura	Nymphalidae	09/08/20	Non-aposematic	NHM	NHM_LG.87.11.18	yes		0.0307667889528415	0.115055963171751	0.0160666105395199
552	106	Colobura dirce_1V_08092017	Colobura dirce	Colobura	Nymphalidae	09/08/20	Non-aposematic	NHM	NHM_LG.87.11.18	yes		0.0562275131789885	0.121848531035481	0.0234675726613338
553	106	Colobura dirce_2D_08092017	Colobura dirce	Colobura	Nymphalidae	09/08/20	Non-aposematic	NHM	NHM_LG.87.11.18	yes		0.0297107984347502	0.115279721750831	0.0155850751808668
554	106	Colobura dirce_2V_08092017	Colobura dirce	Colobura	Nymphalidae	09/08/20	Non-aposematic	NHM	NHM_LG.96.10.11	yes		0.0531771300800200	0.118788121409609	0.0232787675990071
555	107	Colotois pennaria_1D_150517	Colotois pennaria	Colotois	Geometridae	17/05/15	Non-aposematic	NHM	NHM_LG.96.10.11	yes		0.0164625969131271	0.112700973532137	0.0238919886241148
556	107	Colotois pennaria_1V_150517	Colotois pennaria	Colotois	Geometridae	17/05/15	Non-aposematic	NHM	NHM_LG.96.10.11	yes		0.0166441156963085	0.112126677481673	0.0211414620628833
557	107	Colotois pennaria_2D_150517	Colotois pennaria	Colotois	Geometridae	17/05/15	Non-aposematic	NHM	NHM_LG.96.10.11	yes		0.0219696291156241	0.112582266719286	0.0266790563104316
558	107	Colotois pennaria_2V_150517	Colotois pennaria	Colotois	Geometridae	17/05/15	Non-aposematic	NHM	NHM_LG.70.020_13	yes		0.0204004777207792	0.112070182476763	0.0261364482251943
559	108	Eunica monima_1D_060917	Eunica monima	Eunica	Nymphalidae	09/06/17	Non-aposematic	NHM	NHM_G.17.2.4	yes		0.0311723327249512	0.117983316447046	0.0212725604610889
560	108	Eunica monima_1V_060917	Eunica monima	Eunica	Nymphalidae	09/06/17	Non-aposematic	NHM	NHM_G.17.2.4	yes		0.0272899688795012	0.116023695026003	0.0244250545308421
561	108	Eunica monima_2D_060917	Eunica monima	Eunica	Nymphalidae	09/06/17	Non-aposematic	NHM	NHM_G.17.2.4	yes		0.0294210482441101	0.116979387920909	0.0268930178451292
562	108	Eunica monima_2V_060917	Eunica monima	Eunica	Nymphalidae	09/06/17	Non-aposematic	NHM	NHM_G.17.2.4	yes		0.0255136834112482	0.115355120736493	0.0239508126400966
563	109	Eutrapela clemataria_1D_160517	Eutrapela clemataria	Eutrapela	Geometridae	17/05/16	Non-aposematic	NHM	NHM_G.37.7.10	yes		0.0190232504597149	0.112283291483247	0.0172270654801613
564	109	Eutrapela clemataria_1V_160517	Eutrapela clemataria	Eutrapela	Geometridae	17/05/16	Non-aposematic	NHM	NHM_G.37.7.10	yes		0.0151294449980828	0.111862599133108	0.0111709529151718
565	109	Eutrapela clemataria_2D_160517	Eutrapela clemataria	Eutrapela	Geometridae	17/05/16	Non-aposematic	NHM	NHM_G.37.7.10	yes		0.0191318800240612	0.111810834633333	0.0160211412103999
566	109	Eutrapela clemataria_2V_160517	Eutrapela clemataria	Eutrapela	Geometridae	17/05/16	Non-aposematic	NHM	NHM_G.37.7.10	yes		0.0181060536238943	0.111703231897905	0.0122691373347548
567	110	Galleria mellonella_1D_080218	Galleria mellonella	Galleria	Pyralidae	02/08/18	Non-aposematic	Manchester		yes		0.0300760691974842	0.113280991943688	0.0301279787544612
568	110	Galleria mellonella_1V_080218	Galleria mellonella	Galleria	Pyralidae	02/08/18	Non-aposematic	Manchester		yes		0.0285714100409813	0.113547046203432	0.0354627566045478
569	110	Galleria mellonella_2D_080218	Galleria mellonella	Galleria	Pyralidae	02/08/18	Non-aposematic	Manchester		yes		0.0219795187466871	0.113166926881589	0.0270809150744812
570	110	Galleria mellonella_2V_080218	Galleria mellonella	Galleria	Pyralidae	02/08/18	Non-aposematic	Manchester		yes		0.0231651976120295	0.113225315066978	0.0211570253178901
571	111	Hamadryas chloe_1D_060917	Hamadryas chloe	Hamadryas	Nymphalidae	09/06/17	Non-aposematic	NHM	NHM_G.39.9.3	yes		0.0260272577747105	0.112461863001272	0.0424180076833922
572	111	Hamadryas chloe_1V_060917	Hamadryas chloe	Hamadryas	Nymphalidae	09/06/17	Non-aposematic	NHM	NHM_G.39.9.3	yes		0.0269089709686202	0.113823974708852	0.0216851266750032
573	111	Hamadryas chloe_2D_060917	Hamadryas chloe	Hamadryas	Nymphalidae	09/06/17	Non-aposematic	NHM	NHM_G.39.9.3	yes		0.0336481207222953	0.111902831261977	0.0384385583189566
574	111	Hamadryas chloe_2V_060917	Hamadryas chloe	Hamadryas	Nymphalidae	09/06/17	Non-aposematic	NHM	NHM_G.39.9.3	yes		0.0426004686940070	0.115788005736263	0.0269011703554227
575	111	Hamadryas chloe_3D_060917	Hamadryas chloe	Hamadryas	Nymphalidae	09/06/17	Non-aposematic	NHM	NHM_G.42.10.2	yes		0.0287005885276404	0.111642058864210	0.0346362539546220
576	111	Hamadryas chloe_3V_060917	Hamadryas chloe	Hamadryas	Nymphalidae	09/06/17	Non-aposematic	NHM	NHM_G.42.10.2	yes		0.0357784038221702	0.116488804902503	0.0334681149240950
577	111	Hamadryas chloe_4D_060917	Hamadryas chloe	Hamadryas	Nymphalidae	09/06/17	Non-aposematic	NHM	NHM_G.42.10.2	yes		0.0314911455303079	0.112093871821428	0.0323846766736417
578	111	Hamadryas chloe_4V_060917	Hamadryas chloe	Hamadryas	Nymphalidae	09/06/17	Non-aposematic	NHM	NHM_G.42.10.2	yes		0.0346123758253232	0.116743593245331	0.0297651399433208
579	111	Hamadryas chloe_5D_060917	Hamadryas chloe	Hamadryas	Nymphalidae	09/06/17	Non-aposematic	NHM	NHM_G.42.12.13	yes		0.0379783782491014	0.113368949960908	0.0372669354609672
580	111	Hamadryas chloe_5V_060917	Hamadryas chloe	Hamadryas	Nymphalidae	09/06/17	Non-aposematic	NHM	NHM_G.42.12.13	yes		0.0385806661364399	0.115486774104915	0.0270599601372186
581	111	Hamadryas chloe_6D_060917	Hamadryas chloe	Hamadryas	Nymphalidae	09/06/17	Non-aposematic	NHM	NHM_G.42.12.13	yes		0.0332580987312920	0.113894454893722	0.0221754411497815
582	111	Hamadryas chloe_6V_060917	Hamadryas chloe	Hamadryas	Nymphalidae	09/06/17	Non-aposematic	NHM	NHM_G.42.12.13	yes		0.0365860824047387	0.114554669604955	0.0186627281485868
583	112	Historis odius_1D_070218	Historis odius	Historis	Nymphalidae	02/07/18	Non-aposematic	AMNH		yes		0.0236078159678511	0.114825146844756	0.0683484025687826
584	112	Historis odius_1V_070218	Historis odius	Historis	Nymphalidae	02/07/18	Non-aposematic	AMNH		yes		0.0233824853269934	0.112559075826099	0.0473029407863173
585	113	Junonia coenia_1D_180517	Junonia coenia	Junonia	Nymphalidae	17/05/18	Non-aposematic	NHM	NHM_3.1.6.5	yes		0.0387825300945476	0.115554602588277	0.0366961388178142
586	113	Junonia coenia_1V_180517	Junonia coenia	Junonia	Nymphalidae	17/05/18	Non-aposematic	NHM	NHM_3.1.6.5	yes		0.0295418003364563	0.114385278131018	0.0398147298446746
587	113	Junonia coenia_2D_180517	Junonia coenia	Junonia	Nymphalidae	17/05/18	Non-aposematic	NHM	NHM_3.3.9.9	yes		0.0401796558919604	0.114993653828563	0.0301145551180662
588	113	Junonia coenia_2V_180517	Junonia coenia	Junonia	Nymphalidae	17/05/18	Non-aposematic	NHM	NHM_3.3.9.9	yes		0.0263339377289035	0.114484835073756	0.0263897778602500
589	114	Marpesia chiron_1D_070917	Marpesia chiron	Marpesia	Nymphalidae	09/07/17	Non-aposematic	NHM	NHM_2.38.14.11	yes		0.0298982320557357	0.112152302983163	0.0247775977512708
590	114	Marpesia chiron_1V_070917	Marpesia chiron	Marpesia	Nymphalidae	09/07/17	Non-aposematic	NHM	NHM_2.38.14.11	yes		0.0217856230248573	0.118317247361772	0.0382265512522752
591	114	Marpesia chiron_2D_070917	Marpesia chiron	Marpesia	Nymphalidae	09/07/17	Non-aposematic	NHM	NHM_2.38.14.11	yes		0.0309799713119095	0.112145617815078	0.0222520872545491
592	114	Marpesia chiron_2V_070917	Marpesia chiron	Marpesia	Nymphalidae	09/07/17	Non-aposematic	NHM	NHM_2.38.14.11	yes		0.0196869010805701	0.118353677658480	0.0387460104624862
593	115	Marpesia norica_1D_070917	Marpesia norica	Marpesia	Nymphalidae	09/07/17	Non-aposematic	NHM	NHM_2.73.13.15	yes		0.0268183628621052	0.113317994211773	0.0228990152753797
594	115	Marpesia norica_1V_070917	Marpesia norica	Marpesia	Nymphalidae	09/07/17	Non-aposematic	NHM	NHM_2.73.13.15	yes		0.0199543641834826	0.113336628364068	0.0271524765963745
595	115	Marpesia norica_2D_070917	Marpesia norica	Marpesia	Nymphalidae	09/07/17	Non-aposematic	NHM	NHM_2.73.13.15	yes		0.0285386679976283	0.113845579229406	0.0239392164007487
596	115	Marpesia norica_2V_070917	Marpesia norica	Marpesia	Nymphalidae	09/07/17	Non-aposematic	NHM	NHM_2.73.13.15	yes		0.0178569540995771	0.113341725424784	0.0236394494269912
597	115	Marpesia norica_3D_070917	Marpesia norica	Marpesia	Nymphalidae	09/07/17	Non-aposematic	NHM	NHM_G.3.11.8	yes		0.0211365843944555	0.112673912105983	0.0304567851008618
598	115	Marpesia norica_3V_070917	Marpesia norica	Marpesia	Nymphalidae	09/07/17	Non-aposematic	NHM	NHM_G.3.11.8	yes		0.0154039251169155	0.112556113822479	0.0229659099265109
599	115	Marpesia norica_4D_070917	Marpesia norica	Marpesia	Nymphalidae	09/07/17	Non-aposematic	NHM	NHM_G.3.11.8	yes		0.0229333740750040	0.112203374878884	0.0381903933092349
600	115	Marpesia norica_4V_070917	Marpesia norica	Marpesia	Nymphalidae	09/07/17	Non-aposematic	NHM	NHM_G.3.11.8	yes		0.0170782555248073	0.111815381436134	0.0209241449873266
601	116	Oeneis jutta_1D_050917	Oeneis jutta	Oeneis	Nymphalidae	09/05/17	Non-aposematic	NHM	NHM_G.13.21.12	yes		0.0185257507769044	0.113498863421544	0.0172178221140172
602	116	Oeneis jutta_1V_050917	Oeneis jutta	Oeneis	Nymphalidae	09/05/17	Non-aposematic	NHM	NHM_G.13.21.12	yes		0.0205443798561289	0.114197103824044	0.0120045366296292
603	116	Oeneis jutta_2D_050917	Oeneis jutta	Oeneis	Nymphalidae	09/05/17	Non-aposematic	NHM	NHM_G.13.21.12	yes		0.0197876975666266	0.113313706122458	0.0119180063767413
604	116	Oeneis jutta_2V_050917	Oeneis jutta	Oeneis	Nymphalidae	09/05/17	Non-aposematic	NHM	NHM_G.13.21.12	yes		0.0221742832617136	0.114131845753129	0.0131352822416168
605	116	Oeneis jutta_3D_050917	Oeneis jutta	Oeneis	Nymphalidae	09/05/17	Non-aposematic	NHM	NHM_G.13.21.12	yes		0.0244140566700272	0.114332290383484	0.0138978132999904
606	116	Oeneis jutta_3V_050917	Oeneis jutta	Oeneis	Nymphalidae	09/05/17	Non-aposematic	NHM	NHM_G.13.21.12	yes		0.0240675014285953	0.114086726985252	0.0179021608843320
607	116	Oeneis jutta_4D_050917	Oeneis jutta	Oeneis	Nymphalidae	09/05/17	Non-aposematic	NHM	NHM_G.13.21.12	yes		0.0252504376718114	0.114358027194068	0.0173262786029893
608	116	Oeneis jutta_4V_050917	Oeneis jutta	Oeneis	Nymphalidae	09/05/17	Non-aposematic	NHM	NHM_G.13.21.12	yes		0.0249790903159055	0.112550454287324	0.0159294526444977
609	117	Ourapteryx sambucaria_1D_150517	Ourapteryx sambucaria	Ourapteryx	Geometridae	17/05/15	Non-aposematic	NHM	NHM_G.13.20.9	yes		0.0183075516434761	0.112853307400056	0.00756732838626787
610	117	Ourapteryx sambucaria_1V_150517	Ourapteryx sambucaria	Ourapteryx	Geometridae	17/05/15	Non-aposematic	NHM	NHM_G.13.20.9	yes		0.0184328062481939	0.114321740499583	0.00849468710320503
611	117	Ourapteryx sambucaria_2D_150517	Ourapteryx sambucaria	Ourapteryx	Geometridae	17/05/15	Non-aposematic	NHM	NHM_G.13.20.9	yes		0.0197637441151665	0.113745053907517	0.00831472757105603
612	117	Ourapteryx sambucaria_2V_150517	Ourapteryx sambucaria	Ourapteryx	Geometridae	17/05/15	Non-aposematic	NHM	NHM_G.13.20.9	yes		0.0201046967679854	0.116273536758187	0.00925340181197197
613	118	Peribatodes rhomboidaria_1D_070218	Peribatodes rhomboidaria	Peribatodes	Geometridae	02/07/18	Non-aposematic	Manchester		yes		0.0267821126473006	0.111847704777636	0.0152723251867128
614	118	Peribatodes rhomboidaria_1V_070218	Peribatodes rhomboidaria	Peribatodes	Geometridae	02/07/18	Non-aposematic	Manchester		yes		0.0209472594406595	0.113558463190653	0.0184097913623279
615	118	Peribatodes rhomboidaria_2D_070218	Peribatodes rhomboidaria	Peribatodes	Geometridae	02/07/18	Non-aposematic	Manchester		yes		0.0221069916815043	0.111718643959576	0.0139232555219190
616	118	Peribatodes rhomboidaria_2V_070218	Peribatodes rhomboidaria	Peribatodes	Geometridae	02/07/18	Non-aposematic	Manchester		yes		0.0199524003085714	0.113327353416029	0.0164042724796798
617	119	Pero ancetaria_1D_070218	Pero ancetaria	Pero	Geometridae	02/07/18	Non-aposematic	AMNH		yes		0.0222025148628457	0.112054898971996	0.0269847485298385
618	119	Pero ancetaria_1V_070218	Pero ancetaria	Pero	Geometridae	02/07/18	Non-aposematic	AMNH		yes		0.0212445594303765	0.112399422203353	0.0180069728618586
619	120	Phoebis argante_1D_07092017	Phoebis argante	Phoebis	Pieridae	09/07/20	Non-aposematic	NHM	NHM_G.31.11.1	yes		0.0123016145505970	0.114971276835898	0.0650240903068677
620	120	Phoebis argante_1V_07092017	Phoebis argante	Phoebis	Pieridae	09/07/20	Non-aposematic	NHM	NHM_G.31.11.1	yes		0.0183549013804083	0.116346213880464	0.0334570176293945
621	120	Phoebis argante_2D_07092017	Phoebis argante	Phoebis	Pieridae	09/07/20	Non-aposematic	NHM	NHM_G.31.11.1	yes		0.0123311433901696	0.115882955157378	0.0533753092264613
622	120	Phoebis argante_2V_07092017	Phoebis argante	Phoebis	Pieridae	09/07/20	Non-aposematic	NHM	NHM_G.31.11.1	yes		0.0225064383483378	0.116321730475755	0.0341208288175632
623	120	Phoebis argante_3D_07092017	Phoebis argante	Phoebis	Pieridae	09/07/20	Non-aposematic	NHM	NHM_G.31.11.1	yes		0.0167354656504849	0.113327176446232	0.0391498744862407
624	120	Phoebis argante_3V_07092017	Phoebis argante	Phoebis	Pieridae	09/07/20	Non-aposematic	NHM	NHM_G.31.11.1	yes		0.0200141608983060	0.112109880890651	0.0243495482803221
625	120	Phoebis argante_4D_07092017	Phoebis argante	Phoebis	Pieridae	09/07/20	Non-aposematic	NHM	NHM_G.31.11.1	yes		0.0188628709590141	0.114321581356549	0.0598240125476739
626	120	Phoebis argante_4V_07092017	Phoebis argante	Phoebis	Pieridae	09/07/20	Non-aposematic	NHM	NHM_G.31.11.1	yes		0.0236909993583470	0.112857613413288	0.0294194434497473
627	121	Pierella luna lesbia_1D_050917	Pierella luna	Pierella	Nymphalidae	09/05/17	Non-aposematic	NHM	NHM_G.42.14.15	yes		0.0196935466263328	0.113382473045920	0.0739709298686787
628	121	Pierella luna lesbia_1V_050917	Pierella luna	Pierella	Nymphalidae	09/05/17	Non-aposematic	NHM	NHM_G.42.14.15	yes		0.0228465306989820	0.113456375782489	0.0167076414715976
629	121	Pierella luna lesbia_2D_050917	Pierella luna	Pierella	Nymphalidae	09/05/17	Non-aposematic	NHM	NHM_G.42.14.15	yes		0.0218956510305910	0.113735664595036	0.0805842993491038
630	121	Pierella luna lesbia_2V_050917	Pierella luna	Pierella	Nymphalidae	09/05/17	Non-aposematic	NHM	NHM_G.42.14.15	yes		0.0244715396238224	0.113565062301846	0.0216122500212763
631	121	Pierella luna luna_1D_050917	Pierella luna	Pierella	Nymphalidae	09/05/17	Non-aposematic	NHM	NHM_G.42.14.15	yes		0.0212176261309817	0.114915149289893	0.0192482583438752
632	121	Pierella luna luna_1V_050917	Pierella luna	Pierella	Nymphalidae	09/05/17	Non-aposematic	NHM	NHM_G.42.14.15	yes		0.0250776569866809	0.113455236379982	0.0160033917493581
633	121	Pierella luna luna_2D_050917	Pierella luna	Pierella	Nymphalidae	09/05/17	Non-aposematic	NHM	NHM_G.25.1.12	yes		0.0206011381094448	0.114667504140240	0.0152079965513301
634	121	Pierella luna luna_2V_050917	Pierella luna	Pierella	Nymphalidae	09/05/17	Non-aposematic	NHM	NHM_G.25.1.12	yes		0.0217782285082693	0.112992284122492	0.0198017137664081
635	122	Sphacelodes vulneraria_1D_040917	Sphacelodes vulneraria	Sphacelodes	Geometridae	09/04/17	Non-aposematic	NHM	NHM_G.70.4.10	yes		0.0233346280878468	0.114820626560594	0.0171717840348053
636	122	Sphacelodes vulneraria_1V_040917	Sphacelodes vulneraria	Sphacelodes	Geometridae	09/04/17	Non-aposematic	NHM	NHM_G.70.4.10	yes		0.0219289322964756	0.115273325982038	0.0136357180698162
637	122	Sphacelodes vulneraria_2D_040917	Sphacelodes vulneraria	Sphacelodes	Geometridae	09/04/17	Non-aposematic	NHM	NHM_G.70.4.10	yes		0.0230962003262202	0.114764747876902	0.0190243316412777
638	122	Sphacelodes vulneraria_2V_040917	Sphacelodes vulneraria	Sphacelodes	Geometridae	09/04/17	Non-aposematic	NHM	NHM_G.70.4.10	yes		0.0235692553792568	0.115319937776321	0.0165584322233805
639	122	Sphacelodes vulneraria_3D_040917	Sphacelodes vulneraria	Sphacelodes	Geometridae	09/04/17	Non-aposematic	NHM	NHM_G.60.2.4	yes		0.0244888690171043	0.112222742164271	0.0193779889710350
640	122	Sphacelodes vulneraria_3V_040917	Sphacelodes vulneraria	Sphacelodes	Geometridae	09/04/17	Non-aposematic	NHM	NHM_G.60.2.4	yes		0.0267785070798519	0.114126479277514	0.0144127767580519
641	122	Sphacelodes vulneraria_4D_040917	Sphacelodes vulneraria	Sphacelodes	Geometridae	09/04/17	Non-aposematic	NHM	NHM_G.60.2.4	yes		0.0206712983469325	0.112762956276766	0.0247794770036453
642	122	Sphacelodes vulneraria_4V_040917	Sphacelodes vulneraria	Sphacelodes	Geometridae	09/04/17	Non-aposematic	NHM	NHM_G.60.2.4	yes		0.0221263097793725	0.115410240237852	0.0160075596026083
643	123	Temenis laothoe_1D_060917	Temenis laothoe	Temenis	Nymphalidae	09/06/17	Non-aposematic	NHM	NHM_G.57.7.1	yes		0.0168242192177501	0.114707559373754	0.0645887500869085
644	123	Temenis laothoe_1V_060917	Temenis laothoe	Temenis	Nymphalidae	09/06/17	Non-aposematic	NHM	NHM_G.57.7.1	yes		0.0167722967491023	0.114950012429054	0.0463111870265225
645	123	Temenis laothoe_2D_060917	Temenis laothoe	Temenis	Nymphalidae	09/06/17	Non-aposematic	NHM	NHM_G.57.7.1	yes		0.0167429561843255	0.113962389314231	0.0619092707499966
646	123	Temenis laothoe_2V_060917	Temenis laothoe	Temenis	Nymphalidae	09/06/17	Non-aposematic	NHM	NHM_G.57.7.1	yes		0.0168976129415457	0.114422150822080	0.0294986835452421
647	123	Temenis laothoe_3D_060917	Temenis laothoe	Temenis	Nymphalidae	09/06/17	Non-aposematic	NHM	NHM_G.57.7.1	yes		0.0149889512699758	0.114128855660143	0.0452776932721350
648	123	Temenis laothoe_3V_060917	Temenis laothoe	Temenis	Nymphalidae	09/06/17	Non-aposematic	NHM	NHM_G.57.7.1	yes		0.0151157614731066	0.116498740680834	0.0330493073861658
649	123	Temenis laothoe_4D_060917	Temenis laothoe	Temenis	Nymphalidae	09/06/17	Non-aposematic	NHM	NHM_G.57.7.1	yes		0.0137539600052307	0.116518727655348	0.0389676857799511
650	123	Temenis laothoe_4V_060917	Temenis laothoe	Temenis	Nymphalidae	09/06/17	Non-aposematic	NHM	NHM_G.57.7.1	yes		0.0145169407496865	0.115265453390585	0.0357619326399916
651	124	Thera obeliscata_1D_160517	Thera obeliscata	Thera	Geometridae	17/05/16	Non-aposematic	NHM	NHM_G.50.6.5	yes		0.0220108875422854	0.112370148871441	0.0168583350188269
652	124	Thera obeliscata_1V_160517	Thera obeliscata	Thera	Geometridae	17/05/16	Non-aposematic	NHM	NHM_G.50.6.5	yes		0.0212001796082114	0.112446152688180	0.00995095758913905
653	124	Thera obeliscata_2D_160517	Thera obeliscata	Thera	Geometridae	17/05/16	Non-aposematic	NHM	NHM_G.50.6.5	no	ventral side missing	0.0206180591395323	0.111288965631024	0.0124866581835279
654	124	Thera obeliscata_2V_160517	Thera obeliscata	Thera	Geometridae	17/05/16	Non-aposematic	NHM	NHM_G.50.6.5	n/a	n/a	NaN	NaN	NaN
655	125	Zaretis ellops_1D_070917	Zaretis ellops	Zaretis	Nymphalidae	09/07/17	Non-aposematic	NHM	NHM.G.19.6.1	yes		0.0159153136371279	0.113279417460894	0.0639673485795624
656	125	Zaretis ellops_1V_070917	Zaretis ellops	Zaretis	Nymphalidae	09/07/17	Non-aposematic	NHM	NHM.G.19.6.1	yes		0.0196711738117442	0.112041534936128	0.0227173930038395
657	125	Zaretis ellops_2D_070917	Zaretis ellops	Zaretis	Nymphalidae	09/07/17	Non-aposematic	NHM	NHM.G.19.6.1	yes		0.0175191202392077	0.114581232981015	0.0610628061535429
658	125	Zaretis ellops_2V_070917	Zaretis ellops	Zaretis	Nymphalidae	09/07/17	Non-aposematic	NHM	NHM.G.19.6.1	yes		0.0205723896536204	0.112172525003936	0.0255109070372070
659	125	Zaretis ellops_3D_070917	Zaretis ellops	Zaretis	Nymphalidae	09/07/17	Non-aposematic	NHM	NHM.3rd.132.15.2	yes		0.0186363917414289	0.115453598032963	0.0475956329604657
660	125	Zaretis ellops_3V_070917	Zaretis ellops	Zaretis	Nymphalidae	09/07/17	Non-aposematic	NHM	NHM.3rd.132.15.2	yes		0.0199716929483179	0.114923196356003	0.0197698315544249
661	125	Zaretis ellops_4D_070917	Zaretis ellops	Zaretis	Nymphalidae	09/07/17	Non-aposematic	NHM	NHM.3rd.132.15.2	yes		0.0175342780631070	0.114356835782448	0.0426283481916900
662	125	Zaretis ellops_4V_070917	Zaretis ellops	Zaretis	Nymphalidae	09/07/17	Non-aposematic	NHM	NHM.3rd.132.15.2	yes		0.0184575658513552	0.115448118786187	0.0241351916836444
