# Supplementary material for: Understanding the design of warning signals: a predator’s view
Source: Research Square preprint supplement (doi:10.21203/rs.3.rs-777244/v1), 2021-08-13
Supplement: Supplementary file 3 [file c90fc987610038a4728f5110.xlsx]

## Sheet: Sheet1
Species number	Luminance energy	Isotropy departure	Colour energy	scinvL1	scinvL2	max2_5	max10	kurtosis	rms	ELplusMS_std	ESU_std	GiniL_M	GiniLM_S	GiniS_U
1	0.0257013	0.115117	0.0223261	0.0261477	0.000397174	0.111746	0.072749	16.1104	7.04517e-14	0.0551089	0.00436778	0.180694	0.343455	0.497627
1	0.0247646	0.116567	0.0119535	0.0237291	0.000376351	0.107869	0.0669536	20.7898	4.29576e-14	0.033834	0.00487471	0.0990335	0.25463	0.508439
1	0.0263894	0.117078	0.0259699	0.021851	0.000276271	0.116051	0.0723885	17.2022	9.02887e-14	0.0640678	0.00526717	0.172764	0.36453	0.604215
1	0.0254678	0.117235	0.0134159	0.0227246	0.000278402	0.110325	0.0681801	17.8723	9.93639e-14	0.0401005	0.00625597	0.107845	0.278534	0.530295
2	0.0424672	0.116664	0.0377609	0.0461623	0.000482743	0.176408	0.130697	5.79363	1.91223e-13	0.070922	0.0213769	0.180282	0.244857	0.638256
2	0.0383748	0.117233	0.0327731	0.0411905	0.000442073	0.159666	0.117642	6.31676	6.65187e-14	0.0592603	0.0107947	0.160224	0.211722	0.621689
2	0.0466962	0.117857	0.0415101	0.0493427	0.000549367	0.193498	0.1422	6.37575	9.58476e-14	0.086357	0.018932	0.186376	0.259192	0.649834
2	0.0403434	0.117122	0.0367539	0.041576	0.000472348	0.165986	0.122555	6.09789	2.18472e-13	0.0704217	0.0103669	0.160866	0.20134	0.686366
3	0.0189198	0.111789	0.0335768	0.019994	0.000250802	0.0835408	0.0565462	9.89038	3.53336e-14	0.0693266	0.0120326	0.182611	0.338262	0.179809
3	0.0204419	0.112345	0.0233386	0.0214341	0.00026867	0.0873402	0.0580077	17.4077	7.50164e-14	0.0463748	0.0101886	0.155295	0.289051	0.2189
4	0.0243897	0.117067	0.0263545	0.0207046	0.000247987	0.104839	0.0662451	20.4773	1.18796e-13	0.070137	0.00573739	0.161595	0.365343	0.555991
4	0.0244663	0.11804	0.0139612	0.0222393	0.000254237	0.103997	0.0655274	19.4747	8.46426e-14	0.0432775	0.00613523	0.10572	0.279448	0.504981
4	0.0269138	0.117342	0.0263732	0.0234714	0.00027028	0.119113	0.0763989	13.101	1.4748e-13	0.0673902	0.00511474	0.151463	0.343962	0.545057
4	0.0257632	0.117469	0.0174956	0.0256886	0.000271211	0.110683	0.0760749	9.28119	1.58069e-13	0.0509116	0.00644494	0.112004	0.273346	0.420495
5	0.0274844	0.116503	0.0219611	0.0270097	0.000360084	0.119977	0.079626	11.8505	6.65005e-14	0.0597862	0.00426266	0.147122	0.336462	0.543324
5	0.0274379	0.115383	0.0142177	0.0286014	0.000376451	0.119095	0.0808823	9.87322	7.9274e-14	0.0413548	0.00535963	0.111839	0.27242	0.497241
5	0.0275102	0.116772	0.0193451	0.0239688	0.000336726	0.112584	0.0727279	33.7619	6.39166e-14	0.0523366	0.00558387	0.165564	0.345657	0.616066
5	0.0288274	0.115801	0.0179211	0.0270991	0.000367883	0.115434	0.0783453	33.7178	3.72181e-14	0.0435436	0.00543675	0.178487	0.320208	0.458687
6	0.0297176	0.1212	0.0488669	0.026305	0.000241224	0.13173	0.0891079	8.99383	6.10208e-14	0.13277	0.0193856	0.178669	0.255359	0.746221
6	0.0302489	0.124162	0.0178134	0.0277043	0.00024986	0.130999	0.0912949	9.41193	1.10459e-13	0.0422517	0.00773229	0.0925686	0.131882	0.576722
6	0.03296	0.11905	0.0429742	0.0297295	0.000234878	0.146153	0.0982032	9.47295	1.18396e-13	0.129398	0.0122927	0.179281	0.284177	0.657872
6	0.0318649	0.119256	0.0171193	0.0303737	0.000233992	0.140534	0.0975007	8.25613	1.23452e-13	0.0431386	0.0069355	0.0974564	0.15532	0.652394
7	0.040087	0.116791	0.0580175	0.0339143	0.000260142	0.180304	0.117341	10.2257	3.06366e-13	0.129741	0.0209228	0.207802	0.258665	0.695898
7	0.0442845	0.116609	0.0576216	0.0393866	0.000292428	0.196042	0.131968	9.42327	3.36938e-13	0.126864	0.0186066	0.281582	0.38423	0.642032
7	0.0366222	0.115991	0.0543579	0.0315302	0.000230761	0.166084	0.107537	10.3826	1.4351e-13	0.118777	0.0208867	0.190585	0.229839	0.666285
7	0.0437527	0.116524	0.0607232	0.0389718	0.000280497	0.1937	0.130368	9.53719	2.07178e-13	0.134292	0.0178629	0.297909	0.404592	0.632038
8	0.033888	0.116502	0.0323879	0.0309445	0.000586128	0.149081	0.102986	10.1344	4.15414e-14	0.0352079	0.026933	0.133855	0.0998366	0.479138
8	0.027764	0.115988	0.0240875	0.0246599	0.000460991	0.126891	0.0798916	12.2499	4.31401e-14	0.0314805	0.0124445	0.111097	0.102961	0.444088
9	0.0385966	0.115775	0.0893862	0.0373382	0.000327459	0.168142	0.117205	7.40468	2.90536e-13	0.184446	0.00953985	0.295128	0.368843	0.550179
9	0.0366302	0.113711	0.0217727	0.0388463	0.000325055	0.156349	0.112211	6.38786	2.71681e-13	0.0477354	0.0200962	0.12579	0.181279	0.62745
9	0.0373336	0.11519	0.0868293	0.0354252	0.000314132	0.163292	0.114386	7.43016	3.80766e-13	0.168535	0.0125596	0.289413	0.354371	0.631812
9	0.0346349	0.114289	0.022905	0.0357737	0.00031482	0.150671	0.104811	8.46908	1.76417e-13	0.0485299	0.0214549	0.121621	0.163297	0.548386
10	0.0376046	0.123235	0.0618738	0.0286543	0.000229255	0.168177	0.108126	10.9244	4.00283e-13	0.15176	0.00948473	0.119811	0.134138	0.435437
10	0.0502328	0.126711	0.0542087	0.0445266	0.000326213	0.21781	0.151841	7.60103	4.03958e-13	0.141812	0.0367461	0.20904	0.273681	0.529523
10	0.0293184	0.118608	0.0712043	0.023528	0.000169537	0.132018	0.0854153	10.5035	5.50428e-13	0.166096	0.00682999	0.146589	0.162823	0.463448
10	0.0370963	0.12409	0.0554867	0.0312265	0.000218764	0.162174	0.108054	11.3304	2.2924e-13	0.143151	0.0148399	0.209263	0.282501	0.421498
11	0.0443684	0.121229	0.0348226	0.0319088	0.000233091	0.199924	0.130759	11.4419	2.52245e-13	0.0535738	0.0350996	0.13149	0.112306	0.736043
11	0.0433437	0.124275	0.0318227	0.0336597	0.00023602	0.187173	0.126993	9.71562	4.51575e-13	0.0597991	0.0258483	0.147352	0.1526	0.603071
11	0.0391048	0.11885	0.0414942	0.0331101	0.000221419	0.177084	0.117055	10.3966	3.52346e-13	0.0663526	0.0213121	0.154779	0.155259	0.676259
11	0.0378861	0.120595	0.0351323	0.0315792	0.000217405	0.16653	0.110166	11.678	4.42941e-13	0.0687412	0.0156965	0.164918	0.192691	0.541431
12	0.0433693	0.120231	0.0420826	0.0337311	0.000207094	0.197655	0.126986	11.3406	1.22708e-13	0.0665474	0.00715339	0.283626	0.403954	0.476018
12	0.0420663	0.121968	0.0412736	0.0349544	0.000208428	0.189969	0.125902	9.97836	4.2753e-13	0.0697549	0.00438914	0.325438	0.474986	0.555063
12	0.0414941	0.11942	0.0389545	0.0294753	0.000183398	0.190964	0.118555	13.1278	6.05049e-13	0.0609083	0.00769119	0.283607	0.392509	0.537574
12	0.0418102	0.122388	0.0381938	0.0313995	0.000190304	0.192036	0.121156	12.1298	2.06606e-13	0.0608085	0.00444611	0.335537	0.440027	0.724095
13	0.0444702	0.12046	0.0550215	0.0391139	0.000340808	0.195982	0.134225	8.50046	3.58041e-13	0.118473	0.0138878	0.208427	0.255486	0.434824
13	0.0349402	0.11718	0.0506258	0.0330503	0.000274155	0.153091	0.106226	8.37797	1.94601e-13	0.0900953	0.0112924	0.182408	0.187303	0.335067
13	0.0457188	0.119574	0.0666654	0.0381392	0.000322655	0.199681	0.134525	10.7173	2.92187e-13	0.109561	0.00847516	0.213433	0.221845	0.499472
13	0.0376698	0.118108	0.0444063	0.0336562	0.000274139	0.163255	0.111499	10.7407	3.51099e-13	0.0755452	0.00805643	0.17374	0.181761	0.296875
14	0.0478092	0.12165	0.0450867	0.0431048	0.000423277	0.206201	0.145411	6.52126	2.96487e-13	0.12772	0.0291645	0.188501	0.275643	0.512994
14	0.037443	0.119197	0.0763512	0.0364258	0.000338883	0.161386	0.113515	6.21061	1.04837e-13	0.103191	0.0180228	0.238965	0.218594	0.488155
14	0.0488558	0.122182	0.0610881	0.0413057	0.000381813	0.214443	0.145218	8.01942	2.20291e-13	0.139327	0.0357004	0.226514	0.270946	0.494957
14	0.0385101	0.119724	0.0817705	0.0344003	0.000310095	0.170312	0.112655	8.86322	3.48558e-13	0.111696	0.0252674	0.246324	0.217408	0.466299
14	0.0489506	0.121016	0.0499514	0.0459058	0.00053848	0.207136	0.150178	6.37396	6.58896e-14	0.120058	0.0338377	0.150312	0.218671	0.583621
14	0.0371079	0.117881	0.0820784	0.0343146	0.000405709	0.161718	0.110837	8.26438	1.25064e-13	0.100381	0.0277529	0.194631	0.174148	0.685942
14	0.0478325	0.120096	0.0613384	0.0429864	0.000417907	0.203661	0.144922	6.88922	2.65487e-13	0.148939	0.0351472	0.160191	0.233011	0.527279
14	0.0371538	0.118509	0.0749391	0.0343276	0.000334521	0.163239	0.110814	8.27705	1.05908e-13	0.119085	0.029931	0.169346	0.191261	0.599561
15	0.0274633	0.117345	0.0302692	0.0300589	0.000356758	0.119315	0.0846554	6.87518	5.95952e-14	0.0974243	0.00679636	0.0892678	0.158948	0.712368
15	0.0317692	0.116097	0.0197662	0.0367252	0.000430026	0.132603	0.0992646	5.27699	8.911e-14	0.0691784	0.00670029	0.058906	0.115795	0.702173
15	0.0288902	0.116265	0.0226676	0.0327743	0.000440164	0.124977	0.088739	6.74702	4.70338e-14	0.0775078	0.00590821	0.0682114	0.130146	0.664631
15	0.0334213	0.115578	0.0216557	0.0395901	0.000527106	0.139352	0.10496	4.79271	6.51424e-14	0.0646369	0.00534304	0.0682826	0.116038	0.624961
16	0.0330642	0.116935	0.0230502	0.0347081	0.000324832	0.140106	0.0972833	9.95077	3.06361e-13	0.0662989	0.0023931	0.161669	0.272415	0.46129
16	0.027365	0.115595	0.0201352	0.0280407	0.000266802	0.118337	0.0812735	10.8411	1.9256e-13	0.0629674	0.00289751	0.140638	0.249575	0.358998
16	0.0292331	0.116465	0.0198557	0.0309835	0.000292664	0.124398	0.0876645	8.06781	1.71785e-13	0.0532504	0.0033069	0.154525	0.254646	0.40482
16	0.0241621	0.115658	0.0192601	0.0254295	0.000240929	0.103428	0.0721845	9.08996	5.24709e-14	0.0516172	0.00419535	0.137188	0.2157	0.384505
17	0.0369739	0.113828	0.0230988	0.0436327	0.000524025	0.156545	0.114006	8.70667	5.66007e-14	0.072361	0.0045695	0.142462	0.241148	0.251672
17	0.0317813	0.113509	0.0122507	0.0368174	0.000438811	0.137405	0.0971949	9.4542	8.44227e-14	0.043001	0.00562904	0.0727472	0.135893	0.242329
17	0.0382196	0.115723	0.0251279	0.0447605	0.000511417	0.16303	0.118523	7.78586	9.96057e-14	0.0895116	0.00663999	0.156092	0.283212	0.300829
17	0.03728	0.115311	0.0147919	0.0435209	0.000503975	0.160425	0.115119	8.86096	1.15688e-13	0.0578045	0.00780814	0.087446	0.162044	0.280964
17	0.0425022	0.115048	0.0232876	0.0509358	0.000581116	0.182424	0.133584	5.76684	1.05731e-13	0.0616078	0.00330154	0.123407	0.195992	0.5456
17	0.034226	0.114045	0.0180713	0.0418923	0.000461083	0.145881	0.108118	5.52047	9.90045e-14	0.0555095	0.00408938	0.0852741	0.156229	0.564375
18	0.0237083	0.11245	0.0526517	0.0213443	0.000215205	0.109029	0.0675503	13.5104	5.60143e-14	0.0896205	0.013641	0.269702	0.275133	0.501709
18	0.0222151	0.112285	0.0291797	0.0197663	0.000196342	0.103546	0.061772	15.5642	1.59883e-13	0.0631796	0.00839731	0.135075	0.167781	0.282858
18	0.0266844	0.114807	0.0460935	0.0235623	0.000228807	0.120745	0.0723351	20.1999	1.38071e-13	0.0760088	0.0143789	0.250369	0.246223	0.389445
18	0.0291285	0.115641	0.0308411	0.0236979	0.000238291	0.13489	0.0775579	21.8084	1.5341e-13	0.0706218	0.0116346	0.147523	0.192693	0.287519
19	0.0389312	0.11643	0.0157645	0.0355633	0.000209375	0.174915	0.115511	9.74546	4.28283e-13	0.0374176	0.0383859	0.100303	0.163694	0.775879
19	0.0423097	0.117481	0.0212233	0.039324	0.000230268	0.18701	0.127615	9.13791	3.71376e-13	0.0413237	0.0214804	0.109382	0.142055	0.669673
19	0.035988	0.116405	0.0155116	0.0299013	0.000178802	0.164905	0.104034	11.8711	4.03888e-13	0.0311452	0.0267329	0.0973751	0.141469	0.786005
19	0.0426364	0.118679	0.0291491	0.0376875	0.00021574	0.192701	0.126143	9.37137	3.83006e-13	0.0663208	0.0158181	0.139258	0.194221	0.583242
20	0.0316258	0.116742	0.0194461	0.0279163	0.000149942	0.144909	0.0909143	13.2357	3.13491e-13	0.0327041	0.0531556	0.167483	0.13289	0.575576
20	0.0348394	0.123084	0.0368917	0.0258346	0.000153703	0.159855	0.0994369	13.6124	7.51198e-13	0.0668532	0.00857916	0.141986	0.184566	0.470668
20	0.0296735	0.11531	0.0175606	0.0253848	0.000138748	0.13512	0.0834674	15.9958	7.35039e-13	0.0379322	0.0424086	0.138719	0.144946	0.541154
20	0.0330933	0.120297	0.0376297	0.0271161	0.000150881	0.149394	0.0960034	13.0589	3.87235e-13	0.067054	0.0107036	0.152665	0.188977	0.44901
21	0.0329577	0.115719	0.0304978	0.0243069	0.000135896	0.155517	0.0854222	21.4461	2.28733e-13	0.0549454	0.0419316	0.238894	0.260593	0.666636
21	0.0371712	0.11876	0.0368235	0.0299465	0.000160577	0.168273	0.107737	11.4358	8.10262e-13	0.0595173	0.0201051	0.161623	0.185189	0.495752
21	0.0378562	0.116422	0.0237827	0.0315843	0.000145701	0.175428	0.102611	19.0542	6.68579e-13	0.0454014	0.0503837	0.254014	0.2874	0.680912
21	0.036909	0.117579	0.033155	0.0298904	0.000141768	0.166955	0.10675	13.1022	7.39304e-13	0.0541678	0.0124193	0.174309	0.214695	0.457544
22	0.0236929	0.114537	0.0226857	0.0168597	0.000136152	0.109706	0.0585885	30.5503	2.41913e-13	0.0309897	0.00235981	0.230512	0.278562	0.638776
22	0.0370655	0.119648	0.0397007	0.0298946	0.000195254	0.166171	0.108338	10.1527	4.72099e-13	0.0920356	0.0109109	0.222615	0.330357	0.707791
22	0.0269369	0.115442	0.0255285	0.0218127	0.000149166	0.122985	0.0752821	17.1413	1.72871e-13	0.0322177	0.0168171	0.213077	0.204875	0.522642
22	0.0359277	0.118382	0.0489094	0.0281807	0.000171936	0.160609	0.10487	10.4676	3.28613e-13	0.105303	0.0145913	0.264815	0.357857	0.586076
23	0.0382676	0.117715	0.0170986	0.029295	0.000167639	0.174833	0.108557	13.2703	9.48083e-13	0.0387883	0.0645605	0.0980045	0.12148	0.806614
23	0.0372536	0.120451	0.0318129	0.0284138	0.000163504	0.167991	0.106774	12.1908	8.68565e-13	0.0398589	0.0168607	0.118092	0.112234	0.758366
23	0.0374587	0.118162	0.0142994	0.0305424	0.000189723	0.167679	0.109556	10.8406	3.2952e-13	0.0366405	0.0469181	0.0782451	0.109858	0.798383
23	0.0352801	0.119077	0.0291687	0.0281724	0.000177051	0.157039	0.10229	11.2606	1.40817e-13	0.0471268	0.0145946	0.122449	0.143051	0.681176
24	0.0316194	0.116778	0.0894808	0.0288638	0.000195333	0.143478	0.0912791	13.1551	3.03671e-13	0.116844	0.0111902	0.198075	0.202117	0.48163
24	0.0240801	0.115457	0.0368856	0.0216172	0.000148367	0.109788	0.0699252	12.8487	2.24807e-13	0.0432573	0.00799243	0.0960927	0.0866284	0.511729
24	0.0311585	0.115912	0.061739	0.0266012	0.00017733	0.146435	0.0889719	14.3691	3.73208e-13	0.101712	0.00889867	0.156385	0.178166	0.518247
24	0.0293746	0.116552	0.0265808	0.0222036	0.000158621	0.138632	0.080298	18.4438	2.55485e-13	0.0396516	0.00686844	0.0756328	0.0803552	0.556187
25	0.0200824	0.114666	0.0812004	0.014391	5.08742e-05	0.0918058	0.0495449	33.2541	1.03974e-12	0.143355	0.0622337	0.335357	0.538286	0.383929
25	0.0402998	0.113061	0.0411552	0.0408029	0.000121044	0.177257	0.121899	9.22181	2.03066e-12	0.0825809	0.0238928	0.161678	0.221073	0.581417
26	0.0378361	0.117498	0.205546	0.0314754	0.000290935	0.169174	0.109508	11.9414	1.73169e-13	0.256541	0.131923	0.353344	0.379317	0.357279
26	0.0592438	0.119012	0.0968441	0.057209	0.000490091	0.246548	0.179932	7.53494	4.62933e-13	0.138134	0.0412631	0.343164	0.348148	0.612615
26	0.0320961	0.115102	0.137447	0.030134	0.000260205	0.144169	0.0942555	11.2891	3.17647e-13	0.214871	0.174968	0.30838	0.448814	0.365765
26	0.0579978	0.117182	0.0934961	0.0563768	0.000481319	0.247505	0.176211	7.42978	2.54103e-13	0.111009	0.0233518	0.292553	0.28389	0.604395
26	0.0313551	0.116531	0.0434638	0.0259242	0.000256929	0.14078	0.0899019	13.0521	5.67773e-14	0.150193	0.0133197	0.139928	0.251968	0.590757
26	0.0623153	0.118816	0.0382921	0.0556183	0.000528621	0.265631	0.186066	7.79051	3.41566e-13	0.111222	0.0210818	0.158893	0.246136	0.57598
26	0.0290499	0.117663	0.0496182	0.023856	0.000227452	0.129428	0.0829981	13.8088	1.81666e-13	0.165181	0.0132267	0.149442	0.256948	0.544277
26	0.060122	0.117984	0.0371008	0.0534108	0.000484959	0.254415	0.179806	7.48959	2.50227e-13	0.112042	0.0224377	0.160366	0.254425	0.604392
26	0.0335801	0.116902	0.10651	0.0236552	0.000207925	0.153543	0.0874683	23.4565	2.49257e-13	0.189115	0.0154772	0.251011	0.276909	0.705822
26	0.0610013	0.118583	0.0855347	0.0501691	0.00039112	0.257895	0.179215	8.86724	4.65116e-13	0.155851	0.0343038	0.280235	0.320408	0.653274
26	0.0337742	0.118631	0.0849408	0.0239338	0.00021179	0.154248	0.088882	24.8026	3.775e-13	0.193404	0.0166837	0.219916	0.290338	0.671212
26	0.056343	0.118358	0.0630689	0.0496171	0.000384998	0.23448	0.169866	6.83509	4.53359e-13	0.14542	0.0273062	0.24233	0.3168	0.657245
27	0.0328928	0.117027	0.0413106	0.021739	0.000216077	0.141645	0.089466	14.9891	1.44257e-13	0.121385	0.0396366	0.198512	0.244886	0.502213
27	0.0190026	0.117222	0.012675	0.00730068	0.000112549	0.0908352	0.0378492	44.3996	7.91311e-14	0.0588882	0.0246754	0.0822228	0.175194	0.183766
27	0.0282588	0.116797	0.0403065	0.016475	0.000197531	0.127641	0.0750547	18.3258	5.29199e-14	0.123385	0.032161	0.220143	0.290615	0.60416
27	0.018731	0.117439	0.00850221	0.00672648	0.00011995	0.0880116	0.0356439	52.4846	3.07907e-14	0.0471618	0.023612	0.0424535	0.203318	0.184401
27	0.0272378	0.114412	0.0409475	0.0208524	0.000221547	0.121159	0.0786748	13.2321	1.39121e-13	0.0990302	0.0323223	0.163791	0.186708	0.553579
27	0.0156933	0.114846	0.0220294	0.0117154	0.000127705	0.0727421	0.0426439	18.5269	2.34709e-14	0.0599821	0.0195014	0.103567	0.153658	0.627388
27	0.0282842	0.119656	0.107608	0.0190633	0.000198406	0.128646	0.0762047	17.0293	8.84059e-14	0.229539	0.0657841	0.235688	0.259769	0.553373
27	0.017554	0.116848	0.0238372	0.0126673	0.000125849	0.0810741	0.048631	14.7006	8.77699e-14	0.0722452	0.0130575	0.0705913	0.0786398	0.317767
27	0.0313345	0.115165	0.064419	0.0255237	0.000236527	0.139478	0.0904532	11.3964	1.49143e-13	0.14039	0.0218794	0.170171	0.19993	0.621742
27	0.0154143	0.11421	0.0286916	0.0114268	0.000113974	0.0731867	0.0415451	19.7932	5.56753e-14	0.0657063	0.00591662	0.0829238	0.0844057	0.539984
28	0.0523008	0.11907	0.0407881	0.0432239	0.000429196	0.216044	0.159572	6.77094	3.26824e-13	0.0450301	0.010463	0.225554	0.339435	0.754817
28	0.0490544	0.11965	0.0536999	0.0457442	0.000416158	0.204368	0.15103	5.9837	2.51332e-13	0.0593353	0.0137903	0.284932	0.365643	0.718308
28	0.0520038	0.119527	0.042576	0.0459529	0.000434207	0.215492	0.158544	6.47729	2.03035e-13	0.0445863	0.00960619	0.293063	0.376646	0.743056
28	0.0519706	0.118899	0.0570869	0.0476951	0.000446928	0.215977	0.158377	6.04966	2.88604e-13	0.0631811	0.0117527	0.310238	0.392401	0.658997
29	0.0541959	0.116711	0.101473	0.0502871	0.00118359	0.244869	0.158503	10.2134	7.58752e-14	0.129043	0.0050561	0.404066	0.468628	0.550773
29	0.0524104	0.113437	0.0833474	0.047647	0.00112654	0.239782	0.150217	12.1659	4.23104e-14	0.113691	0.00525838	0.34247	0.408841	0.553514
29	0.0515875	0.118337	0.0935501	0.0477706	0.00114633	0.235972	0.151982	10.0666	3.4514e-14	0.113883	0.00597677	0.391228	0.465065	0.513058
29	0.052808	0.118665	0.0882023	0.0494473	0.00107758	0.239574	0.153646	11.2344	2.42258e-14	0.118602	0.00818773	0.374779	0.448508	0.581208
30	0.0177567	0.114325	0.0142933	0.0140611	0.00023765	0.084654	0.0484331	15.6991	2.50009e-14	0.035911	0.00737972	0.125098	0.233723	0.591698
30	0.016895	0.113804	0.0133415	0.0132364	0.000225431	0.0791214	0.0464858	15.7436	2.95532e-14	0.0301072	0.00514534	0.125621	0.221854	0.588469
30	0.0182267	0.116647	0.0201903	0.0155447	0.00024226	0.0830239	0.0512432	15.106	1.67777e-14	0.0512625	0.00974568	0.161621	0.30445	0.737078
30	0.0179606	0.115115	0.0175781	0.0142024	0.000232281	0.0828371	0.0485232	18.9437	2.63633e-14	0.0414019	0.00831063	0.152956	0.276184	0.704201
31	0.0206711	0.120353	0.0171823	0.0126757	0.000219533	0.100372	0.0512114	23.0438	1.4088e-14	0.0442875	0.00538315	0.131457	0.243701	0.789956
31	0.01923	0.118217	0.0126873	0.0125314	0.000209327	0.0875914	0.0502335	23.9615	5.93074e-14	0.0308514	0.00378072	0.107827	0.213781	0.646801
31	0.0217215	0.115052	0.013052	0.0166265	0.000275991	0.0984077	0.0599421	16.8968	6.02876e-14	0.0305619	0.00417321	0.116097	0.220991	0.760618
31	0.0209035	0.114074	0.014036	0.0159732	0.000270095	0.0954367	0.0585872	14.3631	2.67066e-14	0.0300232	0.00407095	0.143528	0.244911	0.695131
32	0.0356321	0.118712	0.0427786	0.0216432	0.000179855	0.164167	0.0926198	19.5863	1.21751e-13	0.136689	0.00766429	0.124115	0.173591	0.314362
32	0.0437831	0.120228	0.0535392	0.0279205	0.000222498	0.19842	0.122754	12.4204	2.78472e-13	0.13514	0.00777308	0.220749	0.288238	0.440455
32	0.0345082	0.121449	0.0515554	0.0204145	0.000160614	0.159951	0.0902789	18.4027	2.16024e-13	0.159301	0.00432694	0.14124	0.193799	0.374396
32	0.0443812	0.122613	0.0518445	0.0272092	0.000208695	0.200364	0.126408	11.5296	2.96736e-13	0.138723	0.011613	0.186706	0.231123	0.424623
32	0.0294231	0.118545	0.0568228	0.0205052	0.000185664	0.131921	0.0798801	17.6986	1.4488e-13	0.154721	0.00502838	0.179852	0.237299	0.37917
32	0.0368405	0.120558	0.0506392	0.0256293	0.00023503	0.16755	0.103759	12.4465	2.21876e-13	0.128818	0.00875356	0.221574	0.288709	0.486343
32	0.0337136	0.12046	0.07508	0.0215465	0.000192012	0.155142	0.0880428	19.2661	1.29098e-13	0.200335	0.00271442	0.234726	0.304419	0.424726
32	0.0459992	0.120036	0.064372	0.0300745	0.000265139	0.210288	0.129572	12.2653	3.56204e-13	0.159681	0.0102267	0.266226	0.323442	0.471774
32	0.035909	0.118448	0.0558802	0.023849	0.000175012	0.167215	0.098301	15.0416	4.14126e-13	0.151625	0.00632877	0.183277	0.241249	0.495911
32	0.0409634	0.119224	0.0523973	0.0279613	0.000203844	0.184877	0.117949	11.6611	4.3596e-13	0.123935	0.0093138	0.2165	0.273603	0.533441
32	0.0488044	0.121803	0.0692964	0.0296655	0.000248288	0.219755	0.141197	11.762	8.56944e-14	0.177958	0.00435243	0.218519	0.270702	0.46939
32	0.0444095	0.1221	0.0695878	0.0292085	0.000232259	0.196398	0.128121	10.3683	2.44722e-13	0.157991	0.0115556	0.2723	0.324789	0.521773
33	0.0397226	0.118164	0.0596698	0.0274446	0.000194484	0.185218	0.112126	14.8299	2.2939e-13	0.141349	0.00560818	0.166455	0.216131	0.428643
33	0.0445497	0.121673	0.0492218	0.0366566	0.000236792	0.191373	0.134056	8.14776	5.44582e-13	0.107957	0.00804623	0.184392	0.238371	0.451966
33	0.0394422	0.120726	0.0448486	0.0287266	0.000197357	0.174272	0.11379	11.8814	4.31034e-13	0.128364	0.00864003	0.143175	0.199075	0.311177
33	0.0398432	0.123094	0.0363598	0.0318585	0.000211772	0.171206	0.117989	8.73011	3.19049e-13	0.0924592	0.00524129	0.13946	0.201189	0.266862
34	0.0456639	0.118576	0.0674916	0.0332816	0.000215899	0.201885	0.133548	11.556	2.75489e-13	0.177997	0.0290134	0.161829	0.251389	0.311151
34	0.0565132	0.121932	0.0584431	0.0466799	0.000279617	0.232444	0.168404	6.64941	1.14445e-12	0.129273	0.0267065	0.208878	0.293365	0.46946
34	0.048239	0.118371	0.0718446	0.0366563	0.000223397	0.209255	0.140793	10.8842	1.1986e-12	0.185349	0.0303923	0.174172	0.258499	0.29924
34	0.0584917	0.122662	0.0585354	0.049278	0.000283869	0.23754	0.175012	6.19198	2.47797e-13	0.137041	0.0277401	0.209539	0.303157	0.459647
35	0.0441801	0.119419	0.0374507	0.0379685	0.000435368	0.196999	0.126626	13.1292	1.63949e-13	0.052918	0.0120584	0.217776	0.243227	0.759693
35	0.0651684	0.121472	0.077647	0.0539056	0.000637692	0.282403	0.199285	7.34917	3.23374e-13	0.103308	0.00388202	0.319277	0.355567	0.551522
35	0.0472812	0.118126	0.0233416	0.0386678	0.000424977	0.212876	0.134707	13.0463	1.74363e-13	0.0328602	0.00902044	0.174432	0.238891	0.686687
35	0.0634168	0.120174	0.137453	0.0518279	0.00057927	0.28164	0.191448	8.17446	5.23366e-13	0.122708	0.0122571	0.411677	0.378149	0.52932
36	0.0259526	0.119407	0.0583877	0.0206029	0.000166303	0.117738	0.0736824	12.8057	2.49776e-13	0.157579	0.0142471	0.153268	0.188625	0.277439
36	0.0400847	0.122712	0.033481	0.0383107	0.000279872	0.1713	0.122874	6.83851	3.33204e-13	0.0868863	0.0173362	0.153777	0.212314	0.349064
36	0.0314007	0.120026	0.0695065	0.0248012	0.000218821	0.144428	0.0880503	14.0769	1.82368e-13	0.178271	0.0130517	0.142561	0.172763	0.38177
36	0.0505886	0.121237	0.0408293	0.0493318	0.000392299	0.214275	0.15583	6.22094	3.88706e-13	0.106225	0.0184204	0.167725	0.231439	0.43153
37	0.0375203	0.120401	0.0859404	0.0335162	0.000312775	0.164834	0.112833	9.1815	1.42125e-13	0.186817	0.0451166	0.278274	0.330303	0.599975
37	0.0213616	0.116836	0.0224776	0.0177819	0.000176595	0.0980094	0.0586798	18.3887	7.69625e-14	0.0584812	0.0201974	0.140588	0.226272	0.432636
37	0.0437811	0.123318	0.0757402	0.0388969	0.000407553	0.193192	0.129493	10.587	2.34139e-13	0.181701	0.0586632	0.264852	0.309515	0.576494
37	0.021017	0.11702	0.0188088	0.0169182	0.000189432	0.0985955	0.056785	16.286	8.09238e-14	0.0482119	0.0196511	0.130557	0.209743	0.413284
37	0.0413033	0.122511	0.0330847	0.0352829	0.000327332	0.181286	0.120014	11.5474	3.88901e-13	0.0641625	0.0939994	0.21815	0.223142	0.616925
37	0.0201422	0.116863	0.0172799	0.0168343	0.000160115	0.0922368	0.0555477	16.5689	6.67306e-14	0.0454917	0.0130956	0.144507	0.261397	0.374583
37	0.0435802	0.127257	0.0407125	0.0372789	0.000376716	0.193002	0.12967	9.56343	2.70599e-13	0.0606438	0.0904375	0.205417	0.160071	0.531979
37	0.0271452	0.11938	0.0246064	0.0215796	0.000228657	0.129678	0.0757328	15.2722	1.62353e-13	0.0529761	0.0328195	0.146462	0.16692	0.367058
38	0.0357203	0.122548	0.0818459	0.0261835	0.000313168	0.159881	0.102505	11.2453	7.45566e-14	0.194717	0.00545061	0.164058	0.195147	0.568784
38	0.0284439	0.129189	0.0150121	0.0242036	0.000259741	0.12456	0.0838683	11.8733	1.82735e-13	0.0384151	0.00544097	0.0649204	0.0993517	0.343677
38	0.0210537	0.119083	0.0597531	0.0141602	0.000194102	0.096477	0.0552973	19.2723	4.34812e-14	0.127758	0.00927003	0.121397	0.114211	0.361872
38	0.0253592	0.131346	0.014938	0.0213747	0.000252665	0.109618	0.0749418	13.0338	4.8449e-14	0.0357217	0.00535771	0.0789164	0.11279	0.240532
39	0.0458541	0.125427	0.0420459	0.0405547	0.000315374	0.198923	0.137407	8.80685	3.13237e-13	0.139676	0.0391912	0.157068	0.235183	0.460541
39	0.0367505	0.12256	0.0297169	0.0300631	0.000244518	0.162037	0.106104	12.6249	4.09263e-13	0.0741432	0.0226408	0.140662	0.198651	0.6382
39	0.0465679	0.125749	0.0590011	0.0415772	0.00038138	0.199982	0.141246	7.76292	2.27163e-13	0.175912	0.0398512	0.182899	0.250186	0.446804
39	0.0319715	0.11939	0.0266266	0.026552	0.000259878	0.141989	0.0927821	13.2001	1.14365e-13	0.0595497	0.0176406	0.129566	0.183177	0.733846
39	0.0464674	0.124429	0.0612995	0.0437242	0.000350422	0.202239	0.142481	7.37281	3.3036e-13	0.186875	0.0295473	0.187677	0.275152	0.570413
39	0.0360223	0.117876	0.0326158	0.0318522	0.000267311	0.161638	0.106003	11.2275	2.25414e-13	0.0816556	0.0153908	0.157218	0.252054	0.710859
39	0.0418369	0.123647	0.0450261	0.0379421	0.000292367	0.18392	0.127402	7.65182	4.39918e-13	0.139339	0.0239536	0.158417	0.239268	0.439204
39	0.031823	0.117776	0.027939	0.027087	0.000218423	0.145131	0.0908693	13.9556	2.86419e-13	0.0671543	0.0125155	0.126309	0.167028	0.37927
40	0.0402643	0.120571	0.0695397	0.0288461	0.000266567	0.185352	0.111364	17.8823	3.7546e-13	0.148529	0.0374217	0.184656	0.205212	0.47917
40	0.0443848	0.123349	0.048074	0.0353692	0.000309539	0.195589	0.130891	9.63752	3.65209e-13	0.109757	0.0165727	0.178454	0.223104	0.432294
40	0.0394354	0.119572	0.0682703	0.0300773	0.000267074	0.182038	0.108257	17.5098	2.6695e-13	0.136617	0.0322809	0.168316	0.183335	0.553964
40	0.0409515	0.119962	0.0413633	0.0310357	0.000277441	0.185243	0.119995	11.0298	3.31268e-13	0.0956041	0.0132342	0.144585	0.182066	0.30015
40	0.0524127	0.122384	0.0879068	0.0423538	0.000381441	0.235136	0.155582	10.4931	4.0849e-13	0.183095	0.0487659	0.237821	0.270039	0.781594
40	0.050138	0.123804	0.0416439	0.0421418	0.00037119	0.21709	0.150041	8.80985	3.49043e-13	0.108831	0.0200571	0.173991	0.233066	0.455546
40	0.0448334	0.120503	0.0781544	0.0325262	0.000305263	0.205433	0.128413	12.7667	2.62789e-13	0.150994	0.037533	0.226063	0.244857	0.530048
40	0.0442978	0.122458	0.0482392	0.0351248	0.000320481	0.194085	0.130348	9.71974	3.07268e-13	0.102996	0.0148947	0.188112	0.236236	0.462542
41	0.0535387	0.118308	0.0580863	0.0641827	0.000698513	0.219408	0.169371	4.31935	1.49978e-13	0.111974	0.0135344	0.215025	0.264098	0.749424
41	0.0419112	0.115561	0.072779	0.0493041	0.000534759	0.174449	0.134153	4.46415	1.57345e-13	0.139359	0.0132752	0.250198	0.279482	0.538532
41	0.052791	0.119522	0.050953	0.0652202	0.000690589	0.2145	0.168326	4.11272	2.06731e-13	0.103407	0.020361	0.204414	0.250409	0.712089
41	0.0424476	0.115894	0.0607858	0.0527971	0.000555928	0.17646	0.135813	4.71727	1.32426e-13	0.121001	0.0206336	0.23805	0.270881	0.565346
42	0.0481178	0.11937	0.0358625	0.0580481	0.000700366	0.196208	0.152727	4.3353	1.3736e-13	0.0661334	0.00220169	0.192861	0.258083	0.677862
42	0.038328	0.115686	0.0398132	0.0477882	0.000567779	0.158017	0.122794	4.472	9.94902e-14	0.0838264	0.0130981	0.176329	0.209584	0.50885
42	0.0503329	0.119182	0.0345935	0.0583871	0.000722683	0.208045	0.159072	4.78168	1.32567e-13	0.0650541	0.0032627	0.172981	0.228573	0.7069
42	0.0354466	0.115132	0.0395996	0.0447412	0.000530722	0.148044	0.114203	4.406	3.11444e-14	0.0800534	0.016918	0.16356	0.179546	0.511717
42	0.0271661	0.115749	0.0380654	0.0312536	0.000311868	0.116928	0.0844143	6.87522	3.32723e-14	0.0881387	0.00491754	0.157911	0.220628	0.408178
42	0.02833	0.115119	0.0367012	0.0330037	0.000328251	0.11982	0.0901467	5.12039	4.52159e-14	0.0781415	0.0158302	0.14644	0.165576	0.401931
42	0.0355599	0.116561	0.0465822	0.0433788	0.000486012	0.148058	0.114175	4.49254	8.1314e-14	0.0994522	0.00419163	0.18668	0.256399	0.655809
42	0.0331563	0.115046	0.046624	0.0390321	0.000441225	0.140097	0.105117	5.26028	9.48147e-14	0.100434	0.0224125	0.185207	0.205362	0.418346
43	0.0535245	0.117151	0.0648612	0.0669485	0.000742995	0.222524	0.172311	4.26335	3.29313e-13	0.127342	0.00635822	0.257792	0.320215	0.707686
43	0.0414052	0.115477	0.0599094	0.0516077	0.000567542	0.171741	0.131973	4.71533	1.99241e-13	0.107962	0.00991583	0.2547	0.292566	0.632867
43	0.0478456	0.117728	0.0591931	0.0532063	0.000509409	0.203005	0.149941	5.8417	3.45432e-13	0.131409	0.00617401	0.249516	0.338519	0.609496
43	0.0439053	0.115284	0.066537	0.0517978	0.000484047	0.184221	0.140113	4.88929	3.40593e-13	0.139888	0.0127824	0.28579	0.352033	0.567264
44	0.0560819	0.117888	0.0251019	0.0580112	0.000437467	0.223014	0.17077	5.51097	4.40896e-13	0.0518332	0.0198619	0.124765	0.159599	0.805372
44	0.063711	0.117787	0.0548448	0.0803309	0.000557463	0.261418	0.203939	4.16187	6.73622e-13	0.124396	0.0249563	0.248131	0.324227	0.667797
44	0.0567632	0.119337	0.0317061	0.0571553	0.000498812	0.229079	0.175146	5.03477	4.0604e-13	0.0744711	0.0112493	0.142991	0.215472	0.817038
44	0.0624309	0.117953	0.0488382	0.0787691	0.000629543	0.25426	0.200035	4.06015	3.85572e-13	0.114902	0.0156725	0.223646	0.327738	0.70665
45	0.0509177	0.124194	0.0847416	0.0390022	0.000285713	0.229131	0.147357	11.7573	2.87953e-13	0.182106	0.0653845	0.257691	0.307817	0.699684
45	0.0414407	0.126196	0.0448463	0.0322228	0.00023662	0.189341	0.120052	12.0372	2.61704e-13	0.09115	0.0248935	0.166595	0.200164	0.478875
45	0.0489191	0.123422	0.0862455	0.0363085	0.00029248	0.22081	0.142239	11.6437	4.84284e-13	0.176666	0.0819706	0.255896	0.298444	0.820248
45	0.0427097	0.124767	0.0314209	0.0322173	0.000258933	0.193459	0.121208	13.3839	1.58828e-13	0.0613343	0.0152563	0.129259	0.162205	0.628703
46	0.0552479	0.123696	0.0356687	0.0431493	0.000342415	0.236113	0.165307	9.02434	1.58091e-13	0.0539832	0.137664	0.187278	0.168206	0.713496
46	0.0445679	0.122347	0.0381206	0.0352981	0.000276292	0.191907	0.134248	8.4443	3.63919e-13	0.0668834	0.0468443	0.179532	0.19837	0.743752
46	0.0534595	0.121859	0.0390803	0.0418945	0.000309454	0.229655	0.160968	9.15981	3.64992e-13	0.0575065	0.142033	0.187932	0.162195	0.73243
46	0.0433232	0.121424	0.0377726	0.0355986	0.00025444	0.186141	0.131271	8.07501	3.94603e-13	0.0650761	0.0500966	0.178111	0.190873	0.727813
47	0.0417657	0.121571	0.0320054	0.031435	0.00024558	0.186913	0.120549	12.2158	3.7736e-13	0.0607323	0.0725961	0.26893	0.432276	0.812577
47	0.0371452	0.122997	0.0459732	0.0296431	0.000229458	0.165832	0.108218	11.3776	4.08833e-13	0.0868538	0.0332737	0.228953	0.309099	0.724979
47	0.0392389	0.121946	0.0329146	0.0273229	0.000211176	0.178302	0.109493	13.4876	3.14662e-13	0.0633648	0.0565661	0.23777	0.391005	0.788077
47	0.0344788	0.122247	0.0425429	0.0243779	0.000186979	0.154289	0.094248	16.3781	2.24035e-13	0.0864385	0.02807	0.214381	0.295703	0.683586
47	0.0378968	0.118268	0.0280394	0.0321562	0.00024345	0.171381	0.110116	12.0328	3.9378e-13	0.053409	0.0537879	0.167349	0.245348	0.814036
47	0.0315551	0.118918	0.0313972	0.0262382	0.000203889	0.144737	0.0896381	13.722	9.75143e-14	0.0632272	0.0204272	0.157741	0.200155	0.473073
47	0.0408784	0.122008	0.0282941	0.0332825	0.000242879	0.182588	0.119494	11.5376	3.46364e-13	0.0571445	0.0677104	0.207582	0.346247	0.810715
47	0.0343148	0.121568	0.0328235	0.0275646	0.000203602	0.15353	0.0995455	11.3266	6.98047e-14	0.0726939	0.0262005	0.165751	0.232961	0.448235
47	0.0433594	0.121189	0.0288594	0.0347303	0.00024554	0.191298	0.124737	13.1594	3.47231e-13	0.0505568	0.0854117	0.172046	0.209999	0.751389
47	0.0301304	0.119459	0.0436465	0.0245145	0.000174818	0.135311	0.0858923	13.2276	2.00441e-13	0.0953768	0.0236325	0.211752	0.289893	0.458266
47	0.0448837	0.120218	0.0303875	0.0360671	0.000254211	0.197499	0.129821	12.4287	1.95416e-13	0.0547936	0.0812047	0.157719	0.199172	0.774831
47	0.0307463	0.119679	0.0469908	0.0253229	0.000179039	0.137389	0.0889709	11.9993	3.27896e-13	0.0978467	0.027959	0.21294	0.261082	0.486137
47	0.0433866	0.121598	0.0288211	0.0350383	0.000264968	0.190814	0.123575	13.6577	3.00656e-13	0.0547793	0.0777053	0.170642	0.238059	0.79215
47	0.0309242	0.119936	0.0414454	0.0247696	0.000189399	0.136908	0.0891776	12.7886	2.55478e-13	0.0905763	0.0292146	0.202565	0.280775	0.477829
47	0.0410694	0.120527	0.0315224	0.0304595	0.00023445	0.185297	0.116158	13.4938	5.85432e-13	0.0625733	0.0748484	0.162983	0.240147	0.807709
47	0.0295793	0.122161	0.0450792	0.0226228	0.000172194	0.13098	0.0825882	15.8505	2.42836e-13	0.0986997	0.0226915	0.200225	0.271894	0.406046
48	0.0354619	0.121064	0.0276727	0.0296356	0.000203849	0.162297	0.102458	11.6279	4.662e-13	0.0528192	0.0581147	0.241012	0.408866	0.822259
48	0.0353264	0.121424	0.040042	0.0274161	0.000195833	0.159661	0.0988043	14.4775	3.37176e-13	0.0800187	0.0209317	0.196909	0.287918	0.67135
48	0.0389669	0.123203	0.0234394	0.0275902	0.000213165	0.178645	0.10775	14.0168	4.63685e-13	0.0363817	0.0537668	0.28299	0.425774	0.827788
48	0.0374521	0.124095	0.0332816	0.025472	0.000200942	0.169666	0.10283	15.4963	3.02657e-13	0.0627914	0.0194037	0.17183	0.287008	0.780251
49	0.0331199	0.120195	0.105715	0.021446	0.00021993	0.15572	0.0880598	18.1581	1.74448e-13	0.179755	0.0457907	0.19578	0.262967	0.206181
49	0.0269251	0.119507	0.0346812	0.0169862	0.000181046	0.124418	0.0689639	28.0583	1.23397e-13	0.0602992	0.0197914	0.0857021	0.112767	0.287877
49	0.0413391	0.120734	0.10103	0.0279072	0.000273395	0.187296	0.107226	25.9963	3.44151e-13	0.169103	0.0463667	0.205782	0.236664	0.243714
49	0.0394689	0.120196	0.0408646	0.0274086	0.000268474	0.178846	0.102274	24.8205	1.95385e-13	0.0721083	0.0199106	0.111947	0.141973	0.315102
49	0.0606198	0.125158	0.107708	0.0483981	0.00042133	0.261296	0.181211	9.09921	2.77066e-13	0.228286	0.0587431	0.266829	0.345093	0.300545
49	0.0591619	0.123305	0.0696523	0.0463641	0.000402492	0.25895	0.173736	10.6235	3.22935e-13	0.148738	0.0280408	0.171275	0.227452	0.287517
50	0.0429795	0.121938	0.0580388	0.0368115	0.000276322	0.18767	0.126861	11.2404	3.75312e-13	0.15844	0.0733095	0.183915	0.24486	0.746289
50	0.0423621	0.12014	0.0382598	0.0349107	0.000272446	0.18522	0.12182	12.4031	3.05397e-13	0.0854924	0.0508768	0.158391	0.190141	0.776535
50	0.0419618	0.121298	0.0666861	0.0348764	0.000264422	0.182839	0.123516	11.0669	3.19128e-13	0.176347	0.0520286	0.210728	0.285294	0.745388
50	0.045309	0.122165	0.0459212	0.039578	0.000292302	0.196378	0.131766	10.8018	4.07935e-13	0.101106	0.0403456	0.18191	0.225643	0.784983
50	0.0377609	0.119571	0.0501724	0.0362202	0.000267351	0.16362	0.116056	7.48064	3.50966e-13	0.140073	0.0427284	0.180109	0.249149	0.62904
50	0.0358209	0.118769	0.0298437	0.0336274	0.000252969	0.152054	0.104944	12.8453	2.1899e-13	0.0609608	0.039148	0.14016	0.167697	0.731671
50	0.0418736	0.121183	0.0760975	0.0345752	0.000265701	0.182043	0.122195	10.2212	4.44799e-13	0.195014	0.0947768	0.269057	0.336435	0.67305
50	0.0434737	0.121905	0.0454262	0.0363026	0.00028021	0.18602	0.127091	10.1984	3.87665e-13	0.102589	0.0657135	0.213959	0.25727	0.691079
51	0.0311181	0.120846	0.083798	0.0225144	0.000191971	0.145123	0.086018	15.9341	3.40408e-13	0.137615	0.0553517	0.219367	0.227405	0.703401
51	0.0293189	0.120266	0.0319967	0.0191261	0.00017549	0.136258	0.0708957	33.6611	1.66126e-13	0.0645515	0.0184708	0.120525	0.145258	0.480636
51	0.0322784	0.122688	0.0859785	0.024102	0.000204772	0.150685	0.0892563	15.4466	2.7194e-13	0.14681	0.0571606	0.234723	0.258833	0.753475
51	0.0279345	0.11952	0.0280438	0.0190567	0.000173806	0.131206	0.0693901	30.1636	1.44689e-13	0.0638849	0.0182358	0.113541	0.153053	0.347037
52	0.0395049	0.11886	0.0917304	0.0303148	0.000227832	0.184043	0.112162	13.6273	4.15173e-13	0.156449	0.0756046	0.257812	0.270276	0.765399
52	0.0305436	0.117771	0.0389615	0.0237167	0.00018008	0.142545	0.0862627	14.7781	1.98064e-13	0.0776138	0.0261126	0.147931	0.178868	0.405879
52	0.0374663	0.119968	0.0818633	0.0285326	0.000207347	0.175972	0.107414	13.4231	4.26631e-13	0.152835	0.0702048	0.236144	0.265457	0.792703
52	0.0316539	0.118618	0.0445044	0.0231012	0.000173466	0.14642	0.0881658	18.6259	3.2906e-13	0.0873362	0.0297019	0.162507	0.198477	0.492211
52	0.0387345	0.120782	0.07996	0.0294999	0.00023283	0.178297	0.112105	12.2596	1.79714e-13	0.156617	0.0607848	0.227233	0.264601	0.751665
52	0.0329472	0.120696	0.0341715	0.0214344	0.000191083	0.152967	0.087541	21.2355	2.48492e-13	0.0720405	0.0363805	0.119643	0.152063	0.464318
52	0.0399407	0.120179	0.0868934	0.0292786	0.000234165	0.184679	0.11489	12.6617	6.16987e-13	0.160713	0.0636345	0.241995	0.268372	0.844389
52	0.0328297	0.12059	0.0397748	0.0228284	0.000188631	0.152121	0.0891692	18.5186	1.07601e-13	0.0802581	0.035933	0.133864	0.161089	0.482884
53	0.0367348	0.120469	0.0754178	0.0297683	0.000208671	0.16453	0.107384	10.5966	3.82504e-13	0.201098	0.0483402	0.204346	0.270027	0.694196
53	0.0322676	0.120641	0.0528388	0.0266536	0.000185691	0.144578	0.0931914	11.9025	2.76235e-13	0.13578	0.0522873	0.187174	0.245287	0.743789
53	0.0335891	0.119978	0.0684155	0.0261066	0.000188629	0.150038	0.0960127	12.9481	3.30883e-13	0.193885	0.0219584	0.186969	0.243483	0.411549
53	0.033096	0.120252	0.0461872	0.0272296	0.000194112	0.147871	0.0941668	13.0512	1.89525e-13	0.138119	0.0116762	0.161547	0.242387	0.379366
53	0.0277021	0.116979	0.0724897	0.0220002	0.000180706	0.125742	0.0789619	13.3187	2.78443e-13	0.190311	0.0208062	0.193278	0.232985	0.393724
53	0.0248911	0.11641	0.0485221	0.0205232	0.000165391	0.113107	0.0713083	13.4374	2.95348e-13	0.124301	0.0167298	0.174119	0.22304	0.490215
53	0.0337932	0.119831	0.0663577	0.0255087	0.000205104	0.15636	0.0946514	14.2862	2.13547e-13	0.182772	0.0448562	0.172691	0.211864	0.453865
53	0.0308161	0.119112	0.0406133	0.0236414	0.000187548	0.139935	0.0856939	15.8759	1.05208e-13	0.113395	0.0195834	0.155088	0.211966	0.421413
53	0.0351595	0.120004	0.0582653	0.0287215	0.000210558	0.157768	0.103173	11.2118	3.16114e-13	0.173448	0.0111455	0.176636	0.248748	0.393671
53	0.0289627	0.11981	0.0370588	0.0242214	0.000174539	0.128575	0.0843223	13.6692	2.64676e-13	0.102457	0.00526151	0.134618	0.194523	0.398941
53	0.0354403	0.117697	0.047874	0.0302325	0.000212824	0.157722	0.103486	12.9772	3.54924e-13	0.146958	0.00975234	0.161296	0.250514	0.455865
53	0.0310374	0.117807	0.0349685	0.0268276	0.000187976	0.137837	0.0903816	13.1001	1.94416e-13	0.100947	0.00530907	0.133208	0.208049	0.419823
53	0.0337313	0.120039	0.0696748	0.0265972	0.00019501	0.150199	0.0968859	13.8105	2.76543e-13	0.179023	0.0647428	0.218142	0.261813	0.637976
53	0.0338375	0.120274	0.0593039	0.0275987	0.000200108	0.14977	0.0990857	11.6079	2.56997e-13	0.141063	0.0574239	0.209566	0.251481	0.736934
53	0.0366804	0.117155	0.0715117	0.0312842	0.00023592	0.164566	0.105992	12.6408	2.05651e-13	0.190462	0.0380222	0.198102	0.254226	0.564732
53	0.0329052	0.118343	0.0495744	0.0267384	0.000208072	0.146576	0.0935138	13.343	1.71756e-13	0.131227	0.0255385	0.168156	0.221681	0.54828
53	0.0384828	0.121143	0.0647537	0.0319522	0.000248954	0.171653	0.112043	13.2317	2.5624e-13	0.177764	0.0179772	0.185582	0.262484	0.626413
53	0.0345464	0.119791	0.0476272	0.0303928	0.000233245	0.15296	0.101865	11.7808	2.10542e-13	0.122195	0.0321473	0.153289	0.210533	0.721005
53	0.0396444	0.120872	0.0632746	0.0318388	0.000244586	0.176923	0.11412	13.789	5.77099e-13	0.179121	0.0194008	0.179884	0.258897	0.619952
53	0.0339662	0.119253	0.0430351	0.0286875	0.000219736	0.151317	0.0979826	14.0157	2.67754e-13	0.114982	0.0226342	0.140851	0.207612	0.715689
54	0.0334831	0.12045	0.0373916	0.0234792	0.000180567	0.154933	0.0914261	17.0491	2.82611e-13	0.0552231	0.00350443	0.454986	0.564247	0.626777
54	0.0306542	0.119463	0.0471632	0.0207781	0.000166548	0.142273	0.0852546	15.6924	2.34775e-13	0.0932601	0.00495946	0.223923	0.304616	0.435743
54	0.0355883	0.123689	0.0371391	0.0251346	0.000203981	0.163063	0.0995069	14.2629	1.47821e-13	0.0543641	0.00512011	0.447657	0.56933	0.574679
54	0.0332867	0.120313	0.0446791	0.0214974	0.000188988	0.152218	0.0920962	16.1451	2.33892e-13	0.0898666	0.00522038	0.220846	0.314169	0.419149
54	0.0354282	0.123222	0.029098	0.0269523	0.000202794	0.158942	0.101188	12.473	3.98409e-13	0.0364366	0.00603702	0.46513	0.567015	0.710517
54	0.0365217	0.120433	0.0544291	0.0281946	0.000211064	0.163395	0.103976	13.5542	3.33963e-13	0.100236	0.00435383	0.252774	0.356024	0.635462
54	0.0345671	0.121203	0.0294295	0.0253911	0.000195542	0.15525	0.0961994	17.2661	3.39421e-13	0.0441036	0.00420648	0.35781	0.520908	0.705527
54	0.0322989	0.120641	0.052589	0.0239797	0.000185766	0.146553	0.0909358	14.1616	4.43535e-13	0.106541	0.00353961	0.24514	0.359135	0.524291
55	0.0377669	0.119798	0.0430304	0.0314825	0.000292838	0.174516	0.110142	11.0046	3.2762e-13	0.0678545	0.0594638	0.313886	0.369407	0.838567
55	0.0344017	0.119115	0.0282816	0.0264527	0.000263335	0.159324	0.0957363	15.7984	2.45638e-13	0.0570991	0.0214245	0.1263	0.170707	0.386988
55	0.0397582	0.118338	0.0330094	0.0294919	0.000309938	0.185634	0.112244	14.2162	2.09061e-13	0.0548944	0.0510141	0.236651	0.288598	0.810188
55	0.0366918	0.123293	0.029738	0.0267401	0.000288613	0.167455	0.103614	13.5604	1.34101e-13	0.0524891	0.0269531	0.125594	0.148666	0.412546
56	0.0426766	0.120954	0.0376037	0.0302104	0.000266632	0.19335	0.119418	16.2426	4.40969e-13	0.0675797	0.107843	0.235795	0.286703	0.848673
56	0.0423105	0.127258	0.0353207	0.0298297	0.000267586	0.193615	0.120225	13.2873	2.16995e-13	0.0687659	0.0219605	0.137936	0.175732	0.535311
56	0.0381506	0.119252	0.0370309	0.0295436	0.000238409	0.177677	0.109704	13.2018	4.0056e-13	0.0661581	0.0742489	0.22891	0.287525	0.841666
56	0.0361066	0.123944	0.0336732	0.0285578	0.000230376	0.162743	0.104283	12.6937	2.11264e-13	0.0597826	0.0292049	0.12809	0.153052	0.503676
56	0.0416203	0.121625	0.0298161	0.0308743	0.000272243	0.193858	0.117936	13.7394	2.22498e-13	0.0492798	0.0893175	0.239092	0.309434	0.864357
56	0.0389947	0.129682	0.0337062	0.0278055	0.000254523	0.18288	0.106539	14.7672	2.37392e-13	0.0606772	0.0326924	0.139591	0.176384	0.605268
56	0.0424751	0.121672	0.0281224	0.0311855	0.00026322	0.196583	0.119118	15.3881	1.23717e-13	0.0555457	0.0833573	0.198864	0.270174	0.811639
56	0.0371383	0.127049	0.0326807	0.0283918	0.000235922	0.168825	0.105342	13.0362	1.75667e-13	0.0597872	0.0192168	0.141985	0.185344	0.507225
57	0.0530695	0.124563	0.0991357	0.0376635	0.000317685	0.236833	0.151931	12.2783	1.18183e-13	0.228859	0.0763848	0.278404	0.330505	0.648687
57	0.0543309	0.1249	0.0591909	0.0398837	0.000334752	0.245671	0.156335	13.1324	5.58169e-13	0.148422	0.0334609	0.206813	0.274043	0.469632
57	0.0548075	0.122699	0.101504	0.0407316	0.000299896	0.245704	0.158758	11.7557	9.068e-13	0.236444	0.0732948	0.276651	0.334837	0.768584
57	0.0615717	0.125311	0.0607235	0.0449505	0.000343945	0.282265	0.174567	13.7372	6.98292e-13	0.155615	0.0343605	0.209488	0.281903	0.617339
58	0.0227662	0.116172	0.0126564	0.0181242	0.000345992	0.103576	0.0637974	14.7666	3.38397e-14	0.0228925	0.00578822	0.0828423	0.100652	0.222191
58	0.0267468	0.117166	0.0194601	0.0199892	0.000406346	0.123962	0.0756893	13.27	4.31166e-14	0.0424962	0.00787344	0.112311	0.176978	0.264491
59	0.036426	0.118879	0.0634679	0.0364992	0.000408133	0.157576	0.111153	7.37755	2.74358e-13	0.156105	0.0429266	0.263105	0.32922	0.694303
59	0.038373	0.117595	0.0330298	0.0406874	0.000452617	0.16688	0.118489	6.80526	1.60096e-13	0.0796505	0.020161	0.184523	0.252065	0.625227
59	0.0455612	0.119813	0.0727866	0.041989	0.000496508	0.195117	0.139063	7.09978	2.61943e-13	0.175066	0.0630422	0.284173	0.32988	0.701116
59	0.0438665	0.120013	0.043396	0.045159	0.000513101	0.18536	0.137751	5.62597	1.02882e-13	0.100896	0.0367726	0.223224	0.266886	0.65976
60	0.0439944	0.11972	0.0646787	0.0422195	0.000383054	0.189615	0.133619	7.7014	2.73919e-13	0.152912	0.026586	0.239064	0.298398	0.753621
60	0.0419916	0.117986	0.037078	0.0427628	0.000385085	0.180082	0.129599	6.9148	2.39749e-13	0.0795753	0.0295225	0.183745	0.224346	0.714254
60	0.0421142	0.120704	0.0668148	0.0430392	0.0004127	0.176361	0.131523	5.90522	2.06852e-13	0.158815	0.02204	0.250333	0.3149	0.690015
60	0.0406354	0.118663	0.0371893	0.0430534	0.000411539	0.173444	0.126866	6.33718	2.09785e-13	0.0830596	0.0192183	0.186301	0.235812	0.601474
61	0.0540202	0.121421	0.0671901	0.0510464	0.000356023	0.228589	0.164014	7.16084	3.63827e-13	0.18885	0.0110239	0.203364	0.306196	0.608859
61	0.0585543	0.121569	0.0537501	0.054752	0.000389579	0.247722	0.178693	6.03853	2.0372e-13	0.146437	0.0109093	0.231062	0.357439	0.561348
61	0.0558355	0.123882	0.0439122	0.0509501	0.000348346	0.234387	0.168768	6.99886	6.23822e-13	0.151345	0.0106943	0.150148	0.270621	0.535748
61	0.0588014	0.12377	0.0442788	0.0546683	0.00037716	0.246693	0.178692	5.92285	5.86346e-13	0.130253	0.00693196	0.223031	0.382683	0.557839
62	0.0358267	0.1172	0.0483687	0.0198436	0.000396936	0.173923	0.0753961	32.7542	4.90646e-14	0.166631	0.0229925	0.113088	0.165112	0.375565
62	0.033963	0.121059	0.0492378	0.0220032	0.000401859	0.153854	0.083821	26.8325	5.74592e-14	0.178804	0.0262573	0.123235	0.186636	0.281283
63	0.03537	0.119952	0.0644644	0.0322236	0.000296245	0.156755	0.105915	8.98562	2.59049e-13	0.163906	0.0479196	0.204838	0.255541	0.70766
63	0.0347239	0.117173	0.0540675	0.0303959	0.00028752	0.155304	0.102084	10.8826	1.73036e-13	0.140518	0.0454576	0.189336	0.236353	0.643972
63	0.032875	0.120171	0.0614159	0.0275908	0.00025548	0.149742	0.0972601	10.3982	1.97471e-13	0.161058	0.0344303	0.213978	0.277741	0.673092
63	0.0330413	0.118987	0.0526705	0.0278616	0.000262713	0.148893	0.0951534	12.5819	1.90738e-13	0.132193	0.0332055	0.198082	0.252453	0.662238
64	0.0524095	0.117786	0.0301604	0.0532652	0.000574258	0.221758	0.16219	6.26911	1.85664e-13	0.0403721	0.0208922	0.147249	0.148136	0.424199
64	0.0408287	0.115832	0.0238091	0.0445258	0.000466742	0.175314	0.126832	5.80138	2.32372e-13	0.0352231	0.0169417	0.117179	0.13648	0.322459
64	0.0448166	0.117585	0.0354649	0.0432777	0.000412837	0.191407	0.135828	6.85581	2.38876e-13	0.0529795	0.0278619	0.171107	0.184363	0.475669
64	0.0313908	0.117011	0.0208548	0.0294351	0.000289278	0.139676	0.0928251	9.86453	1.16057e-13	0.0416189	0.0170485	0.113881	0.161766	0.307412
65	0.0390288	0.123026	0.0694326	0.0328181	0.000252142	0.172458	0.1161	9.85241	3.44614e-13	0.171384	0.0840264	0.206969	0.243078	0.791712
65	0.0504707	0.122014	0.0629251	0.0433955	0.000330396	0.219586	0.149994	9.26245	5.27035e-13	0.153595	0.0692804	0.218723	0.259476	0.731326
65	0.0353067	0.120992	0.0680814	0.0299794	0.000216655	0.156874	0.104348	11.5448	4.73927e-13	0.172797	0.07914	0.217206	0.265626	0.774579
65	0.0418522	0.121503	0.0529884	0.0367769	0.000262919	0.182194	0.125331	9.14067	4.44404e-13	0.134519	0.0632818	0.19469	0.239719	0.718793
66	0.0496043	0.11797	0.0429594	0.0606099	0.000654643	0.199444	0.157836	3.74424	1.76363e-13	0.118683	0.0118056	0.15292	0.216295	0.486818
66	0.042329	0.114977	0.0567446	0.0492583	0.000547529	0.178444	0.13379	5.26078	1.04041e-13	0.137446	0.0216767	0.232443	0.268603	0.317134
66	0.0473215	0.118307	0.0316984	0.0592841	0.000672948	0.188657	0.151283	3.71105	9.83957e-14	0.0963702	0.0125516	0.11812	0.19134	0.550244
66	0.0395341	0.114339	0.0504032	0.04702	0.000545208	0.168302	0.125638	5.4352	1.98957e-13	0.115504	0.0188101	0.203091	0.232346	0.397951
67	0.0429614	0.118321	0.0480894	0.0508073	0.000673739	0.174144	0.135658	4.22391	1.02326e-13	0.123649	0.00902702	0.160507	0.233557	0.643831
67	0.0421712	0.115586	0.0419614	0.0550076	0.000693568	0.174542	0.136864	4.01648	1.23337e-13	0.0986025	0.0271774	0.163325	0.185717	0.374266
67	0.0535609	0.120309	0.0413234	0.061265	0.000822502	0.214155	0.169585	3.81227	9.0327e-14	0.108544	0.00914308	0.143672	0.206685	0.561353
67	0.0401521	0.114441	0.0440242	0.0524491	0.000653689	0.166054	0.130348	3.98119	1.50143e-13	0.0968168	0.0308041	0.170936	0.18246	0.391743
68	0.0442032	0.114506	0.0448935	0.053317	0.000543302	0.180931	0.14133	4.16672	2.33148e-13	0.114324	0.00967682	0.170531	0.240386	0.488323
68	0.0369458	0.115025	0.0517669	0.0426595	0.000444023	0.157549	0.115835	5.31261	1.15662e-13	0.132546	0.0258485	0.257851	0.327874	0.33738
68	0.0408986	0.113996	0.0478871	0.0485525	0.000510145	0.171423	0.128959	5.15179	1.64073e-13	0.116174	0.0102363	0.187533	0.263542	0.508997
68	0.033441	0.115866	0.0449545	0.0379811	0.000407088	0.141584	0.104797	5.32239	6.84582e-14	0.0968363	0.0274857	0.219816	0.235623	0.39197
68	0.0353463	0.11685	0.0715405	0.0382046	0.000443398	0.15236	0.108697	6.43009	3.85975e-14	0.160905	0.00484686	0.163766	0.1996	0.537197
68	0.0383205	0.115955	0.0623211	0.0401743	0.00047109	0.161315	0.117678	5.97187	2.28387e-13	0.133319	0.0297039	0.237975	0.258329	0.441727
68	0.0426594	0.114931	0.0888061	0.0467387	0.000565713	0.18706	0.131159	6.67548	9.72818e-14	0.189334	0.00377177	0.215306	0.259738	0.596428
68	0.0448052	0.115551	0.0687446	0.0499077	0.00059625	0.191835	0.139011	6.01438	1.19346e-13	0.1604	0.0305992	0.270798	0.318406	0.399657
68	0.0432798	0.115554	0.0265813	0.0539718	0.000564297	0.183312	0.138289	4.7365	3.33151e-13	0.0748453	0.00964526	0.107645	0.166716	0.408723
68	0.033284	0.115791	0.0335304	0.0391336	0.000413085	0.141784	0.104445	5.27683	9.09571e-14	0.0790092	0.0215804	0.166542	0.197107	0.350384
68	0.0436773	0.115529	0.0341935	0.0533439	0.000564732	0.184544	0.139745	4.82333	9.93786e-14	0.109221	0.00862723	0.12647	0.210321	0.517524
68	0.040914	0.11533	0.0409946	0.047452	0.000509575	0.172862	0.128544	5.30665	1.772e-13	0.10367	0.0283261	0.196173	0.238908	0.413286
69	0.0248075	0.115835	0.0650636	0.0176249	0.000229913	0.11292	0.064517	24.0771	8.90872e-14	0.189831	0.0291395	0.142283	0.187088	0.552943
69	0.0253613	0.116208	0.0294734	0.0190583	0.000244413	0.115005	0.0696532	17.6124	6.35348e-14	0.0769245	0.0331891	0.114785	0.137626	0.272567
69	0.0212823	0.114318	0.0574307	0.0164807	0.000209672	0.0964357	0.0567125	24.6081	3.85994e-14	0.160343	0.0445136	0.12606	0.162875	0.564836
69	0.0209891	0.116489	0.0270935	0.0159501	0.000208541	0.0975864	0.0565199	17.1736	3.91039e-14	0.0719732	0.0365992	0.104678	0.123096	0.264942
70	0.0362126	0.11681	0.0438588	0.0279872	9.68457e-05	0.165187	0.0995687	16.9574	1.58233e-12	0.225453	0.068529	0.250121	0.255566	0.294804
70	0.0428797	0.118907	0.0309551	0.0329359	0.000117953	0.198085	0.120623	13.7086	1.52299e-12	0.211633	0.0866835	0.123747	0.213925	0.321188
71	0.0402656	0.119597	0.0245233	0.0350092	0.000236562	0.179908	0.122142	9.06214	1.67604e-13	0.0366071	0.00444701	0.113871	0.121176	0.50849
71	0.0481609	0.122424	0.0509145	0.0409067	0.000283621	0.214534	0.147521	8.39596	3.9131e-13	0.0555364	0.00525511	0.194771	0.177602	0.504029
71	0.0321333	0.119578	0.0196173	0.0272949	0.000182538	0.143113	0.0965646	9.38878	1.93781e-13	0.0379138	0.00540303	0.0988538	0.123168	0.336284
71	0.0402497	0.121796	0.0420385	0.0337644	0.000226955	0.17827	0.12358	7.99861	4.24434e-13	0.0495626	0.0053541	0.174	0.175456	0.510209
72	0.0565351	0.120123	0.0240929	0.0613495	0.000772935	0.238211	0.177851	5.80516	3.17475e-13	0.0798065	0.025116	0.121044	0.204414	0.59754
72	0.0469047	0.117916	0.0185384	0.0524673	0.000652107	0.19908	0.147142	5.92772	1.7842e-13	0.0704117	0.0240202	0.0818396	0.150615	0.448826
72	0.0544264	0.120421	0.0323044	0.0610398	0.000761426	0.229413	0.171907	5.66672	2.93304e-13	0.108876	0.0243278	0.164615	0.276916	0.583079
72	0.0454201	0.117505	0.0231868	0.0507852	0.000636777	0.195309	0.14148	6.84675	1.43282e-13	0.0846346	0.0223102	0.103915	0.181608	0.462394
72	0.0608504	0.11965	0.0274882	0.0659691	0.00083443	0.254175	0.189931	6.17575	1.39769e-13	0.0956223	0.0238468	0.140554	0.244663	0.6092
72	0.0441968	0.116811	0.0191379	0.0491043	0.000613589	0.188254	0.137934	6.13735	1.73214e-13	0.0770906	0.020612	0.0863052	0.166724	0.469573
72	0.0567313	0.121633	0.0297662	0.0624884	0.000872981	0.241175	0.175421	7.42079	1.49128e-13	0.0871736	0.0322732	0.141903	0.210898	0.643877
72	0.0442849	0.117625	0.028963	0.0498971	0.000686975	0.190205	0.137282	7.29425	1.52617e-13	0.087512	0.0232261	0.102678	0.189617	0.546571
73	0.0424847	0.117762	0.107343	0.0326123	0.000242741	0.190795	0.124884	10.9956	3.41386e-13	0.100085	0.0293334	0.320467	0.30934	0.803142
73	0.0428872	0.117383	0.0863169	0.0333653	0.000246328	0.189813	0.125803	10.7088	4.92916e-13	0.077616	0.0178401	0.284908	0.242953	0.626573
73	0.0415124	0.117084	0.0873409	0.0339004	0.000246156	0.186903	0.123508	9.91786	1.90964e-13	0.0733264	0.0207819	0.306421	0.317689	0.765952
73	0.0430767	0.117026	0.0766478	0.033969	0.000252018	0.191508	0.126637	10.4521	4.18796e-13	0.0629459	0.0157844	0.267734	0.220054	0.599762
73	0.0409547	0.11817	0.0213578	0.0338936	0.000234182	0.184736	0.122268	9.63039	4.22652e-13	0.0486469	0.017197	0.140097	0.208393	0.763465
73	0.044036	0.116468	0.0221816	0.0353564	0.000248201	0.196351	0.128486	11.2753	6.26681e-13	0.0420281	0.0111476	0.132802	0.174144	0.652686
74	0.0320396	0.116949	0.128624	0.0213835	0.000163009	0.15179	0.0842784	20.9786	2.07627e-13	0.126091	0.0326137	0.33322	0.294377	0.819104
74	0.0300462	0.118817	0.0291772	0.0217063	0.000160169	0.139072	0.0830347	15.6071	3.19467e-13	0.0452369	0.00983396	0.131796	0.145764	0.516072
74	0.036675	0.117347	0.12246	0.0328288	0.000219134	0.167079	0.107114	11.5752	3.5352e-13	0.115186	0.0435932	0.357472	0.353884	0.818971
74	0.0337143	0.121559	0.0327746	0.0272451	0.000191864	0.153372	0.0971727	13.1684	3.32437e-13	0.0513796	0.00662049	0.158397	0.192086	0.556224
75	0.0414461	0.116688	0.0168825	0.0322078	0.000271688	0.187879	0.118605	11.7341	3.62162e-13	0.0252497	0.00435508	0.104569	0.117231	0.334849
75	0.0408527	0.118615	0.0359993	0.0328653	0.000273586	0.183743	0.118797	10.3726	3.70184e-13	0.04299	0.00556158	0.181023	0.183971	0.349687
75	0.0401805	0.115408	0.0256737	0.034274	0.000250577	0.185467	0.116252	11.5934	3.85938e-13	0.0294382	0.00384156	0.151081	0.15694	0.432107
75	0.0418491	0.116702	0.0536923	0.0334046	0.000256106	0.188275	0.119522	11.9016	4.59989e-13	0.0471025	0.00755612	0.233013	0.208504	0.395074
76	0.0366536	0.117348	0.1015	0.0294907	0.000172732	0.170392	0.104499	13.249	4.49681e-13	0.0794558	0.103411	0.419023	0.216761	0.770665
76	0.0308036	0.11588	0.0315517	0.0249596	0.000146122	0.143931	0.0864335	15.7062	2.74815e-13	0.0445533	0.00710755	0.132388	0.141956	0.535195
76	0.0378628	0.118094	0.106052	0.0301416	0.00019381	0.173366	0.107291	13.5141	8.58444e-13	0.0837451	0.1076	0.447905	0.22631	0.762371
76	0.0301844	0.11568	0.0327217	0.0215951	0.000150545	0.143443	0.0811688	19.6224	1.78987e-13	0.0483537	0.00699649	0.136976	0.153731	0.540494
76	0.030515	0.115873	0.0772985	0.0230996	0.000135325	0.143127	0.0848719	16.655	2.52664e-13	0.0852589	0.0172846	0.198886	0.175334	0.593745
76	0.031518	0.116526	0.0335084	0.0254677	0.000144531	0.145572	0.0888479	14.8431	4.5995e-13	0.0464071	0.0129902	0.131208	0.132006	0.595882
76	0.0343858	0.117163	0.100042	0.0241888	0.000146662	0.161212	0.0940663	17.3205	2.18398e-13	0.0895905	0.0241207	0.234164	0.170549	0.746157
76	0.0334311	0.118133	0.0386682	0.023858	0.000144693	0.154239	0.0928715	15.6902	4.13648e-13	0.0536585	0.0133046	0.137359	0.144288	0.62385
77	0.037634	0.115999	0.078289	0.0357887	0.000256538	0.170403	0.110199	12.1015	6.56972e-13	0.0740949	0.0162334	0.269307	0.281203	0.760452
77	0.0324871	0.116451	0.0336567	0.0277898	0.000212606	0.150404	0.0949251	12.0644	3.7403e-13	0.0427735	0.00516029	0.168326	0.183339	0.47602
77	0.0349932	0.116322	0.0741014	0.0317711	0.000221746	0.161183	0.101316	12.4264	1.08483e-13	0.0727624	0.0162546	0.215762	0.225236	0.82529
77	0.0312465	0.116074	0.0308399	0.026949	0.000196242	0.142183	0.0902802	13.0511	2.98053e-13	0.051541	0.00482674	0.152667	0.195982	0.495291
78	0.0346434	0.116849	0.124456	0.0298963	0.000197546	0.158124	0.0998805	12.9016	4.53471e-13	0.11893	0.0417713	0.358783	0.333632	0.753709
78	0.0288038	0.12102	0.0281719	0.0226319	0.000157925	0.132276	0.0821249	14.2734	4.64241e-13	0.0415662	0.00530744	0.124361	0.14166	0.486312
78	0.0323621	0.116468	0.116063	0.026589	0.00018573	0.150112	0.0919146	13.9715	4.60632e-13	0.112996	0.0318747	0.354608	0.319575	0.779627
78	0.0304898	0.119263	0.0487768	0.0232927	0.000172421	0.140393	0.0860358	14.4449	3.07007e-13	0.0575325	0.00979337	0.187078	0.179026	0.504601
79	0.0339668	0.1161	0.0709476	0.0311691	0.000187179	0.153509	0.099882	11.8407	1.03877e-12	0.0520753	0.0173318	0.379847	0.371964	0.831383
79	0.0388113	0.118998	0.0271911	0.0364091	0.000216293	0.173949	0.116517	10.1602	4.20486e-13	0.0415614	0.00455041	0.201702	0.259613	0.594922
79	0.0345271	0.115391	0.0507383	0.0301172	0.00017379	0.159964	0.100276	12.4426	6.71231e-13	0.0461314	0.0101012	0.325409	0.421645	0.787967
79	0.0404963	0.118638	0.0282368	0.0378652	0.000211069	0.18192	0.121557	9.91213	9.03797e-13	0.0458076	0.0056193	0.179307	0.253203	0.694772
80	0.0348081	0.118287	0.060798	0.0303209	0.000237278	0.158283	0.102787	11.0908	1.68511e-13	0.0536613	0.0170407	0.264919	0.238228	0.740976
80	0.0367583	0.121725	0.0316942	0.0309075	0.000249452	0.166509	0.10745	10.7662	3.14727e-13	0.0560647	0.00407052	0.196497	0.267517	0.524549
80	0.0318751	0.118696	0.0608706	0.0236765	0.000170278	0.149096	0.0894911	14.513	4.91941e-13	0.0641863	0.020101	0.242793	0.22439	0.656108
80	0.0337299	0.122989	0.0333745	0.0266705	0.000187809	0.152279	0.0974327	12.5941	3.4751e-13	0.0692823	0.00709336	0.189608	0.269635	0.466599
80	0.0403309	0.118248	0.158711	0.0371296	0.000246472	0.182207	0.120462	10.1157	3.48238e-13	0.119956	0.0760728	0.567488	0.533894	0.785149
80	0.0437574	0.120644	0.0302122	0.0402016	0.000271423	0.196841	0.131108	9.88649	4.00286e-13	0.044114	0.00375418	0.231062	0.309082	0.652112
80	0.0392656	0.11827	0.103785	0.0363306	0.000267446	0.175715	0.118151	8.98712	3.36958e-13	0.114383	0.0246504	0.439086	0.510905	0.801651
80	0.0379256	0.120544	0.0297794	0.0327761	0.000254076	0.170704	0.113751	9.6454	1.84974e-13	0.0478675	0.00261464	0.195162	0.261031	0.552991
81	0.0395418	0.117197	0.0538767	0.0346901	0.000250272	0.174631	0.119074	9.04782	4.14788e-13	0.0565636	0.00828296	0.16712	0.162159	0.653345
81	0.0366343	0.116431	0.0609655	0.0301283	0.000227333	0.162906	0.10964	9.81899	3.76189e-13	0.0596159	0.00905619	0.205392	0.189615	0.535265
81	0.0374898	0.115843	0.0323729	0.0329013	0.000308723	0.164557	0.112378	9.82262	1.29098e-13	0.0440588	0.00349914	0.145611	0.155244	0.521391
81	0.0361659	0.1156	0.0504431	0.0317241	0.000295412	0.160528	0.108917	8.70877	3.27056e-13	0.0512227	0.0046973	0.19623	0.183728	0.436957
82	0.0291223	0.112525	0.0105983	0.0290537	0.000205641	0.12964	0.0867312	10.2325	3.38482e-13	0.0230131	0.00989914	0.111595	0.210425	0.526318
82	0.0247839	0.112935	0.0121396	0.0248379	0.000174934	0.110834	0.0737689	11.0165	3.34143e-13	0.0287086	0.0131303	0.132144	0.263358	0.55807
82	0.0341576	0.113356	0.0266501	0.0329581	0.000215229	0.152756	0.101183	10.0959	5.03263e-13	0.0396868	0.0121174	0.157773	0.254429	0.414216
82	0.0289696	0.112994	0.0218446	0.0288069	0.000186871	0.130038	0.086042	10.6985	3.71447e-13	0.0354833	0.0123214	0.170188	0.275225	0.466603
82	0.031683	0.113139	0.0298019	0.0297065	0.000196586	0.139018	0.0945786	9.60006	1.36529e-13	0.0416536	0.0208115	0.137828	0.178235	0.390809
82	0.026958	0.112855	0.0259861	0.0252728	0.000168092	0.122227	0.0793646	11.2291	3.45713e-13	0.0431119	0.0155451	0.168118	0.246336	0.417053
82	0.0333047	0.113025	0.0497233	0.033938	0.000208595	0.146671	0.100543	8.60278	4.48381e-13	0.0507458	0.0192922	0.223562	0.271978	0.452147
82	0.0320179	0.113471	0.0354312	0.031699	0.000198294	0.144813	0.0952297	10.4053	3.24081e-13	0.0453561	0.0187856	0.228952	0.302159	0.547083
83	0.0193774	0.117655	0.00585024	0.0110562	0.000156203	0.0907155	0.0479722	24.3317	5.96743e-14	0.0156968	0.00839776	0.056618	0.127204	0.150383
83	0.0173044	0.119505	0.0102492	0.0102226	0.000142147	0.0799028	0.0389397	39.5161	2.99888e-14	0.0547677	0.0117082	0.0939095	0.253233	0.152686
83	0.021199	0.117058	0.00866297	0.0105816	0.000162636	0.0988158	0.0509157	31.9447	4.70863e-14	0.0185256	0.0188829	0.0955548	0.114789	0.158624
83	0.0199583	0.118195	0.013562	0.0133861	0.000164619	0.093601	0.0467753	37.0686	6.67939e-14	0.0737841	0.0122758	0.123848	0.287451	0.12347
83	0.0197369	0.114294	0.00753859	0.0142401	0.000166105	0.0938798	0.0534126	16.7521	6.60974e-14	0.0179299	0.00859483	0.0636558	0.104896	0.210102
83	0.0168531	0.114643	0.00917111	0.0123358	0.000142972	0.0802278	0.0446052	19.8803	1.12934e-13	0.0378601	0.0113405	0.0896828	0.187082	0.163165
84	0.0382722	0.120171	0.0520138	0.0327117	0.000260941	0.166881	0.113476	9.96239	2.23689e-13	0.142799	0.0163169	0.181953	0.25984	0.55146
84	0.0409226	0.11948	0.0430561	0.0372313	0.000291063	0.178749	0.124072	8.15942	4.20205e-13	0.108603	0.0165264	0.166742	0.231817	0.557684
85	0.0443377	0.112736	0.0456717	0.0543744	0.000679195	0.18812	0.142932	4.73458	1.5732e-13	0.130509	0.0149774	0.136826	0.192605	0.420689
85	0.0423279	0.11424	0.0623218	0.0505958	0.000631032	0.179073	0.134756	5.0094	1.20586e-13	0.1557	0.0118137	0.241049	0.29913	0.255506
85	0.0407484	0.114273	0.0367864	0.0515839	0.000571385	0.170255	0.131695	4.65767	1.8937e-13	0.10782	0.0125663	0.121312	0.178984	0.351865
85	0.0401403	0.114476	0.0547408	0.0496439	0.000551839	0.167996	0.128543	4.98404	2.13316e-13	0.137011	0.0111101	0.224794	0.278193	0.255381
86	0.020294	0.119967	0.00838762	0.0100371	0.00013812	0.0918291	0.0516574	22.8352	8.854e-14	0.031908	0.0114292	0.0517677	0.222199	0.413942
86	0.0169477	0.119522	0.00569693	0.00725698	0.000112263	0.0746344	0.0368938	47.2245	5.78455e-14	0.0266113	0.015716	0.0339735	0.186521	0.526191
86	0.0193086	0.11961	0.00672034	0.00840229	0.000140471	0.0896108	0.0477824	22.4762	5.02407e-14	0.0198858	0.0110209	0.0374151	0.121948	0.319159
86
86	0.0236026	0.11458	0.0131352	0.0183881	0.000210237	0.107039	0.0652316	17.3309	7.21258e-14	0.0310674	0.00639511	0.113132	0.236621	0.326852
86	0.017502	0.115941	0.00864008	0.0109006	0.000145185	0.0805045	0.0439002	27.5063	1.83848e-14	0.0266991	0.00968584	0.0734751	0.21758	0.353133
86	0.0227305	0.11417	0.0118732	0.017183	0.000210979	0.102692	0.0604423	21.7198	8.90654e-14	0.0340302	0.0107574	0.096331	0.215132	0.264289
86	0.0190224	0.114437	0.0134047	0.0144171	0.000176913	0.0846117	0.0482786	30.7854	3.3672e-14	0.0511747	0.0148575	0.113961	0.295155	0.359314
87	0.0199469	0.12092	0.0242649	0.0175873	0.000227509	0.0877487	0.0572546	10.5487	6.18291e-14	0.0595806	0.0118688	0.155887	0.226525	0.261481
87	0.0239059	0.119628	0.0167026	0.0169905	0.000255896	0.106006	0.0643603	17.2009	4.83216e-14	0.0449868	0.00873865	0.128963	0.244347	0.412529
87	0.0241376	0.121377	0.0239556	0.0216401	0.00029104	0.103484	0.0714117	8.00146	5.12588e-14	0.0552893	0.0101468	0.167608	0.285924	0.605632
87	0.0224312	0.119309	0.0225415	0.0181453	0.000259205	0.100189	0.0650445	10.2758	3.32347e-14	0.0532197	0.0097053	0.16741	0.294324	0.638729
88	0.0623005	0.122395	0.0754984	0.0636857	0.000637084	0.244959	0.189577	4.34787	1.8083e-13	0.144963	0.00332224	0.243677	0.301156	0.556468
88	0.067006	0.123166	0.0838097	0.0724845	0.000720105	0.264627	0.206003	4.13169	4.56554e-13	0.18254	0.00480452	0.268424	0.349569	0.638774
88	0.0599996	0.122436	0.0739149	0.0617986	0.000625782	0.238197	0.182632	4.49784	2.81122e-13	0.147584	0.00317183	0.233378	0.289847	0.465955
88	0.0645436	0.121784	0.0770032	0.0717679	0.000709634	0.255777	0.199287	4.11331	2.28422e-13	0.176203	0.00462121	0.261875	0.352662	0.578761
89	0.0523232	0.118461	0.0297643	0.0479923	0.000736596	0.217129	0.161051	6.59458	8.76493e-14	0.0462586	0.0033926	0.209697	0.297568	0.654435
89	0.0483631	0.118309	0.0296911	0.0427137	0.000662464	0.201555	0.1473	7.28175	1.11302e-13	0.0515923	0.00337128	0.187357	0.292135	0.640226
89	0.0509433	0.118243	0.033123	0.0511888	0.000800226	0.213131	0.159379	6.10188	1.15818e-13	0.0481175	0.00532394	0.225518	0.335722	0.726565
89	0.0541842	0.118532	0.0405635	0.0536706	0.000843639	0.226324	0.16483	6.79065	9.88788e-14	0.06067	0.0137404	0.235495	0.359441	0.784563
89	0.0514844	0.118464	0.030784	0.0501721	0.000841171	0.215579	0.15982	6.51341	8.70126e-14	0.0452748	0.0144584	0.185116	0.260578	0.33173
89	0.0501127	0.11842	0.0242453	0.0500036	0.000835813	0.207725	0.15277	6.17048	9.01434e-14	0.0398566	0.0115207	0.147181	0.228034	0.351507
90	0.018417	0.115245	0.0245076	0.01438	8.33947e-05	0.0820412	0.0489594	26.3411	2.19825e-13	0.0525466	0.00371913	0.140336	0.198826	0.420737
90	0.0277601	0.115735	0.0513798	0.021146	0.000124215	0.127742	0.0752549	17.6545	2.21512e-13	0.144735	0.0143564	0.19903	0.307004	0.643256
91	0.0670671	0.121254	0.0308733	0.0793187	0.000893264	0.273941	0.211563	4.53925	4.45545e-13	0.0553485	0.0331668	0.123387	0.136693	0.73328
91	0.0624537	0.11954	0.078266	0.0727608	0.000820845	0.25695	0.199204	4.51258	1.10312e-13	0.146629	0.0263328	0.288975	0.303831	0.528893
91	0.0579249	0.120539	0.0233936	0.0609325	0.000607555	0.238847	0.178163	5.53282	3.23964e-13	0.045604	0.0232371	0.0993554	0.120776	0.612352
91	0.0557999	0.119983	0.0698023	0.0630738	0.000605573	0.228515	0.174543	4.60895	1.73228e-13	0.128921	0.0217401	0.256567	0.268891	0.519145
92	0.0518176	0.116519	0.032155	0.050095	0.000348026	0.224956	0.155514	8.74898	7.20646e-13	0.0894298	0.0389462	0.104715	0.189736	0.337004
92	0.0534759	0.11628	0.0571948	0.0501967	0.000347436	0.224985	0.160046	7.75371	1.67219e-13	0.065277	0.0297343	0.211125	0.163153	0.5002
92	0.0488145	0.115942	0.041737	0.0453719	0.000307171	0.211899	0.145446	9.12255	3.666e-13	0.0822543	0.0431842	0.118597	0.143903	0.351292
92	0.0537772	0.116287	0.0565239	0.0493081	0.000342092	0.227844	0.15864	8.524	2.7398e-13	0.0643905	0.0261454	0.205192	0.156169	0.476744
93	0.0202431	0.113348	0.0163534	0.0184298	0.000393304	0.0938264	0.0572934	15.3972	1.01813e-14	0.0310768	0.00270483	0.121494	0.163383	0.305085
93	0.0236778	0.116958	0.0156351	0.0192815	0.000430632	0.103503	0.0641872	25.3544	8.95879e-15	0.0301061	0.00323117	0.114927	0.157341	0.347462
93	0.0227716	0.112979	0.013894	0.0197883	0.00045175	0.106441	0.0623263	17.228	2.75075e-14	0.0249254	0.00266266	0.0993969	0.120936	0.247297
93	0.0214269	0.116329	0.0134062	0.0176179	0.000417583	0.0994311	0.0608792	13.7613	1.0962e-14	0.0264577	0.00386013	0.0972566	0.125732	0.289727
94	0.0342314	0.117746	0.0460198	0.0394714	0.000408161	0.144891	0.105403	6.38699	1.44747e-13	0.123185	0.0149374	0.0919545	0.13471	0.420254
94	0.0342028	0.118735	0.046291	0.0382524	0.000398417	0.144816	0.102737	8.22919	5.39462e-14	0.120082	0.0134359	0.0991144	0.14003	0.399866
95	0.0271825	0.114467	0.193346	0.0256573	0.000574035	0.125048	0.0805001	10.1323	5.09435e-14	0.15166	0.096739	0.374039	0.284252	0.606229
95	0.0285337	0.113963	0.129635	0.0254393	0.000569709	0.128572	0.0823812	11.6522	1.63484e-14	0.111498	0.0600854	0.258169	0.224974	0.355917
96	0.0241348	0.115121	0.18904	0.0260924	0.000499005	0.105276	0.0745457	7.0535	3.4457e-14	0.174864	0.0801672	0.423833	0.415922	0.509242
96	0.0344421	0.113279	0.132216	0.0335196	0.000706356	0.154656	0.103639	8.81548	5.25483e-14	0.113382	0.0540689	0.31511	0.300134	0.336042
96	0.0264891	0.117358	0.199365	0.0231598	0.000438978	0.119847	0.0731018	14.8965	3.66356e-14	0.162282	0.123309	0.386552	0.323172	0.561258
96	0.0230189	0.113027	0.15264	0.0221319	0.000406809	0.102494	0.0689073	9.22087	1.70631e-14	0.132308	0.0848717	0.300287	0.282233	0.384117
97	0.0221688	0.11297	0.0301093	0.0186455	0.000280875	0.098981	0.0604621	19.2985	5.09016e-14	0.0564909	0.0102141	0.108987	0.140128	0.560303
97	0.0201492	0.114461	0.0276065	0.0179114	0.000260502	0.0930862	0.0566598	15.9627	5.91572e-14	0.055253	0.0079238	0.117411	0.17257	0.491057
97	0.0213488	0.112576	0.0382199	0.0204249	0.00035131	0.0981528	0.0616917	11.959	2.90384e-14	0.0773795	0.00886734	0.167969	0.247341	0.593713
97	0.021936	0.114659	0.026739	0.0212006	0.000366664	0.0985433	0.0658819	9.35928	2.94401e-14	0.0522105	0.00797075	0.13149	0.199675	0.461685
98	0.013701	0.120691	0.0054004	0.00411769	6.87514e-05	0.0678298	0.0218948	55.7645	4.77856e-14	0.0342706	0.00932412	0.0294465	0.236309	0.269066
98	0.009799	0.119865	0.00288708	0.00273712	4.79773e-05	0.0438972	0.0150655	85.303	2.32316e-14	0.0238839	0.0104922	0.010781	0.165683	0.430896
98	0.0157093	0.118492	0.0129665	0.00627212	8.08332e-05	0.0720805	0.0322769	56.486	8.87519e-14	0.061805	0.0122493	0.0939284	0.266105	0.192543
98	0.013139	0.120248	0.00573736	0.0049089	6.65562e-05	0.0638029	0.0262333	41.34	3.36159e-14	0.0326367	0.0107713	0.0339926	0.218727	0.330342
98	0.0160153	0.117628	0.0172454	0.0122948	0.000105035	0.074173	0.0428714	18.3179	1.61947e-13	0.0520567	0.00821033	0.155931	0.307651	0.56255
98	0.0144023	0.116175	0.0155408	0.0110218	9.39502e-05	0.0684302	0.0364852	21.8399	9.45576e-14	0.0456526	0.00574878	0.142018	0.297954	0.725719
98	0.0181597	0.118959	0.012767	0.00708719	9.86384e-05	0.0873764	0.041585	30.2032	7.37839e-14	0.0461884	0.0186366	0.074063	0.29557	0.295227
98	0.0124803	0.119284	0.00954084	0.00540179	6.88362e-05	0.0579352	0.0257117	44.8449	7.32304e-14	0.0438294	0.0116857	0.0662728	0.276555	0.632779
99	0.0147043	0.117566	0.00587035	0.00555579	7.69877e-05	0.0698112	0.0287905	50.546	6.893e-14	0.0596162	0.087034	0.038785	0.318632	0.448159
99	0.012004	0.117484	0.00684941	0.00520374	6.37243e-05	0.0558514	0.0243999	48.6451	8.16969e-14	0.0446796	0.0457553	0.0460587	0.233518	0.359422
99	0.0129811	0.118862	0.00386194	0.00381396	6.25334e-05	0.0606699	0.021417	69.129	4.65332e-14	0.0574147	0.0924453	0.0225358	0.295939	0.403089
99	0.0112102	0.11864	0.00292427	0.0031242	5.43362e-05	0.0490088	0.0167875	100.093	4.27347e-14	0.0343196	0.0429321	0.01413	0.208289	0.388439
99	0.0164862	0.115486	0.0185147	0.0100742	8.74299e-05	0.0771194	0.0412731	24.808	6.98836e-14	0.0625466	0.0351516	0.139461	0.220817	0.454323
99	0.0128447	0.11407	0.013395	0.00919545	7.14807e-05	0.0606354	0.0311629	25.7078	1.3098e-13	0.0497684	0.0198185	0.100663	0.197934	0.536856
99	0.0169857	0.11614	0.0156171	0.0121071	0.000106433	0.078491	0.0433604	26.9575	9.20097e-14	0.0481837	0.0230981	0.130648	0.214818	0.369139
99	0.013358	0.114489	0.0160054	0.0103276	8.5263e-05	0.0630219	0.0344392	21.6117	1.17098e-13	0.0495294	0.0185384	0.119741	0.181973	0.349479
100	0.0167296	0.120915	0.00506109	0.00513076	9.15574e-05	0.077942	0.0284251	62.7182	7.55181e-14	0.0134799	0.00745144	0.0274353	0.0716471	0.236547
100	0.0169403	0.119302	0.00622609	0.00557716	9.32292e-05	0.0789639	0.0293978	61.0503	2.32784e-14	0.0209225	0.0101705	0.0315544	0.137181	0.679324
100	0.0182626	0.124779	0.00519743	0.00516947	8.33998e-05	0.0856059	0.0305768	56.6801	4.10243e-14	0.00785723	0.00566529	0.0249911	0.0356732	0.20777
100	0.0168977	0.125369	0.00485968	0.00443545	7.75412e-05	0.0751578	0.0252432	80.6071	1.70912e-14	0.0102256	0.0072984	0.0201573	0.0403994	0.706194
100	0.0197606	0.122247	0.0123779	0.00904396	0.000149472	0.0889931	0.0476651	33.1455	4.51029e-14	0.0389536	0.0160225	0.0710729	0.259906	0.318073
100	0.015507	0.122767	0.0103349	0.00612021	0.000114588	0.0704977	0.0301983	61.5325	2.51073e-14	0.0478263	0.0118159	0.0624787	0.264429	0.612718
100	0.0199322	0.120492	0.0120165	0.00891626	0.000136883	0.0916969	0.0478353	31.2402	5.10304e-14	0.0355703	0.0122574	0.0648057	0.235376	0.375905
100	0.0142172	0.119495	0.0101733	0.00603701	9.7126e-05	0.0650664	0.0290637	52.0972	2.56856e-14	0.0479261	0.0123985	0.0608703	0.252974	0.628452
100	0.0221261	0.115701	0.0221285	0.0156064	0.000142203	0.097639	0.0590427	17.582	3.94094e-14	0.0497761	0.00678958	0.162387	0.261071	0.596552
100	0.0167305	0.117569	0.0112311	0.00821051	9.67255e-05	0.0753674	0.0377502	44.5887	4.46178e-14	0.0469933	0.0124972	0.0863386	0.282198	0.656385
100	0.0220341	0.115725	0.0186437	0.0141968	0.000142923	0.0959931	0.0591048	18.5642	8.18331e-14	0.0509456	0.0165547	0.14152	0.275867	0.462476
100	0.0177772	0.117401	0.0130131	0.0080219	0.000106169	0.0831088	0.0361114	44.5215	8.247e-14	0.0576591	0.0134205	0.0933983	0.303592	0.655015
101	0.0298671	0.112404	0.0245697	0.0298873	0.000106841	0.134061	0.0889839	10.3084	1.04807e-12	0.0450184	0.0224196	0.0697354	0.0886062	0.502879
101	0.017138	0.112327	0.0186835	0.0160929	5.91533e-05	0.0784047	0.0491533	13.7806	5.6755e-13	0.0318054	0.0110801	0.0574192	0.0653484	0.530783
101	0.018385	0.110984	0.0189048	0.0181761	6.61311e-05	0.0816031	0.0523278	19.1513	8.88707e-13	0.0365683	0.0119565	0.0487445	0.0621315	0.442238
101	0.0131173	0.113437	0.0162289	0.0119644	4.70022e-05	0.0596805	0.0372562	16.4155	5.5583e-13	0.0291903	0.00713879	0.0464287	0.0563057	0.395495
102	0.0252871	0.111309	0.0137906	0.0281803	0.000294258	0.110067	0.0768067	10.3347	1.32337e-13	0.0274883	0.00423237	0.0943538	0.129127	0.359682
102	0.0188727	0.112069	0.0127999	0.0181357	0.000206145	0.0846951	0.0556961	12.8744	8.53922e-14	0.0277281	0.00478984	0.106525	0.167041	0.437489
102	0.0240753	0.11112	0.0132892	0.027951	0.000289738	0.101959	0.074197	10.6878	1.23433e-13	0.0279935	0.00337417	0.103369	0.156878	0.477123
102	0.0210919	0.111371	0.0160517	0.0205611	0.000229152	0.0945947	0.0620814	13.9103	1.00647e-13	0.0356646	0.00421548	0.123654	0.202618	0.595585
103	0.0368858	0.113262	0.0197664	0.0351139	0.000506176	0.168564	0.103616	15.6872	5.72942e-14	0.0401808	0.0375962	0.0755243	0.109478	0.617957
103	0.0198616	0.113389	0.0147731	0.018984	0.000279032	0.0874731	0.0567347	17.3774	3.1786e-14	0.0267069	0.00361386	0.0564101	0.0678705	0.527633
103	0.0287962	0.112472	0.0223318	0.0264129	0.000374918	0.125261	0.0789115	24.1321	6.23433e-14	0.0407678	0.0100397	0.0767465	0.0975144	0.460433
103	0.0184496	0.113878	0.0152578	0.0167782	0.000239577	0.0841692	0.0518801	16.2254	4.21175e-14	0.0298364	0.00607101	0.0551516	0.0707098	0.666486
104	0.0298531	0.115806	0.0129306	0.0258829	0.000309448	0.139009	0.081511	17.2792	8.78693e-14	0.0241397	0.00248838	0.0619907	0.0788947	0.453801
104	0.0260713	0.11393	0.0121103	0.0229421	0.000266409	0.119968	0.0741328	15.0716	7.62436e-14	0.0217155	0.00338286	0.0683376	0.0800895	0.245225
104	0.02766	0.11604	0.0133079	0.0252381	0.000325313	0.125249	0.0792127	13.7523	2.41039e-14	0.0215277	0.00245591	0.0710547	0.0766341	0.360942
104	0.0275236	0.113373	0.0134538	0.0252307	0.00032376	0.126062	0.0807256	11.0575	9.10952e-14	0.0289879	0.00353631	0.079357	0.108854	0.268588
104	0.0409987	0.113467	0.0187149	0.0495924	0.00044812	0.17538	0.129702	5.81257	3.09985e-13	0.0311068	0.00387517	0.133488	0.164425	0.544773
104	0.0334045	0.113153	0.0158081	0.0403847	0.000370805	0.142716	0.105273	5.95109	3.32009e-13	0.0308116	0.00310523	0.118459	0.16792	0.423596
104	0.0390385	0.11168	0.0210248	0.0460991	0.000440561	0.16753	0.123399	5.59855	1.34589e-13	0.0351113	0.00389548	0.162493	0.201707	0.33224
104	0.0312389	0.112206	0.0196093	0.0367078	0.000350142	0.133815	0.0979107	5.96655	1.75744e-13	0.0381196	0.00431589	0.157589	0.223339	0.330061
104	0.0364085	0.11166	0.0177474	0.0436959	0.000528024	0.154842	0.116116	5.29008	1.01595e-13	0.030729	0.00616464	0.136699	0.165173	0.314116
104	0.0286626	0.111701	0.0214399	0.0334741	0.000410716	0.123002	0.0900775	6.19614	4.8716e-14	0.0441166	0.00678884	0.157903	0.223403	0.375387
105	0.0222773	0.114461	0.0251193	0.01874	0.000150773	0.10072	0.0629429	14.8819	1.93718e-13	0.0463199	0.00978643	0.119613	0.132403	0.251422
105	0.0382112	0.116158	0.020495	0.0355401	0.000271927	0.168608	0.112244	9.79208	3.36118e-13	0.0450359	0.00641757	0.121589	0.17496	0.269947
105	0.0212432	0.114245	0.0184429	0.0163655	0.000132847	0.0966448	0.0570432	22.9089	2.78732e-13	0.050039	0.00848495	0.0787649	0.115049	0.22751
105	0.0405752	0.116074	0.0239762	0.0369962	0.000273712	0.177724	0.11962	9.58055	4.07098e-13	0.0476614	0.0115384	0.133941	0.151254	0.321906
105	0.0245678	0.114649	0.0204657	0.0174026	0.000126155	0.114919	0.0634438	23.9716	4.71537e-13	0.0592011	0.0129716	0.0831067	0.125975	0.282646
105	0.0404707	0.116567	0.024071	0.0371846	0.000229604	0.179608	0.11948	10.0004	2.97616e-13	0.0514459	0.015646	0.115038	0.131305	0.332128
105	0.0216381	0.114965	0.0228861	0.0158495	0.00011628	0.101748	0.0564238	21.6236	3.03417e-13	0.0374113	0.0103755	0.104275	0.0962197	0.19447
105	0.0399972	0.116885	0.0271435	0.0377	0.00023851	0.176902	0.120046	8.70226	3.14851e-13	0.054049	0.0116047	0.147272	0.176582	0.328703
106	0.0307668	0.115056	0.0160666	0.024841	0.00020585	0.143771	0.085201	14.4919	1.62503e-13	0.0401661	0.0652348	0.0727563	0.0986104	0.680152
106	0.0562275	0.121849	0.0234676	0.049314	0.000387076	0.249659	0.169038	8.10985	5.32803e-13	0.0525423	0.0165833	0.149148	0.225777	0.647936
106	0.0297108	0.11528	0.0155851	0.0254992	0.00019636	0.136996	0.0826073	13.8691	3.03822e-13	0.0389642	0.0661372	0.0720477	0.0974747	0.668721
106	0.0531771	0.118788	0.0232788	0.047228	0.000355236	0.235363	0.159557	8.03696	3.53126e-13	0.0493173	0.0115992	0.15054	0.211796	0.598797
107	0.0164626	0.112701	0.023892	0.0149615	0.00017258	0.075357	0.046067	19.7238	1.21262e-13	0.0558084	0.00872724	0.14339	0.194734	0.336142
107	0.0166441	0.112127	0.0211415	0.0151867	0.000179121	0.0761539	0.0466663	17.4274	6.71094e-14	0.0522221	0.0108114	0.138369	0.186043	0.299804
107	0.0219696	0.112582	0.0266791	0.0171198	0.000213885	0.0951114	0.0520514	40.3828	3.80283e-14	0.0634429	0.0106513	0.130014	0.172403	0.351876
107	0.0204005	0.11207	0.0261364	0.0160813	0.000205046	0.0853496	0.0487733	53.5984	6.1631e-14	0.0612956	0.0102582	0.136628	0.177855	0.335637
108	0.0311723	0.117983	0.0212726	0.0226957	0.000282552	0.14572	0.0843117	17.8309	1.15033e-13	0.0465122	0.139983	0.0777868	0.112856	0.590055
108	0.02729	0.116024	0.0244251	0.0230115	0.000265616	0.126142	0.079079	12.8921	1.6622e-13	0.0637988	0.0105488	0.121195	0.217753	0.54101
108	0.029421	0.116979	0.026893	0.02034	0.000250695	0.139904	0.0768106	19.8212	2.20362e-13	0.0527746	0.108604	0.0904222	0.115094	0.618677
108	0.0255137	0.115355	0.0239508	0.0221967	0.000244466	0.118059	0.07546	11.3994	1.2824e-13	0.0650632	0.0122916	0.126662	0.233188	0.514534
109	0.0190233	0.112283	0.0172271	0.0194647	0.000187755	0.084295	0.0547155	15.3531	6.84097e-14	0.0355649	0.00423089	0.0977363	0.126113	0.24764
109	0.0151294	0.111863	0.011171	0.0158289	0.000151992	0.0694068	0.0427784	14.4551	3.38625e-14	0.0247094	0.00395873	0.0732593	0.104492	0.297218
109	0.0191319	0.111811	0.0160211	0.0204273	0.000195076	0.0856088	0.0553642	13.8481	7.70475e-14	0.031798	0.00536932	0.0916884	0.111439	0.237702
109	0.0181061	0.111703	0.0122691	0.0195738	0.00018773	0.0810383	0.0522672	13.1138	7.60454e-14	0.0279561	0.0071119	0.0826599	0.117342	0.312581
110	0.0300761	0.113281	0.030128	0.0281425	0.000471345	0.135683	0.086775	13.0426	4.09807e-14	0.0586379	0.0144078	0.120096	0.158769	0.761889
110	0.0285714	0.113547	0.0354628	0.0279206	0.00046219	0.125826	0.0842116	11.6963	3.39069e-14	0.0680361	0.0130629	0.134647	0.178501	0.728685
110	0.0219795	0.113167	0.0270809	0.0209876	0.000347368	0.0984414	0.0652378	11.3728	7.09185e-14	0.0443779	0.00525899	0.108252	0.132371	0.418123
110	0.0231652	0.113225	0.021157	0.0211542	0.000355565	0.102814	0.0650697	17.082	3.6441e-15	0.0426323	0.00545353	0.091498	0.135104	0.495022
111	0.0260273	0.112462	0.042418	0.0303902	0.000201694	0.112902	0.0810391	6.89495	3.0945e-13	0.0796618	0.00518185	0.264585	0.375203	0.272867
111	0.026909	0.113824	0.0216851	0.0251077	0.000187563	0.122166	0.0770097	14.0729	1.72466e-13	0.043201	0.009016	0.103759	0.122776	0.195598
111	0.0336481	0.111903	0.0384386	0.0425846	0.000347627	0.141531	0.107852	4.64379	2.02825e-13	0.0690546	0.0042106	0.250641	0.35092	0.287371
111	0.0426005	0.115788	0.0269012	0.0461992	0.000409134	0.183936	0.133641	6.14308	1.93031e-13	0.0527405	0.00694127	0.134831	0.165536	0.239146
111	0.0287006	0.111642	0.0346363	0.0336983	0.000226384	0.123855	0.0892374	7.37173	3.60983e-13	0.0773082	0.00815446	0.17086	0.270647	0.385477
111	0.0357784	0.116489	0.0334681	0.038624	0.00027303	0.150001	0.111204	5.58522	2.71778e-13	0.0728396	0.00815046	0.19777	0.272532	0.341868
111	0.0314911	0.112094	0.0323847	0.0377966	0.000246593	0.13382	0.0988056	6.23671	2.95814e-13	0.0690178	0.00680173	0.181505	0.28143	0.363849
111	0.0346124	0.116744	0.0297651	0.0372575	0.000256792	0.145999	0.107245	5.92867	4.28929e-13	0.0676924	0.0078807	0.188508	0.280428	0.358886
111	0.0379784	0.113369	0.0372669	0.0447087	0.000291246	0.16293	0.11993	5.83114	2.93156e-13	0.0671654	0.0036822	0.27089	0.393993	0.425821
111	0.0385807	0.115487	0.02706	0.0397595	0.000279481	0.167871	0.118688	7.6221	4.2786e-13	0.0557239	0.00545432	0.149549	0.196856	0.254567
111	0.0332581	0.113894	0.0221754	0.035598	0.00029297	0.149661	0.100344	10.1963	3.6816e-13	0.0484288	0.00589863	0.121429	0.188814	0.382603
111	0.0365861	0.114555	0.0186627	0.0401151	0.000333926	0.158196	0.113985	6.66703	1.95651e-13	0.0411064	0.00565916	0.111431	0.155144	0.237555
112	0.0236078	0.114825	0.0683484	0.0199384	9.7795e-05	0.106395	0.065149	18.1646	3.17173e-13	0.182908	0.0665109	0.15135	0.245626	0.42173
112	0.0233825	0.112559	0.0473029	0.0222168	0.000102861	0.105471	0.0672049	15.6911	5.24709e-13	0.0999316	0.0311589	0.135502	0.197368	0.356134
113	0.0387825	0.115555	0.0366961	0.0321279	0.000289188	0.175682	0.111602	12.9729	1.89795e-13	0.0842086	0.00914911	0.127603	0.173237	0.469611
113	0.0295418	0.114385	0.0398147	0.0214347	0.000213775	0.139857	0.0758563	22.9225	1.67349e-13	0.0766139	0.00748702	0.142986	0.162112	0.460916
113	0.0401797	0.114994	0.0301146	0.0346891	0.00031325	0.184027	0.115773	12.037	2.03481e-13	0.0708537	0.00825167	0.117149	0.161478	0.377594
113	0.0263339	0.114485	0.0263898	0.021134	0.000197685	0.12276	0.0699382	22.5197	1.69991e-13	0.0671104	0.00773314	0.123494	0.180242	0.308447
114	0.0298982	0.112152	0.0247776	0.0299311	0.00024227	0.13334	0.0884786	11.268	3.15377e-13	0.0644789	0.00993946	0.09272	0.133808	0.28733
114	0.0217856	0.118317	0.0382266	0.0191444	0.000169817	0.0978056	0.0621268	15.3191	1.87798e-13	0.0914842	0.00682825	0.186954	0.277757	0.571822
114	0.03098	0.112146	0.0222521	0.0306051	0.000258319	0.137484	0.0918088	11.2427	2.65868e-13	0.0540362	0.013535	0.0785728	0.107185	0.329292
114	0.0196869	0.118354	0.038746	0.0166057	0.000154546	0.0905014	0.0548647	16.5632	5.8046e-14	0.0984319	0.00669743	0.195209	0.300784	0.550492
115	0.0268184	0.113318	0.022899	0.0262684	0.000183941	0.120965	0.078982	11.2556	3.27247e-13	0.0603781	0.00850658	0.0809138	0.146637	0.60248
115	0.0199544	0.113337	0.0271525	0.0162725	0.000126074	0.0893822	0.0513838	31.127	8.19708e-14	0.0565815	0.00549386	0.0898266	0.127599	0.752222
115	0.0285387	0.113846	0.0239392	0.0263738	0.000190243	0.126723	0.0807252	16.8718	2.86116e-13	0.0636316	0.00607256	0.0748861	0.137857	0.571763
115	0.017857	0.113342	0.0236394	0.0145323	0.000114456	0.0831052	0.0468645	23.0991	7.68787e-14	0.0516894	0.00544919	0.083511	0.125126	0.74502
115	0.0211366	0.112674	0.0304568	0.0224578	0.000163388	0.0930241	0.0628128	11.1758	1.8734e-13	0.0737987	0.00794505	0.104305	0.139375	0.30511
115	0.0154039	0.112556	0.0229659	0.0156122	0.000118141	0.0669002	0.0446164	14.81	1.44482e-13	0.0435871	0.00654148	0.093989	0.135996	0.719247
115	0.0229334	0.112203	0.0381904	0.0239083	0.00017571	0.0999343	0.0683004	11.3807	2.29414e-13	0.0904301	0.00942723	0.112596	0.141135	0.283668
115	0.0170783	0.111815	0.0209241	0.0137722	0.000116727	0.0755831	0.0410447	39.272	1.16279e-13	0.0424219	0.00627	0.0731306	0.101463	0.478288
116	0.0185258	0.113499	0.0172178	0.0151532	0.000142501	0.0841686	0.0497673	27.2061	9.01592e-14	0.0395918	0.00353265	0.0764097	0.105759	0.169165
116	0.0205444	0.114197	0.0120045	0.0203656	0.000176003	0.0895817	0.0603663	12.3713	1.96479e-13	0.0305723	0.00392097	0.0724204	0.128188	0.308471
116	0.0197877	0.113314	0.011918	0.0172079	0.000179223	0.0877441	0.0592431	10.0069	1.06005e-13	0.0374205	0.00687689	0.0536899	0.0972803	0.213195
116	0.0221743	0.114132	0.0131353	0.0223039	0.000217585	0.0953607	0.0649647	13.7677	1.26112e-13	0.0371984	0.00703977	0.0805174	0.152872	0.4064
116	0.0244141	0.114332	0.0138978	0.0180871	0.000164755	0.11044	0.067864	16.3059	1.2519e-13	0.036583	0.00694166	0.0606876	0.0919423	0.194497
116	0.0240675	0.114087	0.0179022	0.0226498	0.000181918	0.105508	0.0701262	13.2673	1.74447e-13	0.0429748	0.00699527	0.106451	0.166544	0.36852
116	0.0252504	0.114358	0.0173263	0.0200543	0.00016481	0.113392	0.0707904	16.0789	7.68912e-14	0.0424017	0.00848302	0.0777926	0.11129	0.246069
116	0.0249791	0.11255	0.0159295	0.0254365	0.000183872	0.108277	0.0760364	8.79506	1.75577e-13	0.0416446	0.00762308	0.109232	0.192271	0.444754
117	0.0183076	0.112853	0.00756733	0.0143973	0.000177931	0.0853251	0.0499902	25.4931	5.87004e-14	0.0196754	0.00678472	0.064779	0.109105	0.221615
117	0.0184328	0.114322	0.00849469	0.0147371	0.000180402	0.0823077	0.0488238	31.4335	3.45157e-14	0.0208022	0.00743012	0.073617	0.124555	0.283858
117	0.0197637	0.113745	0.00831473	0.0141289	0.000170308	0.0915371	0.0519743	29.41	5.32959e-14	0.023087	0.00907692	0.0777355	0.151088	0.267618
117	0.0201047	0.116274	0.0092534	0.0138554	0.00017075	0.0912186	0.0496482	36.1084	1.22457e-13	0.0240758	0.00933731	0.0830222	0.160208	0.290567
118	0.0267821	0.111848	0.0152723	0.0286544	0.000363679	0.11631	0.0785708	13.6494	6.59876e-14	0.0272219	0.0236845	0.067466	0.0926451	0.366143
118	0.0209473	0.113558	0.0184098	0.0183815	0.000260573	0.097793	0.0570547	18.796	3.94779e-14	0.0358658	0.00621496	0.0842295	0.126047	0.279042
118	0.022107	0.111719	0.0139233	0.0241378	0.000315598	0.0961983	0.0660725	12.4414	6.8679e-14	0.0239784	0.0348442	0.0626705	0.083937	0.361261
118	0.0199524	0.113327	0.0164043	0.0179103	0.000257973	0.0917367	0.0541928	21.8626	1.32376e-14	0.0315801	0.0184083	0.0783257	0.120608	0.299528
119	0.0222025	0.112055	0.0269847	0.0202238	0.000268763	0.103282	0.0606642	18.2418	7.65874e-14	0.0484456	0.0241857	0.101062	0.133283	0.361663
119	0.0212446	0.112399	0.018007	0.0191997	0.000267656	0.0992751	0.0582601	19.5276	1.10995e-13	0.0351989	0.0197282	0.086461	0.132479	0.251821
120	0.0123016	0.114971	0.0650241	0.00442315	5.13938e-05	0.057301	0.0203196	85.6426	8.61049e-14	0.147303	0.079841	0.184891	0.14291	0.480055
120	0.0183549	0.116346	0.033457	0.0159794	9.73753e-05	0.0811015	0.0530517	11.1635	4.08704e-13	0.0611128	0.0635733	0.1431	0.0684314	0.231804
120	0.0123311	0.115883	0.0533753	0.00441696	5.44372e-05	0.058681	0.0224116	65.5115	3.69655e-14	0.131595	0.047601	0.149377	0.123911	0.420393
120	0.0225064	0.116322	0.0341208	0.0191292	0.000123094	0.0997497	0.0643139	11.7695	2.62999e-13	0.0652892	0.0689852	0.13876	0.068144	0.241236
120	0.0167355	0.113327	0.0391499	0.0131923	0.00010383	0.0768781	0.0424012	27.5559	1.20506e-13	0.0543609	0.0168632	0.156697	0.14599	0.630994
120	0.0200142	0.11211	0.0243495	0.0216686	0.000144112	0.0880601	0.0599778	10.5252	1.57627e-13	0.0995717	0.028141	0.106037	0.231227	0.626641
120	0.0188629	0.114322	0.059824	0.0139574	9.62419e-05	0.0834649	0.0505968	17.9086	2.69159e-13	0.0877193	0.0531517	0.235681	0.157161	0.451207
120	0.023691	0.112858	0.0294194	0.0252573	0.000142325	0.103699	0.0718007	8.66951	5.00105e-13	0.0748793	0.0484815	0.123206	0.127604	0.422386
121	0.0196935	0.113382	0.0739709	0.0166614	0.000102646	0.0850442	0.0507567	33.0919	3.26701e-13	0.166036	0.00634336	0.223847	0.284357	0.29912
121	0.0228465	0.113456	0.0167076	0.0210395	0.000123615	0.106102	0.0652543	14.9664	2.18018e-13	0.0359773	0.00576552	0.0831423	0.128046	0.619918
121	0.0218957	0.113736	0.0805843	0.0182815	0.000107985	0.0970468	0.0583178	24.8615	3.16179e-13	0.165909	0.00642666	0.233303	0.279646	0.313391
121	0.0244715	0.113565	0.0216123	0.0231246	0.000128673	0.115632	0.0708817	12.3629	5.68321e-13	0.0487716	0.00653878	0.0925683	0.135975	0.618112
121	0.0212176	0.114915	0.0192483	0.0158959	0.000109823	0.0913133	0.0492219	43.5621	2.03865e-13	0.0302721	0.00981114	0.0878983	0.0852309	0.409947
121	0.0250777	0.113455	0.0160034	0.0252545	0.00014924	0.116448	0.0724032	12.3835	3.31148e-13	0.031358	0.00766637	0.0994543	0.132242	0.326503
121	0.0206011	0.114668	0.015208	0.0166173	0.000113475	0.0911244	0.051132	32.8585	1.89431e-13	0.0284063	0.00750934	0.0777358	0.0930911	0.342654
121	0.0217782	0.112992	0.0198017	0.0206777	0.000131488	0.0983795	0.0607745	18.3892	2.33406e-13	0.0396141	0.00629691	0.104666	0.144285	0.626982
122	0.0233346	0.114821	0.0171718	0.0222737	0.00027571	0.108044	0.0670505	12.2457	5.02856e-14	0.0423173	0.00302252	0.085205	0.114385	0.341638
122	0.0219289	0.115273	0.0136357	0.0180588	0.00024464	0.10444	0.0594127	17.2389	3.92012e-14	0.0337703	0.00556347	0.113965	0.202923	0.458955
122	0.0230962	0.114765	0.0190243	0.0217698	0.000258339	0.106792	0.0684474	10.9493	4.36574e-14	0.0517338	0.00316238	0.0823219	0.119722	0.281486
122	0.0235693	0.11532	0.0165584	0.018204	0.000246871	0.110792	0.063453	19.8223	7.10042e-14	0.0405415	0.00500916	0.129858	0.235473	0.480396
122	0.0244889	0.112223	0.019378	0.0231668	0.000362903	0.108944	0.0664668	24.7371	6.15921e-14	0.0420114	0.00286522	0.109295	0.150221	0.227169
122	0.0267785	0.114126	0.0144128	0.0193809	0.0003589	0.124744	0.0691961	26.0087	4.52122e-14	0.0322502	0.00454128	0.118553	0.208619	0.473989
122	0.0206713	0.112763	0.0247795	0.0218363	0.000245026	0.0921902	0.0610298	11.5107	7.82751e-14	0.0620198	0.00266018	0.130739	0.190239	0.210043
122	0.0221263	0.11541	0.0160076	0.016362	0.000225128	0.103807	0.0566025	25.7687	6.7848e-14	0.037087	0.00418739	0.119803	0.215766	0.384863
123	0.0168242	0.114708	0.0645888	0.0107347	0.000118707	0.0736901	0.038592	55.1627	5.39472e-14	0.134798	0.112016	0.100191	0.101884	0.411536
123	0.0167723	0.11495	0.0463112	0.0140251	0.000132471	0.0744837	0.0450941	22.1108	4.12915e-14	0.156497	0.0242888	0.187359	0.330946	0.505318
123	0.016743	0.113962	0.0619093	0.0106592	0.000118642	0.0739236	0.0386161	47.4591	6.71335e-14	0.150364	0.0709711	0.113525	0.124496	0.486441
123	0.0168976	0.114422	0.0294987	0.0137287	0.00013216	0.0748752	0.0446798	20.693	1.00159e-13	0.0801849	0.0321157	0.131683	0.202465	0.651472
123	0.014989	0.114129	0.0452777	0.010014	0.00010198	0.0685009	0.03743	34.2672	8.38116e-14	0.114574	0.00746891	0.119146	0.135487	0.260453
123	0.0151158	0.116499	0.0330493	0.0111793	0.000106305	0.0661795	0.0373705	40.0498	8.26178e-14	0.0977524	0.0227671	0.15193	0.244482	0.514291
123	0.013754	0.116519	0.0389677	0.00890965	9.69271e-05	0.0625507	0.0346964	27.1916	6.0069e-14	0.10691	0.0138609	0.098786	0.108461	0.2712
123	0.0145169	0.115265	0.0357619	0.00955374	0.000103995	0.0653244	0.0347019	39.3965	7.96856e-14	0.101552	0.0290196	0.169701	0.232817	0.534146
124	0.0220109	0.11237	0.0168583	0.0219817	0.000470449	0.0984665	0.0645786	12.1771	2.52793e-14	0.0333049	0.00305926	0.10967	0.139347	0.346123
124	0.0212002	0.112446	0.00995096	0.0195796	0.000435923	0.0950398	0.0591127	23.3213	1.17594e-14	0.0199509	0.002019	0.0754066	0.102589	0.468246
124	0.0206181	0.111289	0.0124867	0.0214292	0.000541742	0.0925042	0.0624799	8.25371	1.23587e-14	0.0254644	0.00200045	0.0886011	0.121622	0.528612
124
125	0.0159153	0.113279	0.0639673	0.0117138	9.8671e-05	0.0721254	0.040843	33.5621	9.2623e-14	0.159064	0.00910498	0.139792	0.15387	0.365262
125	0.0196712	0.112042	0.0227174	0.0208268	0.00014399	0.0876526	0.0588998	11.3176	1.62826e-13	0.0584826	0.0104649	0.0924138	0.165767	0.54502
125	0.0175191	0.114581	0.0610628	0.0120358	0.00010828	0.0770778	0.043847	44.1255	8.63396e-14	0.161101	0.0103338	0.137276	0.153437	0.332734
125	0.0205724	0.112173	0.0255109	0.0204842	0.000150077	0.0925937	0.0589688	18.3273	9.3398e-14	0.062681	0.011049	0.11383	0.184892	0.488097
125	0.0186364	0.115454	0.0475956	0.0111208	9.88783e-05	0.0813359	0.0442763	42.6559	1.23625e-13	0.140255	0.0133038	0.253491	0.363708	0.256707
125	0.0199717	0.114923	0.0197698	0.0181681	0.000123588	0.0874247	0.0551248	22.6203	6.3721e-14	0.0467194	0.0127356	0.134552	0.179927	0.215122
125	0.0175343	0.114357	0.0426283	0.00884394	8.84732e-05	0.0776132	0.0404515	44.8586	9.03247e-14	0.117352	0.0170314	0.211303	0.24192	0.20009
125	0.0184576	0.115448	0.0241352	0.0159295	0.000110607	0.0823421	0.0507956	22.4699	1.78005e-13	0.052469	0.0134979	0.148823	0.177745	0.222754
